# 1 Direct Extraction of Signal and Noise 2 Correlations from Two-Photon 3 Calcium Imaging of Ensemble 4 Neuronal Activity

5 Anuththara Rupasinghe<sup>1,2</sup>, Nikolas A Francis<sup>3</sup>, Ji Liu<sup>3</sup>, Zac Bowen<sup>3</sup>, Patrick O  
6 Kanold<sup>3,4</sup>, Behtash Babadi<sup>1,2\*</sup>

\*For correspondence:  
[behtash@umd.edu](mailto:behtash@umd.edu) (BB)

7 <sup>1</sup>Department of Electrical & Computer Engineering, University of Maryland, College Park,  
8 MD, USA; <sup>2</sup>The Institute for Systems Research, University of Maryland, College Park, MD,  
9 USA; <sup>3</sup>Department of Biology, University of Maryland, College Park, MD, USA;  
10 <sup>4</sup>Department of Biomedical Engineering, Johns Hopkins University, Baltimore, MD, USA

---

12 **Abstract** Neuronal activity correlations are key to understanding how populations of neurons  
13 collectively encode information. While two-photon calcium imaging has created a unique  
14 opportunity to record the activity of large populations of neurons, existing methods for inferring  
15 correlations from these data face several challenges. First, the observations of spiking activity  
16 produced by two-photon imaging are temporally blurred and noisy. Secondly, even if the spiking  
17 data were perfectly recovered via deconvolution, inferring network-level features from binary  
18 spiking data is a challenging task due to the non-linear relation of neuronal spiking to endogenous  
19 and exogenous inputs. In this work, we propose a methodology to explicitly model and directly  
20 estimate signal and noise correlations from two-photon fluorescence observations, without  
21 requiring intermediate spike deconvolution. We provide theoretical guarantees on the  
22 performance of the proposed estimator and demonstrate its utility through applications to  
23 simulated and experimentally recorded data from the mouse auditory cortex.

---

## 25 Introduction

26 Neuronal activity correlations are essential in understanding how populations of neurons encode  
27 information. Correlations provide insights into the functional architecture and computations carried  
28 out by neuronal networks (*Abbott and Dayan, 1999; Averbach et al., 2006; Cohen and Kohn, 2011;*  
29 *Hansen et al., 2012; Kohn et al., 2016; Kohn and Smith, 2005; Lyamzin et al., 2015; Montijn et al.,*  
30 *2014; Smith and Sommer, 2013; Sompolinsky et al., 2001; Yatsenko et al., 2015*). Neuronal activity  
31 correlations are often categorized in two groups: *signal* correlations and *noise* correlations (*Cohen*  
32 *and Kohn, 2011; Cohen and Maunsell, 2009; Gawne and Richmond, 1993; Josić et al., 2009; Lyamzin*  
33 *et al., 2015; Vinci et al., 2016*). Given two neurons, signal correlation quantifies the similarity of  
34 neural responses that are time-locked to a repeated stimulus across trials, whereas noise correlation  
35 quantifies the stimulus-independent trial-to-trial variability shared by neural responses that are  
36 believed to arise from common latent inputs.

37 Two-photon calcium imaging has become increasingly popular in recent years to record *in vivo*  
38 neural activity simultaneously from hundreds of neurons (*Ahrens et al., 2013; Romano et al., 2017;*  
39 *Stosiek et al., 2003; Svoboda and Yasuda, 2006*). This technology takes advantage of intracellular

40 calcium flux mostly arising from spiking activity and captures calcium signaling in neurons in living  
41 animals using fluorescence microscopy. The observed fluorescence traces of calcium concentra-  
42 tions, however, are indirectly related to neuronal spiking activity. Extracting spiking activity from  
43 fluorescence traces is a challenging signal deconvolution problem, and has been the focus of active  
44 research (*Deneux et al., 2016; Friedrich et al., 2017; Grewe et al., 2010; Jewell et al., 2020; Jew-*  
45 *ell and Witten, 2018; Kazemipour et al., 2018; Pachitariu et al., 2018; Pnevmatikakis et al., 2016;*  
46 *Stringer and Pachitariu, 2019; Theis et al., 2016; Vogelstein et al., 2010, 2009*).

47 The most commonly used approach to infer signal and noise correlations from two-photon  
48 data is to directly apply the classical definitions of correlations for firing rates (*Lyamzin et al.,*  
49 *2015*), to fluorescence traces (*De Vico Fallani et al., 2015; Francis et al., 2018; Rothschild et al.,*  
50 *2010; Winkowski and Kanold, 2013*). However, it is well known that fluorescence observations are  
51 noisy and blurred surrogates of spiking activity, because of dependence on observation noise,  
52 calcium dynamics and the temporal properties of calcium indicators. Due to temporal blurring,  
53 the resulting signal and noise correlation estimates are highly biased. An alternative approach  
54 is to carry out the inference in a two-stage fashion: first, infer spikes using a deconvolution  
55 technique, and then compute firing rates and evaluate the correlations (*Kerlin et al., 2019; Najafi*  
56 *et al., 2020; Ramesh et al., 2018; Soudry et al., 2015; Yatsenko et al., 2015*). These two-stage  
57 estimates are highly sensitive to the accuracy of spike deconvolution, and require high temporal  
58 resolution and signal-to-noise ratios (*Lütcke et al., 2013; Pachitariu et al., 2018*). Furthermore,  
59 these deconvolution techniques are biased towards obtaining accurate first-order statistics (i.e.,  
60 spike timings) via spatiotemporal priors, which may be detrimental to recovering second-order  
61 statistics (i.e., correlations). Finally, both approaches also undermine the non-linear dynamics of  
62 spiking activity as governed by stimuli, past activity and other latent processes (*Truccolo et al.,*  
63 *2005*). There are a few existing studies that aim at improving estimation of neuronal correlations,  
64 but they either do not consider signal correlations (*Rupasinghe and Babadi, 2020; Yatsenko et al.,*  
65 *2015*), or aim at estimating surrogates of correlations from spikes such as the connectivity/coupling  
66 matrix (*Aitchison et al., 2017; Mishchenko et al., 2011; Soudry et al., 2015; Keeley et al., 2020*).

67 Here, we propose a methodology to *directly* estimate both signal and noise correlations from  
68 two-photon imaging observations, without requiring an intermediate step of spike deconvolution.  
69 We pose the problem under the commonly used experimental paradigm in which neuronal activity  
70 is recorded during trials of a repeated stimulus. We avoid the need to perform spike deconvolution  
71 by integrating techniques from point processes and state-space modeling that explicitly relate the  
72 signal and noise correlations to the observed fluorescence traces in a multi-tier model. Thus, we  
73 cast signal and noise correlations within a parameter estimation setting. To solve the resulting  
74 estimation problem in an efficient fashion, we develop a solution method based on variational  
75 inference (*Jordan et al., 1999; Blei et al., 2017*), by combining techniques from Pólya-Gamma  
76 augmentation (*Polson et al., 2013*) and compressible state-space estimation (*Rauch et al., 1965;*  
77 *Kazemipour et al., 2018; Ba et al., 2014*). We also provide theoretical guarantees on the bias and  
78 variance performance of the resulting estimator.

79 We demonstrate the utility of our proposed estimation framework through application to  
80 simulated and real data from the mouse auditory cortex during presentations of tones and acoustic  
81 noise. Our results corroborate existing hypotheses regarding the invariance of the noise correlation  
82 structure under spontaneous activity and stimulus-driven conditions, and its distinction from  
83 the signal correlation structure in the stimulus-driven condition (*Keeley et al., 2020; Rumyantsev*  
84 *et al., 2020; Bartolo et al., 2020*). Furthermore, while application of our proposed method to spatial  
85 analysis of signal and noise correlations in the mouse auditory cortex is consistent with existing work  
86 (*Winkowski and Kanold, 2013*), it reveals novel and distinct spatial trends in the correlation structure  
87 of layers 2/3 and 4. In summary, our method improves on existing work by: 1) joint estimation of  
88 signal and noise correlations directly from two-photon fluorescence observations without requiring  
89 intermediate spike deconvolution, 2) providing theoretical guarantees on the performance of the  
90 proposed estimator, and 3) gaining access to closed-form posterior approximations, with low-

91 complexity and iterative update rules and minimal dependence on training data. Our proposed  
 92 method can thus be used as a robust and scalable alternative to existing approaches for extracting  
 93 signal and noise correlations from two-photon imaging data.

## 94 Results

95 In this section we first demonstrate the utility of our proposed estimation framework through  
 96 simulation studies as well as applications on experimentally-recorded data from the mouse auditory  
 97 cortex. Then, we present theoretical performance bounds on the proposed estimator. Before  
 98 presenting the results, we will give an overview of the proposed signal and noise correlation  
 99 inference framework, and outline our contributions and their relationship to existing work. For the  
 100 ease of reproducibility, we have archived a MATLAB implementation of our proposed method in  
 101 GitHub ([Rupasinghe, 2020](#)), and have deposited the data used in this work in the Digital Repository  
 102 at the University of Maryland ([Rupasinghe et al., 2021](#)).

### 103 Signal and Noise correlations

104 We consider a canonical experimental setting in which the same external stimulus, denoted by  $s_t$ ,  
 105 is repeatedly presented across  $L$  independent trials and the spiking activity of a population of  $N$   
 106 neurons are indirectly measured using two-photon calcium fluorescence imaging. **Figure 1** (forward  
 107 arrow) shows the generative model that is used to quantify this procedure. The fluorescence  
 108 observation in the  $j^{\text{th}}$  trial from the  $j^{\text{th}}$  neuron at time frame  $t$ , denoted by  $y_{t,l}^{(j)}$ , is a noisy surrogate of  
 109 the intracellular calcium concentrations. The calcium concentrations in turn are temporally blurred  
 110 surrogates of the underlying spiking activity  $n_{t,l}^{(j)}$ , as shown in **Figure 1**.

111 In modeling the spiking activity, we consider two main contributions: 1) the common known  
 112 stimulus  $s_t$  affects the activity of the  $j^{\text{th}}$  neuron via an unknown kernel  $d_j$ , akin to the receptive field;  
 113 2) the trial-to-trial variability and other intrinsic/extrinsic neural covariates that are not time-locked  
 114 to the stimulus  $s_t$  are captured by a trial-dependent latent process  $x_{t,l}^{(j)}$ . Then, we use a Generalized  
 115 Linear Model to link these underlying neural covariates to spiking activity ([Truccolo et al., 2005](#)).

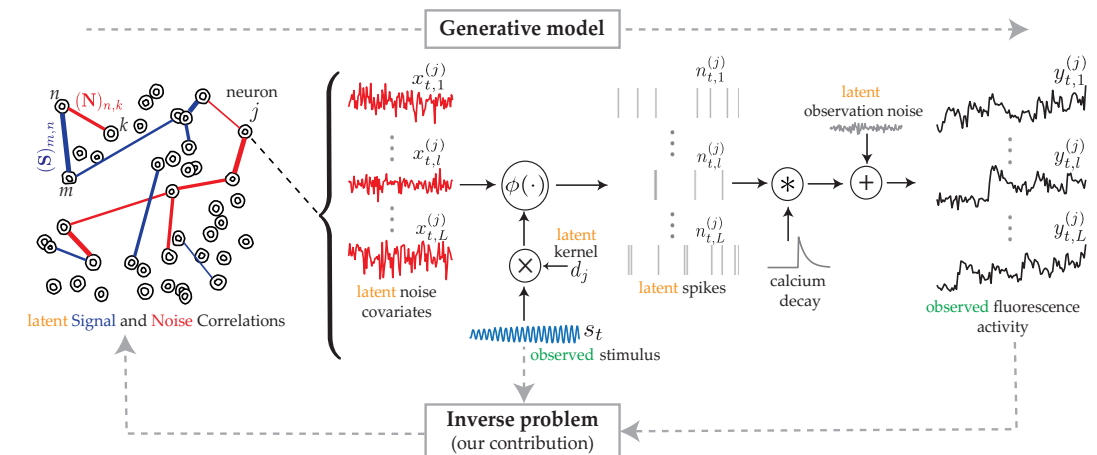

**Figure 1.** The proposed generative model and inverse problem. Observed (green) and latent (orange) variables pertinent to the  $j^{\text{th}}$  neuron are indicated, according to the proposed model for estimating the signal (blue) and noise (red) correlations from two-photon calcium fluorescence observations. Calcium fluorescence traces ( $y_{t,l}^{(j)}$ ) of  $L$  trials are observed, in which the repeated external stimulus ( $s_t$ ) is known. The underlying spiking activity ( $n_{t,l}^{(j)}$ ), trial-to-trial variability and other intrinsic/extrinsic neural covariates that are not time-locked with the external stimulus ( $x_{t,l}^{(j)}$ ), and the stimulus kernel ( $d_j$ ) are latent. Our main contribution is to solve the inverse problem: recovering the underlying latent signal ( $S$ ) and noise ( $N$ ) correlations directly from the fluorescence observations, without requiring intermediate spike deconvolution.

116 More specifically, we model spiking activity as a Bernoulli process:

$$n_{t,l}^{(j)} \sim \text{Bernoulli} \left( \phi \left( x_{t,l}^{(j)}, \mathbf{d}_j^\top \mathbf{s}_t \right) \right),$$

117 where  $\phi(\cdot)$  is a mapping function, which could in general be non-linear.

118 The *signal* correlations aim to measure the correlations in the temporal response that is time-  
119 locked to the repeated stimulus,  $\mathbf{s}_t$ . On the other hand, *noise* correlations in our setting quantify  
120 connectivity arising from covariates that are unrelated to the stimulus, including the trial-to-trial  
121 variability (*Keeley et al., 2020*). Based on the foregoing model, we propose to formulate the signal  
122  $(\boldsymbol{\Sigma}_s)_{i,j}$  and noise  $(\boldsymbol{\Sigma}_x)_{i,j}$  covariance between the  $i^{\text{th}}$  neuron and  $j^{\text{th}}$  neuron as:

$$(\boldsymbol{\Sigma}_s)_{i,j} := \mathbf{d}_i^\top \text{cov}(\mathbf{s}_i, \mathbf{s}_j) \mathbf{d}_j, \quad (\boldsymbol{\Sigma}_x)_{i,j} := \text{cov} \left( x_{t,l}^{(i)}, x_{t,l}^{(j)} \right), \quad (1)$$

123 where  $\text{cov}(\cdot)$  is the empirical covariance function defined as  $\text{cov}(\mathbf{u}, \mathbf{v}) := \frac{1}{T} \sum_{t=1}^T \left( \mathbf{u}_t - \frac{1}{T} \sum_{t=1}^T \mathbf{u}_t \right)$   
124  $\left( \mathbf{v}_t - \frac{1}{T} \sum_{t=1}^T \mathbf{v}_t \right)^\top$ , for a total observation duration of  $T$  time frames.

125 Our main contribution is to provide an efficient solution for the so-called inverse problem: direct  
126 estimation of  $\boldsymbol{\Sigma}_s$  and  $\boldsymbol{\Sigma}_x$  from the fluorescence observations, without requiring intermediate spike  
127 deconvolution (*Figure 1*, backward arrow). The signal and noise correlation matrices, denoted by  $\mathbf{S}$   
128 and  $\mathbf{N}$ , can then be obtained by standard normalization of  $\boldsymbol{\Sigma}_s$  and  $\boldsymbol{\Sigma}_x$ :

$$(\mathbf{S})_{i,j} := \frac{(\boldsymbol{\Sigma}_s)_{i,j}}{\sqrt{(\boldsymbol{\Sigma}_s)_{i,i}(\boldsymbol{\Sigma}_s)_{j,j}}}, \quad (\mathbf{N})_{i,j} := \frac{(\boldsymbol{\Sigma}_x)_{i,j}}{\sqrt{(\boldsymbol{\Sigma}_x)_{i,i}(\boldsymbol{\Sigma}_x)_{j,j}}}, \quad \forall i, j = 1, 2, \dots, N. \quad (2)$$

129 We note that when spiking activity is directly observed using electrophysiology recordings, the  
130 conventional signal  $(\boldsymbol{\Sigma}_s^{\text{con}})_{i,j}$  and noise  $(\boldsymbol{\Sigma}_x^{\text{con}})_{i,j}$  covariances of spiking activity between the  $i^{\text{th}}$  and  
131  $j^{\text{th}}$  neuron are defined as (*Lyamzin et al., 2015*):

$$(\boldsymbol{\Sigma}_s^{\text{con}})_{i,j} := \text{cov} \left( \frac{1}{L} \sum_{l=1}^L n_{t,l}^{(i)}, \frac{1}{L} \sum_{l=1}^L n_{t,l}^{(j)} \right), \quad (\boldsymbol{\Sigma}_x^{\text{con}})_{i,j} := \frac{1}{L} \sum_{l=1}^L \text{cov} \left( n_{t,l}^{(i)} - \frac{1}{L} \sum_{l=1}^L n_{t,l}^{(i)}, n_{t,l}^{(j)} - \frac{1}{L} \sum_{l=1}^L n_{t,l}^{(j)} \right), \quad (3)$$

132 which after standard normalization in *Equation 2* give the conventional signal  $(\mathbf{S}^{\text{con}})_{i,j}$  and noise  
133  $(\mathbf{N}^{\text{con}})_{i,j}$  correlations. While at first glance our definitions of signal and noise covariances in  
134 *Equation 1* seem to be a far departure from the conventional ones in *Equation 3*, we show that the  
135 conventional notions of correlation indeed approximate the same quantities as in our definitions:

$$\mathbf{S}^{\text{con}} \approx \mathbf{S} \quad \text{and} \quad \mathbf{N}^{\text{con}} \approx \mathbf{N},$$

136 under asymptotic conditions (i.e.,  $T$  and  $L$  sufficiently large). We prove this assertion of asymptotic  
137 equivalence in *Appendix 1*, which highlights another facet of our contributions: our proposed  
138 estimators are designed to robustly operate in the regime of finite (and typically small)  $T$  and  $L$ ,  
139 aiming for the very same quantities that the conventional estimators could only recover accurately  
140 under ideal asymptotic conditions.

### 141 Existing methods used for performance comparison

142 In order to compare the performance of our proposed method with existing work, we consider  
143 three widely available methods for extracting neuronal correlations. In simulation studies, we  
144 additionally benchmark these estimates with respect to the known ground truth. The existing  
145 methods considered are the following:

#### 146 Pearson Correlations from the Two-Photon Data

147 In this method, fluorescence observations are assumed to be the direct measurements of spiking  
148 activity, and thus empirical Pearson correlations of the two-photon data are used to compute  
149 the signal and noise correlations (*Rothschild et al., 2010; Winkowski and Kanold, 2013; Francis*  
150 *et al., 2018; Bowen et al., 2020*). Explicitly, these estimates are obtained by simply replacing  $n_{t,l}^{(j)}$  in  
151 *Equation 3* by  $y_{t,l}^{(j)}$ , without performing spike deconvolution.

152 Two-stage Pearson Estimation

153 Unlike the previous method, in this case spikes are first inferred using a deconvolution technique.  
 154 Then, following temporal smoothing via a narrow Gaussian kernel the Pearson correlations are  
 155 computed using the conventional definitions of *Equation 3*. For spike deconvolution, we primarily  
 156 used the FCSS algorithm (*Kazemipour et al., 2018*). In order to also demonstrate the sensitivity of  
 157 these estimates to the deconvolution technique that is used, we provide a comparison with the  
 158 f-opsi deconvolution algorithm (*Pnevmatikakis et al., 2016*) in *Figure 2–Figure Supplement 1*.

159 Two-stage GPFA Estimation

160 Similar to the previous method, spikes are first inferred using a deconvolution technique. Then, a  
 161 latent variable model called Gaussian Process Factor Analysis (GPFA) (*Yu et al., 2009*) is applied to  
 162 the inferred spikes in order to estimate the latent covariates and receptive fields. Based on those  
 163 estimates, the signal and residual noise correlations are derived through a formulation similar to  
 164 *Equation 1* and *Equation 2* (*Ecker et al., 2014*).

165 **Simulation study 1: Neuronal ensemble driven by external stimulus**

166 We simulated calcium fluorescence observations according to the proposed generative model given  
 167 in *Methods and Materials*, from an ensemble of  $N = 8$  neurons for a duration of  $T = 5000$  time  
 168 frames. We considered  $L = 20$  repeated trials driven by the same external stimulus, which we  
 169 modeled by an autoregressive process (see *Methods and Materials* for details). *Figure 2* shows the  
 170 corresponding estimation results.

171 The first column of *Figure 2-A* shows the ground truth noise (top) and signal (bottom) correlations  
 172 (diagonal elements are all equal to 1 and omitted for visual convenience). The second column  
 173 shows estimates of the noise and signal correlations using our proposed method, which closely  
 174 match the ground truth. The third, fourth and fifth columns, respectively, show the results of the  
 175 Pearson correlations from the two-photon data, two-stage Pearson, and two-stage GPFA estimation  
 176 methods. Through a qualitative visual inspection, it is evident that these methods incur high false  
 177 alarms and mis-detections of the ground truth correlations.

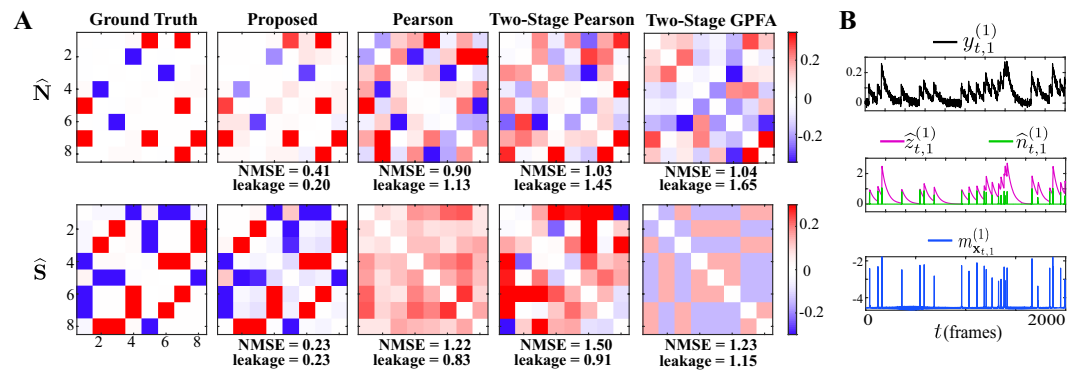

**Figure 2.** Results of simulation study 1. A) Estimated noise and signal correlation matrices from different methods. Rows from left to right: ground truth, proposed method, Pearson correlations from two-photon recordings, two-stage Pearson estimates and two-stage GPFA estimates. The normalized mean squared error (NMSE) of each estimate with respect to the ground truth and the leakage effect quantified by the ratio between out-of-network and in-network power (leakage) are indicated below each panel. B) Simulated fluorescence observations (black), estimated calcium concentrations (purple), putative spikes (green) and estimated mean of the latent state (blue) by the proposed method, for the first trial of neuron 1.

**Figure 2–Figure supplement 1.** Sensitivity of two-stage estimates to the choice of the underlying spike deconvolution technique.

**Figure 2–Figure supplement 2.** Performance of two-stage estimates based on ground truth spikes.

**Figure 2–Figure supplement 3.** Proposed estimates based on simulated data with model mismatch and at lower SNR.

178 To quantify these comparisons, the normalized mean square error (NMSE) of different estimates  
179 with respect to the ground truth are shown below each of the subplots (**Figure 2-A**). Our proposed  
180 method achieves the lowest NMSE compared to the others. Furthermore, we observed a significant  
181 mixing between signal and noise correlations in these other estimates. To quantify this leakage  
182 effect, we first classified each of the correlation entries as in-network or out-of-network, based  
183 on being non-zero or zero in the ground truth, respectively (see **Methods and Materials**). We then  
184 computed the ratio between the power of out-of-network components and the power of in-network  
185 components as a measure of leakage. The leakage ratios are also reported in **Figure 2-A**. The leakage  
186 of our proposed estimates is the lowest of all four techniques, in estimating both the signal and noise  
187 correlations. In order to further probe the performance of our proposed method, the simulated  
188 observations  $y_{t,1}^{(1)}$ , estimated calcium concentration  $\hat{z}_{t,1}^{(1)}$ , the putative spikes  $\hat{n}_{t,1}^{(1)} := \hat{z}_{t,1}^{(1)} - \alpha \hat{z}_{t-1,1}^{(1)}$ ,  
189 and the estimated mean of the latent state  $m_{x,1}^{(1)}$ , for the first trial of the first neuron are shown  
190 in **Figure 2-B**. These results demonstrate the ability of the proposed estimation framework in  
191 accurately identifying the latent processes, which in turn leads to an accurate estimation of the  
192 signal and noise correlations as shown in **Figure 2-B**.

193 The main sources of the observed performance gap between our proposed method and the  
194 existing ones are the bias incurred by treating the fluorescence traces as spikes, low spiking rates,  
195 non-linearity of spike generation with respect to intrinsic and external covariates, and sensitivity to  
196 spike deconvolution. For the latter, we demonstrated the sensitivity of the two-stage Pearson esti-  
197 mates to the choice of the deconvolution technique in **Figure 2-Figure Supplement 1**. Furthermore,  
198 in order to isolate the effect of said non-linearities on the estimation performance, we applied the  
199 two-stage methods to ground truth spikes in **Figure 2-Figure Supplement 2**. Our analysis showed  
200 that both two-stage estimates incur significant estimation errors even if the spikes were recovered  
201 perfectly, mainly due to the limited number of trials ( $L = 20$  here). In accordance with our theoretical  
202 analysis of the asymptotic behavior of the conventional signal and noise correlation estimates  
203 given in **Appendix 1**, we also showed in **Figure 2-Figure Supplement 2** that the performance of the  
204 two-stage Pearson estimates based on ground truth spikes, but using  $L = 1000$  trials, dramatically  
205 improves. Our proposed method, however, was capable of producing reliable estimates with the  
206 number of trials as low as  $L = 20$ , which is typical in two-photon imaging experiments.

207 Finally, since real data does not necessarily follow the proposed generative model, to test the  
208 robustness of the proposed algorithm and modeling framework (with first-order autoregressive  
209 calcium dynamics assumption as outlined in **Methods and Materials**), we applied our method on  
210 simulated data generated based on a mismatched model (second-order autoregressive calcium  
211 dynamics), and at a lower signal-to-noise ratio (SNR) compared to the setting of **Figure 2**. **Figure 2-**  
212 **Figure Supplement 3** shows the corresponding noise and signal correlations estimated by the  
213 proposed method under these conditions. Even though the performance slightly degrades (in  
214 terms of NMSE and leakage), our method is able to recover the underlying correlations faithfully  
215 under model mismatch and low SNR.

## 216 **Simulation study 2: Spontaneous activity**

217 Next, we present the results of a simulation study in the absence of external stimuli (i.e.  $s_t = \mathbf{0}$ ),  
218 pertaining to the spontaneous activity condition. It is noteworthy that the proposed method can  
219 readily be applied to estimate noise correlations during spontaneous activity, by simply setting  
220 the external stimulus  $s_t$  and the receptive field  $\mathbf{d}_j$  to zero in the update rules (see **Methods and**  
221 **Materials** for details). We simulated the ensemble spiking activity based on a Poisson process  
222 (**Smith and Brown, 2003**) using a discrete time-rescaling procedure (**Brown et al., 2002; Smith and**  
223 **Brown, 2003**), so that the data are generated using a different model than that used in our inference  
224 framework (i.e., Bernoulli process with a logistic link as outlined in **Methods and Materials**). As such,  
225 we eliminated potential performance biases in favor of our proposed method by introducing the  
226 aforementioned model mismatch. We simulated  $L = 20$  independent trials of spontaneous activity  
227 of  $N = 30$  neurons, observed for a time duration of  $T = 5000$  time frames. The number of neurons

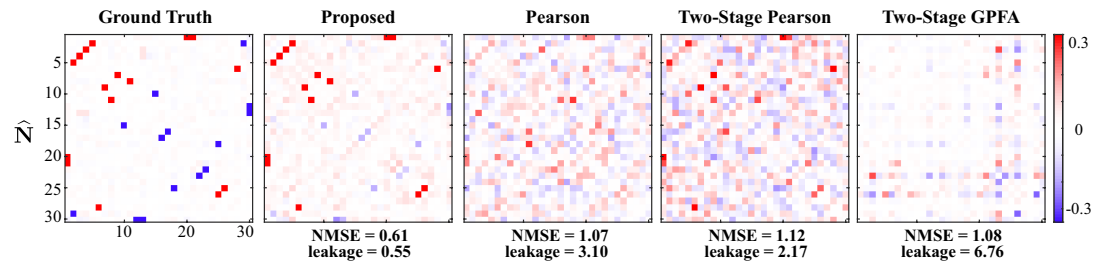

**Figure 3.** Results of simulation study 2. Estimated noise correlation matrices using different methods based from spontaneous activity data. Rows from left to right: ground truth, proposed method, Pearson correlations from two-photon recordings, two-stage Pearson and two-stage GPFA estimates. The normalized mean squared error (NMSE) of each estimate with respect to the ground truth and the ratio between out-of-network power and in-network power (leakage) are shown below each panel.

228 in this study is notably larger than that used in the previous one, to examine the scalability of our  
 229 proposed approach with respect to the ensemble size.

230 **Figure 3** shows the comparison of the noise correlation matrices estimated by our proposed  
 231 method, Pearson correlations from two-photon recordings, two-stage Pearson, and two-stage GPFA  
 232 estimates, with respect to the ground truth. The Pearson and the two-stage estimates are highly  
 233 variable and result in excessive false detections. Our proposed estimate, however, closely follows  
 234 the ground truth, which is also reflected by the comparatively lower NMSE and leakage ratios, in  
 235 spite of the mismatch between the models used for data generation and inference. It is noteworthy  
 236 that the proposed method exhibits favorable scaling with respect to the ensemble size, thanks to  
 237 the underlying low-complexity variational updates (see [Methods and Materials](#)).

### 238 **Real data study 1: Mouse auditory cortex under random tone presentation**

239 We next applied our proposed method to experimentally recorded two-photon observations from  
 240 the mouse primary auditory cortex (A1). The dataset consisted of recordings from 371 excitatory  
 241 neurons in layer 2/3 A1, from which we selected  $J = 16$  neurons which exhibited the highest level of  
 242 activity. A random sequence of four tones was presented to the mouse, with the same sequence  
 243 being repeated for  $L = 10$  trials. Each trial consisted of  $T = 3600$  time frames, and each tone  
 244 was two seconds long followed by a four-second silent period (see [Methods and Materials](#) for  
 245 details). The comparison of the noise and signal correlation estimates obtained by our proposed  
 246 method, Pearson correlations from two-photon recordings, two-stage Pearson and two-stage GPFA  
 247 methods is shown in **Figure 4-A**. The spatial map of the 16 neurons considered in the analysis in the  
 248 field of view is shown in **Figure 4-B**. **Figure 4-C** shows the stimulus tone sequence  $s_t$ , two-photon  
 249 observations  $y_{t,1}^{(1)}$ , estimated calcium concentration  $\hat{z}_{t,1}^{(1)}$ , putative spikes  $\hat{n}_{t,1}^{(1)} := \hat{z}_{t,1}^{(1)} - \alpha \hat{z}_{t-1,1}^{(1)}$  and the  
 250 estimated mean of the latent state  $m_{x,1}^{(1)}$ , for the first trial of the first neuron.

251 We estimated the Best Frequency (BF) of each neuron as the tone that resulted in the highest  
 252 level of fluorescence activity. The results in **Figure 4-A** are organized such that the neurons with  
 253 the same BF are neighboring, with the BF increasing along the diagonal. Thus, expectedly ([Bowen  
 254 et al., 2020](#)) our proposed method as well as the Pearson and two-stage Pearson estimates show  
 255 high signal correlations along the diagonal. However, the two-stage GPFA estimates do not reveal  
 256 such a structure. By visual inspection, as also observed in the simulation studies, the Pearson  
 257 correlations from two-photon recordings, two-stage Pearson and two-stage GPFA estimates have  
 258 significant leakage between the signal and noise correlations, whereas our proposed signal and  
 259 noise correlation estimates in **Figure 4-A** suggest distinct spatial structures.

260 To quantify this visual comparison, we used a statistic based on the Tanimoto similarity metric  
 261 ([Lipkus, 1999](#)), denoted by  $T_s(\mathbf{X}, \mathbf{Y})$  for two matrices  $\mathbf{X}$  and  $\mathbf{Y}$ . As a measure of dissimilarity, we  
 262 used  $T_d(\mathbf{X}, \mathbf{Y}) := 1 - T_s(\mathbf{X}, \mathbf{Y})$  (see [Methods and Materials](#)). The comparison of  $T_d(\hat{\mathbf{S}}, \hat{\mathbf{N}})$  for the four  
 263 estimates is presented in the second column of **Table 1**. To assess statistical significance, for each

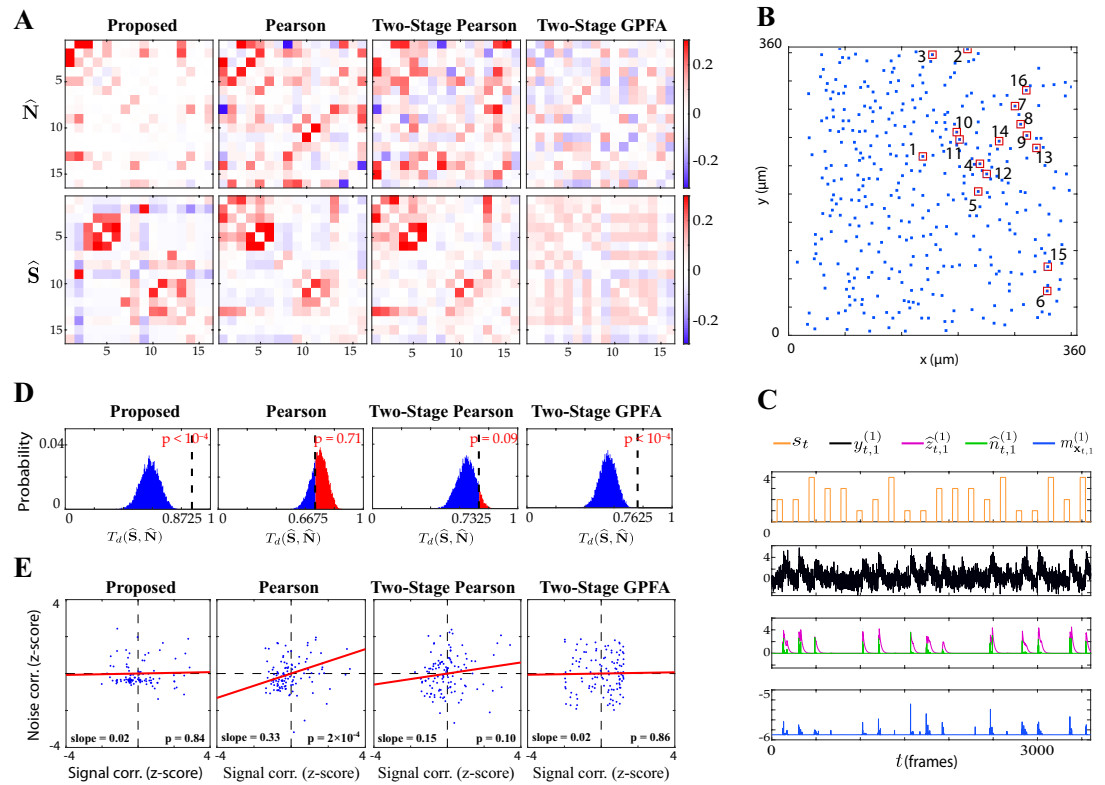

**Figure 4.** Application to experimentally-recorded data from the mouse A1. A) Estimated noise (top) and signal (bottom) correlation matrices using different methods. Rows from left to right: proposed method, Pearson correlations from two-photon data, two-stage Pearson and two-stage GPFA estimates. B) Location of the selected neurons with the highest activity in the field of view. C) Presented tone sequence (orange), observations (black), estimated calcium concentrations (purple), putative spikes (green) and estimated mean latent state (blue) in the first trial of the first neuron. D) Null distributions of chance occurrence of dissimilarities between signal and noise correlation estimates using different methods. The observed test statistic in each case is indicated by a dashed vertical line. E) Scatter plots of signal vs. noise correlations for individual cell pairs (blue dots) corresponding to each method. Data were normalized for comparison by computing z-scores. For each case, the linear regression model fit is shown in red, and the slope and p-value of the t-test are indicated as insets.

**Table 1.** Dissimilarity metric statistics for the estimates in **Figure 4-A** (also illustrated in **Figure 4-D**), linear regression statistics of the comparison between signal and noise correlations in **Figure 4-E**, and the average NMSE across 50 trials used in the shuffling procedure illustrated in **Figure 5-A**.

| Estimate          | Dissimilarity $T_d(\hat{S}, \hat{N})$<br>( <b>Figure 4-D</b> ) | Regression statistics ( <b>Figure 4-E</b> ) |                      | Shuffling test ( <b>Figure 5</b> ) |                    |
|-------------------|----------------------------------------------------------------|---------------------------------------------|----------------------|------------------------------------|--------------------|
|                   |                                                                | slope (p-value)                             | R <sup>2</sup> value | NMSE in $\hat{N}$                  | NMSE in $\hat{S}$  |
| Proposed          | <b>0.8725</b> ( $p < 10^{-4}$ )                                | 0.02 ( $p = 0.84$ )                         | $4 \times 10^{-4}$   | <b>1.07 ± 0.16</b>                 | <b>1.32 ± 0.19</b> |
| Pearson           | 0.6675 ( $p = 0.71$ )                                          | 0.33 ( $p = 2 \times 10^{-4}$ )             | 0.11                 | 0                                  | 0                  |
| Two-Stage Pearson | 0.7325 ( $p = 0.09$ )                                          | 0.15 ( $p = 0.10$ )                         | 0.02                 | $1.84 \pm 0.34$                    | $0.55 \pm 0.12$    |
| Two-Stage GPFA    | 0.7625 ( $p < 10^{-4}$ )                                       | 0.02 ( $p = 0.86$ )                         | $3 \times 10^{-4}$   | $2.32 \pm 0.52$                    | $2.26 \pm 0.51$    |

264 comparison we obtained null distributions corresponding to chance occurrence of dissimilarities  
 265 using a shuffling procedure as shown in **Figure 4-D**, and then computed one-tailed  $p$ -values from  
 266 those distributions (see Methods and Materials for details). **Table 1** and **Figure 4-D** includes these  
 267  $p$ -values, which show that the proposed estimates (boldface numbers in **Table 1**, second column)  
 268 indeed have the highest dissimilarity between signal and noise correlations. The higher leakage  
 269 effect in the other three estimates is also reflected in their smaller  $T_d(\hat{S}, \hat{N})$  values. To further



270 investigate this effect, we have depicted the scatter plots of signal vs. noise correlations estimated  
 271 by each method in **Figure 4-E**. To examine the possibility of the leakage effect on a pairwise basis,  
 272 we performed linear regression in each case. The slope of the model fit, the p-value for the  
 273 corresponding t-test, and the  $R^2$  values are reported in the third and fourth columns of **Table 1** (the  
 274 slope and p-values are also shown as insets in **Figure 4-E**). Consistent with the results of *Winkowski*  
 275 *and Kanold (2013)*, the Pearson estimates suggest a significant correlation between the signal and  
 276 noise correlation pairs (as indicated by the higher slope in **Figure 4-E**). However, it is noteworthy that  
 277 none of the other estimates (including the proposed estimates) in **Figure 4-E** register a significant  
 278 trend between signal and noise correlations. This further corroborates our assessment of the  
 279 high leakage between signal and noise correlations in Pearson estimates, since such a leakage  
 280 effect could result in overestimation of the trend between the signal and noise correlation pairs.  
 281 It is noteworthy that the signal and noise correlations estimated by our proposed method show  
 282 no pairwise trend, suggesting distinct patterns of stimulus-dependent and stimulus-independent  
 283 functional connectivity.

284 Given that the ground truth correlations are not available for a direct comparison, we instead  
 285 performed a test of specificity that reveals another key limitation of existing methods. Fluorescence  
 286 observations exhibit structured dynamics due to the exponential intracellular calcium concentration  
 287 decay (as shown in **Figure 4-C**, for example), which are in turn related to the underlying spikes that  
 288 are driven non-linearly by intrinsic/extrinsic stimuli as well as the properties of the indicator used.  
 289 As such, an accurate inference method is expected to be specific to this temporal structure. To  
 290 test this, we randomly shuffled the  $T$  time frames consistently in the same order in all trials, in  
 291 order to fully break the temporal structure governing calcium decay dynamics, and then estimated  
 292 correlations from these shuffled data using the different methods. The resulting estimates of noise  
 293 correlations are shown in **Figure 5-A** for one instance of such shuffled data. The average NMSE  
 294 for a total of 50 shuffled samples with respect to the original un-shuffled estimates (in **Figure 4-A**)  
 295 are tabulated in the fifth and sixth columns of **Table 1**, and are also indicated below each panel in  
 296 **Figure 5-A**.

297 A visual inspection of **Figure 5-A** shows that the Pearson correlations from two-photon recordings  
 298 expectedly remain unchanged. Since this method treats each time frame to be independent,  
 299 temporal shuffling does not impact the correlations in anyway. On the other extreme, both of the

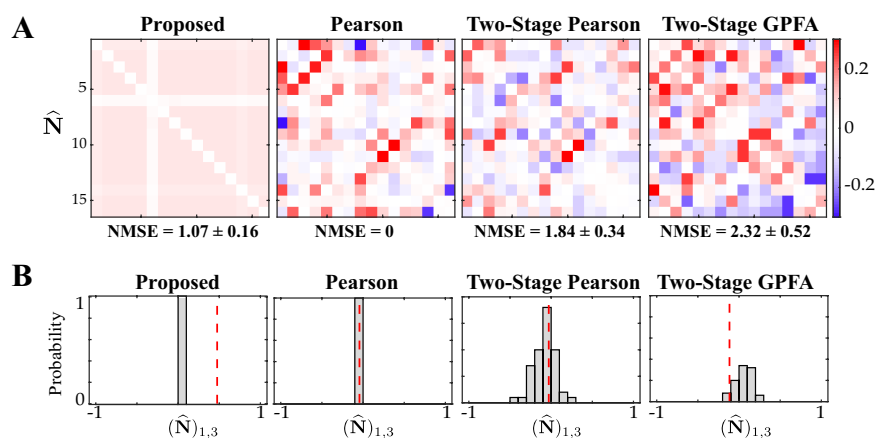

**Figure 5.** Assessing the specificity of different estimation results shown in **Figure 4**. Rows from left to right: proposed method, Pearson correlations from two-photon data, two-stage Pearson and two-stage GPFA estimates. A) The estimated noise correlations using different methods after random temporal shuffling of the observations. The mean and standard deviation of the NMSE across 50 trials are indicated below each panel. B) Histograms of the noise correlation estimates between the first and third neurons over the 50 temporal shuffling trials. The estimate based on the original (un-shuffled) data in each case is indicated by a dashed vertical line.

300 two-stage estimates seem to detect highly variable and large correlation values, despite operating  
 301 on data that lacks any relevant temporal structure. Our proposed method, however, remarkably  
 302 produces negligible correlation estimates. Although both the two-stage and proposed estimates  
 303 show variability with respect to the shuffled data (**Table 1**), the standard deviation of the NMSE  
 304 values of our proposed method are considerably smaller than those of the two-stage methods  
 305 (**Table 1**, fifth column). For further inspection, the histograms of a single element ( $(\hat{\mathbf{N}})_{1,3}$ ) of the  
 306 estimated correlation matrices across the 50 shuffling trials are shown in **Figure 5-B**. The original  
 307 un-shuffled estimates are marked by the dashed vertical lines in each case. The proposed estimate  
 308 in **Figure 5-B** is highly concentrated around zero, even though the un-shuffled estimate is non-  
 309 zero. However, the two-stage estimates produce correlations that are widely variable across the  
 310 shuffling trials. This analysis demonstrates that our proposed method is highly specific to the  
 311 temporal structure of fluorescence observations, whereas the Pearson correlations from two-  
 312 photon recordings, two-stage Pearson and two-stage GPFA methods fail to be specific.

### 313 Real data study 2: Spontaneous vs. stimulus-driven activity in the mouse A1

314 To further validate the utility of our proposed methodology, we applied it to another experimentally-  
 315 recorded dataset from the mouse layer 2/3 A1. This experiment pertained to trials of presenting a  
 316 sequence of short white noise stimuli, randomly interleaved with silent trials of the same duration.  
 317 The two-photon recordings thus contained episodes of stimulus-driven and spontaneous activity  
 318 (see **Methods and Materials** for details). Under these experimental conditions, it is expected that  
 319 the noise correlations are invariant across the spontaneous and stimulus-driven conditions, and  
 320 that the signal and noise correlation patterns are distinct (**Kohn et al., 2016; Montijn et al., 2014;**  
 321 **Rothschild et al., 2010; Keeley et al., 2020**). Each trial consisted of  $T = 765$  frames. We selected  
 322  $N = 10$  neurons with the highest level of activity for the analysis, each with  $L = 10$  trials.

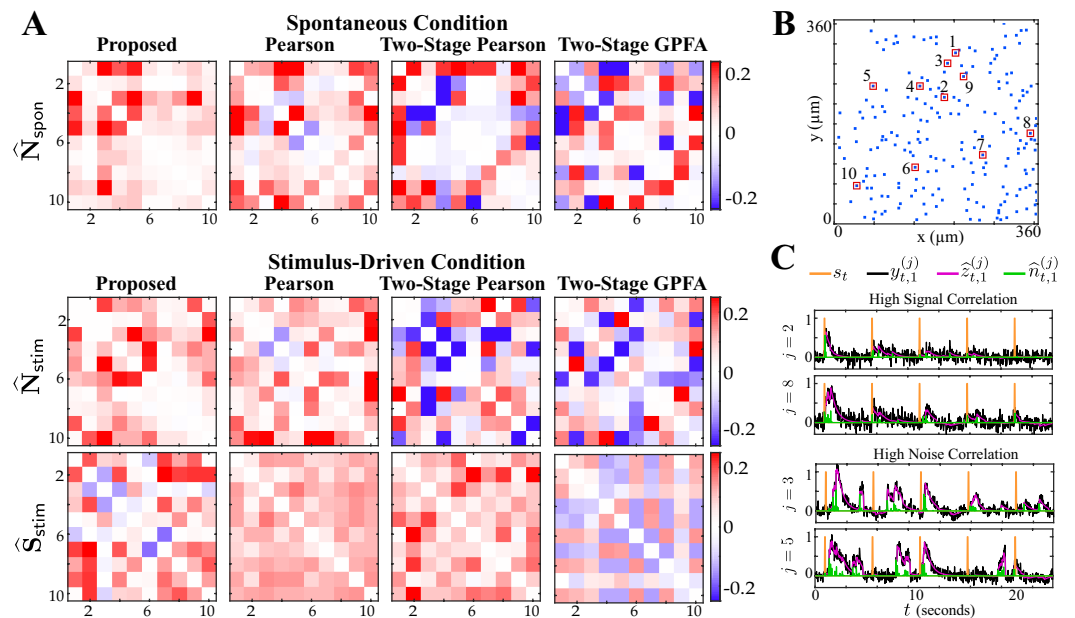

**Figure 6.** Comparison of spontaneous and stimulus-driven activity in the mouse A1. A) Estimated noise and signal correlation matrices under spontaneous (top) and stimulus-driven (bottom) conditions. Rows from left to right: proposed method, Pearson correlations from two-photon data, two-stage Pearson and two-stage GPFA estimates. B) Location of the selected neurons with highest activity in the field of view. C) Stimulus onsets (orange), observations (black), estimated calcium concentrations (purple) and putative spikes (green) for the first trial from two pairs of neurons with high signal correlation (top) and high noise correlation (bottom), as identified by the proposed estimates.

**Figure 6-Figure supplement 1.** Histograms of the similarity/dissimilarity metrics under the shuffling procedure.

**Table 2.** Similarity/dissimilarity metric statistics for the estimates in **Figure 6**.

| Estimation Method | $T_s(\hat{N}_{\text{spon}}, \hat{N}_{\text{stim}})$ | $T_d(\hat{S}_{\text{stim}}, \hat{N}_{\text{stim}})$ |
|-------------------|-----------------------------------------------------|-----------------------------------------------------|
| Proposed          | <b>0.5518</b> ( $p = 0.01$ )                        | <b>0.7625</b> ( $p = 0.01$ )                        |
| Pearson           | 0.3031 ( $p = 0.61$ )                               | 0.5025 ( $p = 0.92$ )                               |
| Two-Stage Pearson | 0.2790 ( $p = 0.05$ )                               | 0.7925 ( $p = 0.39$ )                               |
| Two-Stage GPFA    | 0.2008 ( $p = 0.50$ )                               | 0.7825 ( $p = 0.22$ )                               |

323 **Figure 6-A** shows the resulting noise and signal correlation estimates under the spontaneous  
324 ( $\hat{N}_{\text{spon}}$ , top) and stimulus-driven ( $\hat{N}_{\text{stim}}$  and  $\hat{S}_{\text{stim}}$ , bottom) conditions. **Figure 6-B** shows the spatial map  
325 of the 10 neurons considered in the analysis in the field of view. A visual inspection of the first  
326 column of **Figure 6-A** indeed suggests that  $\hat{N}_{\text{spon}}$  and  $\hat{N}_{\text{stim}}$  are saliently similar, and distinct from  
327  $\hat{S}_{\text{stim}}$ . The Pearson correlations obtained from two-photon data (second column) and the two-stage  
328 Pearson and GPFA estimates (third and fourth columns, respectively), however, evidently lack this  
329 structure. As in the previous study, we quantified this visual comparison using the similarity metric  
330  $T_s(\mathbf{X}, \mathbf{Y})$  and the dissimilarity metric  $T_d(\mathbf{X}, \mathbf{Y})$  (see **Methods and Materials** for details). These statistics  
331 are reported in **Table 2** along with the  $p$ -values (null distributions are shown in **Figure 6-Figure**  
332 **Supplement 1**), which show that the only significant outcomes (boldface numbers) are those of our  
333 proposed method.

334 Furthermore, **Figure 6-C** shows the time course of the stimulus, observations, estimated calcium  
335 concentrations and putative spikes for the first trial from two pairs of neurons with high signal  
336 correlation ( $j = 2, 8$ , top) and high noise correlation ( $j = 3, 5$ , bottom). As expected, the putative  
337 spiking activity of the neurons with high signal correlation (top) are closely time-locked to the  
338 stimulus onsets. The activity of the two neurons with high noise correlation (bottom), however,  
339 is not time-locked to the stimulus onsets, even though the two neurons exhibit highly correlated  
340 activity. The correlations estimated via the proposed method thus encode substantial information  
341 about the inter-dependencies of the spiking activity of the neuronal ensemble.

342 **Real data study 3: Spatial analysis of signal and noise correlations in the mouse A1**  
343 Lastly, we applied our proposed method to examine the spatial distribution of signal and noise  
344 correlations in the mouse A1 layers 2/3 and 4 (data from **Bowen et al. (2020)**). The dataset included  
345 fluorescence activity recorded during multiple experiments of presenting sinusoidal amplitude-  
346 modulated tones, with each stimulus being repeated across several trials (see **Methods and Ma-**  
347 **terials and Bowen et al. (2020)** for experimental details). In each experiment, we selected around  
348 20 neurons with highest spiking rates for the subsequent analysis. For brevity, we compare the  
349 estimates of signal and noise correlations using our proposed method only with those obtained  
350 by Pearson correlations from the two-photon data. The latter method was also used in previous  
351 analyses of data from this experimental paradigm (**Winkowski and Kanold, 2013**).

352 In parallel to the results reported in **Winkowski and Kanold (2013)**, **Figure 7-A** and **Figure 7-B**  
353 illustrate the correlation between the signal and noise correlations in layers 2/3 and 4, respectively.  
354 Consistent with the results of **Winkowski and Kanold (2013)**, the signal and noise correlations  
355 exhibit positive correlation in both layers, regardless of the method used. However, the correlation  
356 coefficients (i.e., slopes in the insets) identified by our proposed method are notably smaller than  
357 those obtained from Pearson correlations, in both layer 2/3 (**Figure 7-A**) and layer 4 (**Figure 7-B**).  
358 Comparing this result with our simulation studies suggests that the stronger linear trend between  
359 the signal and noise correlations observed using the Pearson correlation estimates is likely due to  
360 the mixing between the estimates of signal and noise correlations. As such, our method suggests  
361 that the signal and noise correlations may not be as highly correlated with one another as indicated  
362 in previous studies of layer 2/3 and 4 in mouse A1.

363 Next, to evaluate the spatial distribution of signal and noise correlations, we plotted the cor-

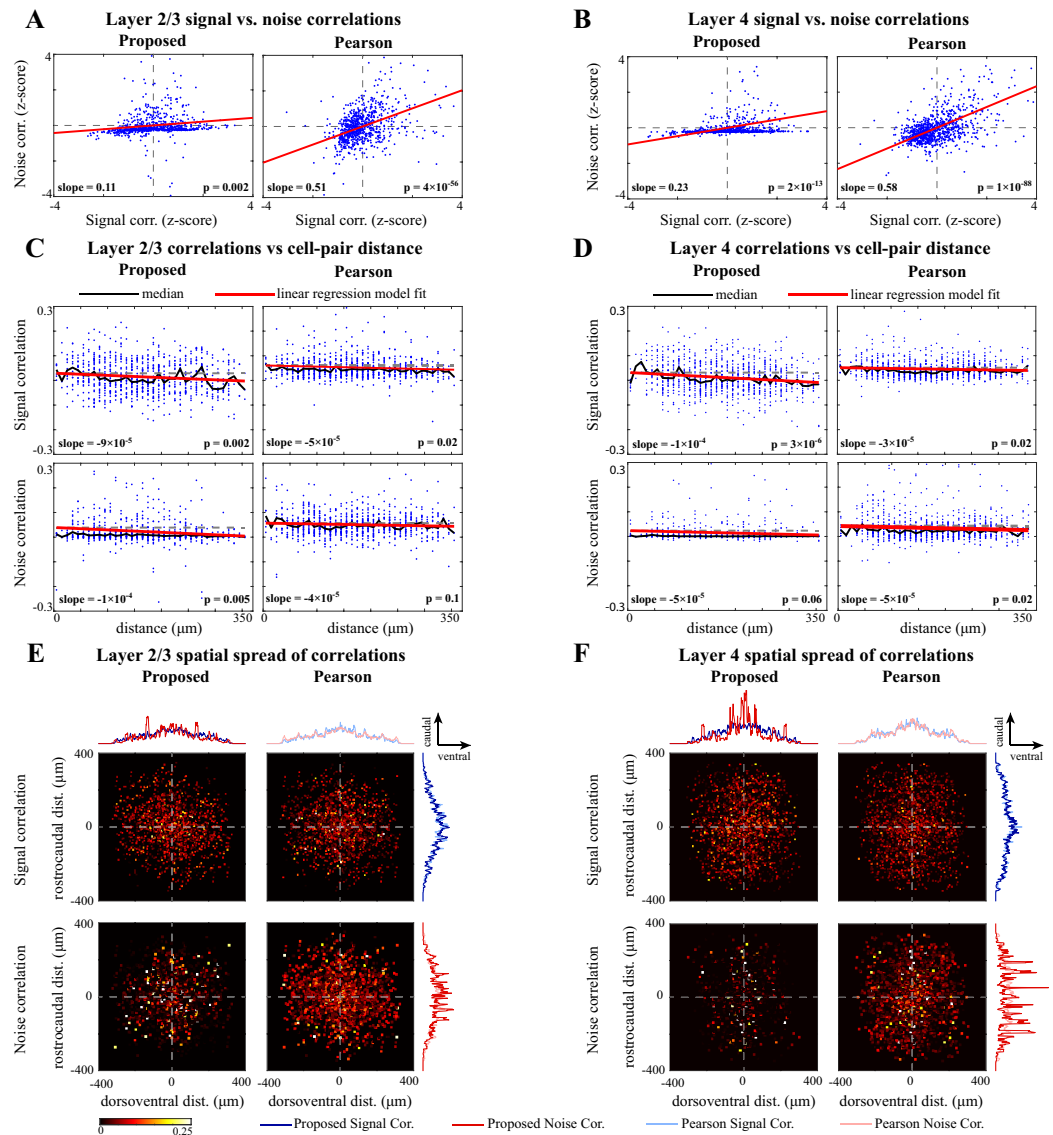

**Figure 7.** Comparison of signal and noise correlations across layers 2/3 and 4. A) Scatter-plot of noise vs. signal correlations (blue) for individual cell-pairs in layer 2/3, based on the proposed (left) and Pearson estimates (right). Data were normalized for comparison by computing z-scores. The linear model fits are shown in red, and the slope and p-value of the t-tests are indicated as insets. Panel B corresponds to layer 4 in the same organization as panel A. C) Signal (top) and noise (bottom) correlations vs. cell-pair distance in layer 2/3, based on the proposed (left) and Pearson estimates (right). Distances were binned to 10  $\mu\text{m}$  intervals. The median of the distributions (black) and the linear model fit (red) are shown in each panel. The slope of the linear model fit, and the p-value of the t-test are also indicated as insets. Dashed horizontal lines indicate the zero-slope line for ease of visual comparison. Panel D corresponds to layer 4 in the same organization as panel C. E) Spatial spread of signal (top) and noise (bottom) correlations in layer 2/3, based on the proposed (left) and Pearson estimates (right). The horizontal and vertical axes in each panel respectively represent the relative dorsoventral and rostrocaudal distances between each cell-pair, and the heat-map indicates the magnitude of correlations. Marginal distributions of the signal (blue) and noise (red) correlations along the dorsoventral and rostrocaudal axes for the proposed method (darker colors) and Pearson method (lighter colors) are shown at the top and right side of the sub-panels. Panel F corresponds to layer 4 in the same organization as panel E.

**Figure 7-Figure supplement 1.** Comparing the marginal distributions of signal and noise correlations along the dorsoventral and rostrocaudal axes.

**Figure 7-Figure supplement 2.** Marginal angular distributions of signal and noise correlations.

**Table 3.** Linear regression statistics for the analysis of correlations vs. cell-pair distance

| Correlations          | Statistics of layer 2/3 correlations                  |                      | Statistics of layer 4 correlations                               |                      |
|-----------------------|-------------------------------------------------------|----------------------|------------------------------------------------------------------|----------------------|
|                       | slope (p-value)                                       | R <sup>2</sup> value | slope (p-value)                                                  | R <sup>2</sup> value |
| Proposed Signal Corr. | <b><math>-9 \times 10^{-5}</math></b> ( $p = 0.002$ ) | 0.012                | <b><math>-1 \times 10^{-4}</math></b> ( $p = 3 \times 10^{-6}$ ) | 0.023                |
| Pearson Signal Corr.  | $-5 \times 10^{-5}$ ( $p = 0.02$ )                    | 0.007                | $-3 \times 10^{-5}$ ( $p = 0.02$ )                               | 0.005                |
| Proposed Noise Corr.  | <b><math>-1 \times 10^{-4}</math></b> ( $p = 0.005$ ) | 0.010                | <b><math>-5 \times 10^{-5}</math></b> ( $p = 0.06$ )             | 0.004                |
| Pearson Noise Corr.   | $-4 \times 10^{-5}$ ( $p = 0.1$ )                     | 0.003                | $-5 \times 10^{-5}$ ( $p = 0.02$ )                               | 0.005                |

364 relation values for pairs of neurons as a function of their distance for layer 2/3 (**Figure 7-C**) and  
 365 layer 4 (**Figure 7-D**). The distances were discretized using bins of length 10  $\mu\text{m}$ . The scatter of the  
 366 correlations along with their median at each bin are shown in all panels. Then, to examine the  
 367 spatial trend of the correlations, we performed linear regression in each case. The slope of the  
 368 model fit, the p-value for the corresponding t-test, and the R<sup>2</sup> values are reported in **Table 3** (the  
 369 slope and p-values are also shown as insets in **Figure 7-C & D**).

370 From **Table 3** and **Figure 7-C & D** (upper panels), it is evident that the signal correlations show a  
 371 significant negative trend with respect to distance, using both methods and in both layers. However,  
 372 the slope of these negative trends identified by our method (boldface numbers in **Table 3**) is notably  
 373 steeper than those identified by Pearson correlations. On the other hand, the trends of the noise  
 374 correlations with distance (bottom panels) are different between our proposed method and Pearson  
 375 correlations: our proposed method shows a significant negative trend in layer 2/3, but not in layer  
 376 4, whereas the Pearson correlations of the two-photon data suggest a significant negative trend  
 377 in layer 4, but not in layer 2/3. In addition, the slopes of these negative trends identified by our  
 378 method (boldface numbers in **Table 3**) are steeper than or equal to those identified by Pearson  
 379 correlations.

380 Our proposed estimates indicate that noise correlations are sparser and less widespread in layer  
 381 4 (**Figure 7-D**) than in layer 2/3 (**Figure 7-C**). To further investigate this observation, we depicted the  
 382 two-dimensional spatial spread of signal and noise correlations in both layers and for both methods  
 383 in **Figure 7-E & F**, by centering each neuron at the origin and overlaying the individual spatial spreads.  
 384 The horizontal and vertical axes in each panel respectively represent the relative dorsoventral and  
 385 rostrocaudal distances, and the heat-maps represent the magnitude of correlations. Comparing  
 386 the proposed noise correlation spread in **Figure 7-E** with the corresponding spread in **Figure 7-F**,  
 387 we observe that the noise correlations in layer 2/3 are indeed more widespread and abundant than  
 388 in layer 4.

389 It is notable that the spatial spreads of signal and noise correlations based on the Pearson  
 390 estimates are remarkably similar in both layers (**Figure 7-E & F**, right panels), whereas they are  
 391 saliently different for our proposed estimates (**Figure 7-E & F**, left panels). This further corroborates  
 392 our hypothesis on the possibility of high mixing between the signal and noise correlation estimates  
 393 obtained by the Pearson correlation of two-photon data. To further examine the differences  
 394 between the signal and noise correlations, the marginal distributions along the dorsoventral and  
 395 rostrocaudal axes are shown in **Figure 7-E & F**, selectively overlaid for ease of visual comparison.  
 396 To quantify the differences between the spatial distributions of signal and noise correlations  
 397 estimated by each method, we performed Kolmogorov–Smirnov (KS) tests on each pair of marginal  
 398 distributions, which are summarized in **Figure 7–Figure Supplement 1**. Although the marginal  
 399 distributions of signal and noise correlations are significantly different in all cases from both  
 400 methods, the effect sizes of their difference (KS statistics) are notably higher for our proposed  
 401 estimates compared to those of the Pearson estimates.

402 Finally, it is noteworthy that the spatial spreads of correlations for either method and in each  
 403 layer suggest non-uniform angular distributions with possibly directional bias. To test this effect, we  
 404 computed the angular marginal distributions and performed KS tests for non-uniformity, which are

405 reported in **Figure 7–Figure Supplement 2**. These tests indicate that all distributions are significantly  
 406 non-uniform. In addition, the angular distributions of both signal and noise correlations in layer 4  
 407 exhibit salient modes in the rostrocaudal direction, whereas they are less directionally selective in  
 408 layer 2/3 (**Figure 7–Figure Supplement 2**).

409 In summary, the spatial trends identified by our proposed method are consistent with empirical  
 410 observations of spatially heterogeneous pure-tone frequency tuning by individual neurons in  
 411 auditory cortex (**Winkowski and Kanold, 2013**). The improved correspondence of our proposed  
 412 method compared to results obtained using Pearson correlations could be the result of the demixing  
 413 of signal and noise correlations in our method. As a result of the demixing, our proposed method  
 414 also suggests that noise correlations have a negative trend with distance in layer 2/3, but are much  
 415 sparser and spatially flat in layer 4. In addition, the spatial spread patterns of signal and noise  
 416 correlations are more structured and remarkably more distinct for our proposed method than  
 417 those obtained by the Pearson estimates.

### 418 **Theoretical analysis of the bias and variance of the proposed estimators**

419 Finally, we present a theoretical analysis of the bias and variance of the proposed estimator.  
 420 Note that our proposed estimation method has been developed as a scalable alternative to the  
 421 intractable maximum likelihood (ML) estimation of the signal and noise covariances (see **Methods**  
 422 **and Materials**). In order to benchmark our estimates, we thus need to evaluate the quality of said  
 423 ML estimates. To this end, we derived bounds on the bias and variance of the ML estimators of the  
 424 kernel  $\mathbf{d}_j$  for  $j = 1, \dots, N$  and the noise covariance  $\Sigma_x$ . In order to simplify the treatment, we posit  
 425 the following mild assumptions:

426 *Assumption (1).* We assume a scalar time-varying external stimulus (i.e.  $s_t = s_{t'}$ , and hence  
 427  $\mathbf{d}_j = d_j$ ,  $\mathbf{d} = [d_1, d_2, \dots, d_N]^T$ ). Furthermore, we set the observation noise covariance to be  $\Sigma_w = \sigma_w^2 \mathbf{I}$ ,  
 428 for notational convenience.

429 *Assumption (2).* We derive the performance bounds in the regime where  $T$  and  $L$  are large,  
 430 and thus do not impose any prior distribution on the correlations, which are otherwise needed to  
 431 mitigate overfitting (see **Methods and Materials**).

432 *Assumption (3).* We assume the latent noise process and stimulus to be slowly varying signals, and  
 433 thus adopt a piece-wise constant model in which these processes are constant within consecutive  
 434 windows of length  $W$  (i.e.,  $\mathbf{x}_{t,l} = \mathbf{x}_{W_k,l}$  and  $s_t = s_{W_k}$ , for  $(k-1)W + 1 \leq t < kW$  and  $k = 1, \dots, K$  with  
 435  $W_k = (k-1)W + 1$  and  $KW = T$ ) for our theoretical analysis, as is usually done in spike count  
 436 calculations for conventional noise correlation estimates.

437 Our main theoretical result is as follows:

**Theorem 1** (Performance Bounds). *Let  $q > \frac{1}{64}$ ,  $0 < \epsilon < 1/2$ , and  $0 < \eta \leq 1/2$  be fixed constants,  $\sigma_m^2 := \max_i (\Sigma_x)_{i,i}$  and  $\sigma_s^2 := \frac{1}{K} \sum_{k=1}^K s_{W_k}^2$ . Then, under Assumptions (1) - (3), the bias and variance of the maximum likelihood estimators  $\hat{\mathbf{d}}$  and  $\hat{\Sigma}_x$ , conditioned on an event  $\mathcal{A}_W$  with  $\mathbb{P}(\mathcal{A}_W) \geq 1 - \eta$  satisfy:*

$$\left| \text{bias}_{\mathcal{A}_W}(\hat{d}_j) \right| \leq \frac{1}{\sqrt{W^{1-2\epsilon}}} C_1 \left( 2\sigma_w \sqrt{1 + \alpha^2} + 1 \right) + \tau_j,$$

$$\sqrt{\text{Var}_{\mathcal{A}_W}(\hat{d}_j)} \leq \sqrt{\frac{(\Sigma_x)_{j,j}}{KL\sigma_s^2(1-\eta)}} + \frac{1}{\sqrt{W^{1-2\epsilon}}} C_2 \left( 2\sigma_w \sqrt{1 + \alpha^2} + 1 \right) + \tilde{\tau}_j,$$

$$\left| \text{bias}_{\mathcal{A}_W}((\hat{\Sigma}_x)_{i,j}) \right| \leq \frac{|\Sigma_x)_{i,j}|}{KL(1-\eta)} + \sqrt{\frac{\log W}{W^{1-2\epsilon}}} C_3 \left( 14\sigma_w \sqrt{1 + \alpha^2} + 3 \right) + \xi_{i,j},$$

$$\sqrt{\text{Var}_{\mathcal{A}_W}((\hat{\Sigma}_x)_{i,j})} \leq \sqrt{\frac{(KL-1)((\Sigma_x)_{i,j}^2 + (\Sigma_x)_{i,i}(\Sigma_x)_{j,j})}{K^2L^2(1-\eta)}} + \sqrt{\frac{\log W}{W^{1-2\epsilon}}} C_4 \left( 2\sigma_w \sqrt{1 + \alpha^2} + 1 \right) + \tilde{\xi}_{i,j},$$

438 *for all  $i, j = 1, 2, \dots, N$ , if  $\log W \geq \max \left\{ \frac{\log(8KLN/\eta)}{q}, \frac{32\sigma_m^2 q}{\epsilon^2}, \frac{2\log(64q)}{1-2\epsilon}, \frac{\max\{6.25, 4(\|\mu_s\|_\infty + \max_{k,j} \{|s_{W_k} d_j|\})\}}{8q\sigma_m^2}, \log 2 \right\}$*

439 where  $\tau_j$  and  $\tilde{\tau}_j$  denote bounded terms that are  $\mathcal{O}(\sigma_w^2)$  or  $\mathcal{O}\left(\frac{1}{W}\right)$ ,  $\xi_{i,j}$  and  $\tilde{\xi}_{i,j}$  denote bounded terms that  
440 are  $\mathcal{O}(\sigma_w^2)$  or  $\mathcal{O}\left(\frac{1}{W^{1-2\epsilon}}\right)$  and  $C_1, C_2, C_3$  and  $C_4$  are bounded constants given in **Appendix 2**.

441 *Proof.* The proof of Theorem 1 is provided in **Appendix 2**. □

442 In order to discuss the implications of this theoretical result, several remarks are in order:

443 **Remark 1: Achieving near oracle performance**

444 A common benchmark in estimation theory is the performance of the idealistic *oracle* estimator, in  
445 which an oracle directly observes the true latent process  $\mathbf{x}_{i,l}$  and the true kernel  $d_j$  and forms the  
446 correlation estimates. In this case, the oracle would incur zero bias and variance of order  $\mathcal{O}(1/KL)$   
447 in estimating  $d_j$ , and outputs an estimate of  $\Sigma_x$  with bias and variance in the order of  $\mathcal{O}(1/KL)$ .  
448 Theorem 1 indeed states that for sufficiently large  $W$  and small  $\sigma_w$ , the bias and variance of the ML  
449 estimators are arbitrarily close to those of the oracle estimator. Recall that our variational inference  
450 framework is in fact a solution technique for the regularized ML problem. Hence, the bounds in  
451 Theorem 1 provide a benchmark for the expected performance of the proposed estimators, by  
452 quantifying the excess bias and variance over the performance of the oracle estimator.

453 **Remark 2: Effect of the observation noise and observation duration**

454 As the assumed window of stationarity  $W \rightarrow \infty$  (and hence the observation duration  $T \rightarrow \infty$ ),  
455 the loss of performance of the proposed estimators only depends on  $\sigma_w^2$ , the variance of the  
456 observation noise. As a result, at a given observation noise variance  $\sigma_w^2$ , these bounds provide a  
457 sufficient upper bound on the time duration of the observations required for attaining a desired  
458 level of estimation accuracy. It is noteworthy that  $\sigma_w^2$  is typically small in practice, as it pertains to  
459 the effective observation noise and is significantly diminished by pixel averaging of the fluorescence  
460 traces following cell segmentation.

461 **Remark 3: Effect of the number of trials**

462 Finally, note that the bounds in Theorem 1 have terms that also drop as the number of trials  $L$   
463 grows. These terms in fact pertain to the performance of the oracle estimator. As the number of  
464 trials grows ( $L \rightarrow \infty$ ), the oracle estimates become arbitrarily close to the true parameters  $\Sigma_x$  and  
465  $\mathbf{d}_j$ . Thus, our theoretical performance bounds also provide a sufficient upper bound on the number  
466 of trials  $L$  required for the oracle estimator to attain a desired level of estimation accuracy.

## 467 Discussion

468 We developed a novel approach for the joint estimation of signal and noise correlations of neuronal  
469 activities directly from two-photon calcium imaging observations and tested our method with  
470 experimental data. Existing widely used methods either take the fluorescence traces as surrogates  
471 of spiking activity, or first recover the unobserved spikes using deconvolution techniques, both  
472 followed by computing Pearson correlations or connectivity matrices. As such, they typically result in  
473 estimates that are highly biased and are heavily dependent on the choice of the spike deconvolution  
474 technique. We addressed these issues by using data with multiple repeated trials and explicitly  
475 relating the signal and noise covariances to the observed two-photon data via a multi-tier Bayesian  
476 model that accounts for the observation process and non-linearities involved in spiking activity. We  
477 developed an efficient estimation framework by integrating techniques from variational inference  
478 and state-space estimation. We established performance bounds on the bias and variance of the  
479 proposed estimators, which revealed favorable scaling with respect to the observation noise and  
480 trial length.

481 We demonstrated the utility of our proposed estimation framework on both simulated and  
482 experimentally-recorded data from the mouse auditory cortex. Our analysis showed that, unlike  
483 the aforementioned methods, our estimates provide noise correlation structures that are highly

484 invariant across spontaneous and stimulus-driven conditions, while producing signal correlation  
485 structures that are largely distinct from those given by the noise correlation. These results provide  
486 evidence for the involvement of distinct functional neuronal network structures in encoding the  
487 stimulus-dependent and stimulus-independent information.

488 Our analysis of the relationship between the signal and noise correlations in layers 2/3 and 4 in  
489 mouse A1 indicates a smaller correlation between signal and noise correlations than previously  
490 reported (*Winkowski and Kanold, 2013*). Thus, our proposed method suggests that the signal and  
491 noise correlations reflect distinct circuit mechanisms of sound processing in layers 2/3 vs 4. The  
492 spatial distribution of signal correlations obtained by our method was consistent with previous  
493 work showing significant negative trends with distance (*Winkowski and Kanold, 2013*). However,  
494 in addition, our proposed method revealed a significant negative trend of noise correlations with  
495 distance in layer 2/3, but not in layer 4, in contrast to the outcome of Pearson correlation analysis.  
496 The lack of a negative trend in layer 4 could be attributed to the sparse nature of the noise  
497 correlation spread in layer 4, as revealed by our analysis of two-dimensional spatial spreads. The  
498 latter analysis indeed revealed that the noise correlations in layer 2/3 are more widespread than  
499 those in layer 4, consistent with existing work based on whole-cell patch recordings (*Meng et al.,*  
500 *2017a,b*). In addition, the two-dimensional spatial spreads of signal and noise correlations obtained  
501 by our method are more distinct than those obtained by Pearson correlations. The spatial spreads  
502 also allude to directionality of the functional connectivity patterns, with a notable rostrocaudal  
503 preference in layer 4.

504 It is noteworthy that the proposed method can scale up favorably to larger populations of  
505 neurons, thanks to the underlying low-complexity variational updates in the inference procedure.  
506 Due to its minimal dependence on training data, our estimation framework is also applicable to  
507 single-session analysis of two-photon data with limited number of trials and duration. Another  
508 useful byproduct of the proposed framework is gaining access to approximate posterior densities  
509 in closed-form, which allows further statistical analyses such as construction of confidence intervals.  
510 Our proposed methodology can thus be used as a robust and scalable alternative to existing  
511 approaches for extracting neuronal correlations from two-photon calcium imaging data.

512 A potential limitation of our proposed model is the assumption that there is at most one spiking  
513 event per time frame for each neuron, in light of the fact that typical two-photon imaging frame  
514 durations are in the range of 30–100 ms. Average spike rates of excitatory neurons in mouse A1  
515 layers 2/3 and 4 are of the order of < 10 Hz (*Forli et al., 2018*) and thus our assumption is reasonable  
516 for the current study, although it might not be optimal during bursting activity. Even though this  
517 assumption can be made more precise by adopting a Poisson model, that would render closed-  
518 form variational density updates intractable. Furthermore, in the regime of extremely low spiking  
519 rate and high observation noise, the proposed forward model may fail to capture the underlying  
520 correlations faithfully, and the performance is expected to degrade to those of existing methods  
521 based on Pearson correlations. Nevertheless, our method addresses key limitations of conventional  
522 signal and noise correlation estimators that persist in high spiking rate and high SNR conditions.

523 Our proposed estimation framework can be used as groundwork for incorporating other notions  
524 of correlation such as the connected correlation function (*Martin et al., 2020*), and to account for  
525 non-Gaussian and higher-order structures arising from spatiotemporal interactions (*Kadirvelu*  
526 *et al., 2017; Yu et al., 2011*). Other possible extensions of this work include leveraging variational in-  
527 ference beyond the mean-field regime *Wang and Blei (2013)*, extension to time-varying correlations  
528 that underlie rapid task-dependent dynamics, and extension to non-linear models such as those  
529 parameterized by neural networks (*Aitchison et al., 2017*). In the spirit of easing reproducibility, a  
530 MATLAB implementation of our proposed method as well as the data used in this work are made  
531 publicly available (*Rupasinghe, 2020; Rupasinghe et al., 2021*).



## 532 Methods and Materials

### 533 Proposed forward model

534 Suppose we observe fluorescence traces of  $N$  neurons, for a total duration of  $T$  discrete-time frames,  
535 corresponding to  $L$  independent trials of repeated stimulus. Let  $\mathbf{y}_{t,l} := [y_{t,l}^{(1)}, y_{t,l}^{(2)}, \dots, y_{t,l}^{(N)}]^\top$ ,  $\mathbf{z}_{t,l} :=$   
536  $[z_{t,l}^{(1)}, z_{t,l}^{(2)}, \dots, z_{t,l}^{(N)}]^\top$ , and  $\mathbf{n}_{t,l} := [n_{t,l}^{(1)}, n_{t,l}^{(2)}, \dots, n_{t,l}^{(N)}]^\top$  be the vectors of noisy observations, intracellular  
537 calcium concentrations, and ensemble spiking activities, respectively, at trial  $l$  and frame  $t$ . We  
538 capture the dynamics of  $\mathbf{y}_{t,l}$  by the following state-space model:

$$\mathbf{y}_{t,l} = \mathbf{A} \mathbf{z}_{t,l} + \mathbf{w}_{t,l}, \quad \mathbf{z}_{t,l} = \alpha \mathbf{z}_{t-1,l} + \mathbf{n}_{t,l},$$

539 where  $\mathbf{A} \in \mathbb{R}^{N \times N}$  represents the scaling of the observations,  $\mathbf{w}_{t,l}$  is zero-mean i.i.d. Gaussian noise  
540 with covariance  $\Sigma_w$ , and  $0 \leq \alpha < 1$  is the state transition parameter capturing the calcium dynamics  
541 through a first order model. Note that this state-space is non-Gaussian due to the binary nature of  
542 the spiking activity, i.e.,  $n_{t,l}^{(j)} \in \{0, 1\}$ . We model the spiking data as a point process or Generalized  
543 Linear Model with Bernoulli statistics (*Eden et al., 2004; Paninski, 2004; Smith and Brown, 2003;*  
544 *Truccolo et al., 2005*):

$$n_{t,l}^{(j)} \sim \text{Bernoulli} \left( \lambda_{t,l}^{(j)} \right), \quad \lambda_{t,l}^{(j)} = \phi \left( x_{t,l}^{(j)} + \mathbf{d}_j^\top \mathbf{s}_t \right)$$

545 where  $\lambda_{t,l}^{(j)}$  is the conditional intensity function (*Truccolo et al., 2005*), which we model as a non-linear  
546 function of the known external stimulus  $\mathbf{s}_t$  and the other latent intrinsic and extrinsic trial-dependent  
547 covariates,  $\mathbf{x}_{t,l} := [x_{t,l}^{(1)}, x_{t,l}^{(2)}, \dots, x_{t,l}^{(N)}]^\top$ . While we assume the stimulus  $\mathbf{s}_t \in \mathbb{R}^M$  to be common to all  
548 neurons, we model the distinct effect of this stimulus on the  $j^{\text{th}}$  neuron via an unknown kernel  
549  $\mathbf{d}_j \in \mathbb{R}^M$ , akin to the receptive field.

550 The non-linear mapping of our choice is the logistic link, which is also the canonical link for a  
551 Bernoulli process in the point process and Generalized Linear Model frameworks (*Truccolo et al.,*  
552 *2005*). Thus, we assume:

$$\phi \left( x_{t,l}^{(j)} + \mathbf{d}_j^\top \mathbf{s}_t \right) = \frac{\exp \left( x_{t,l}^{(j)} + \mathbf{d}_j^\top \mathbf{s}_t \right)}{1 + \exp \left( x_{t,l}^{(j)} + \mathbf{d}_j^\top \mathbf{s}_t \right)}.$$

553 Finally, we assume the latent trial dependent covariates to be a Gaussian process  $\mathbf{x}_{t,l} \sim \mathcal{N}(\boldsymbol{\mu}_x, \Sigma_x)$ ,  
554 with mean  $\boldsymbol{\mu}_x := [\mu_x^{(1)}, \mu_x^{(2)}, \dots, \mu_x^{(N)}]^\top$  and covariance  $\Sigma_x$ .

555 The probabilistic graphical model in *Figure 8* summarizes the main components of the aforemen-  
556 tioned forward model. According to this forward model, the underlying noise covariance matrix that  
557 captures trial-to-trial variability can be identified as  $\Sigma_x$ . The signal covariance matrix, representing  
558 the covariance of the neural activity arising from the repeated application of the stimulus  $\mathbf{s}_t$ , is  
559 given by  $\Sigma_s := \mathbf{D}^\top \text{cov}(\mathbf{s}_t, \mathbf{s}_t) \mathbf{D}$ , where  $\mathbf{D} := [\mathbf{d}_1, \mathbf{d}_2, \dots, \mathbf{d}_N] \in \mathbb{R}^{M \times N}$ . The signal and noise correlation  
560 matrices, denoted by  $\mathbf{S}$  and  $\mathbf{N}$ , can then be obtained by standard normalization of  $\Sigma_s$  and  $\Sigma_x$ :

$$(\mathbf{S})_{i,j} := \frac{(\Sigma_s)_{i,j}}{\sqrt{(\Sigma_s)_{i,i}(\Sigma_s)_{j,j}}}, \quad (\mathbf{N})_{i,j} := \frac{(\Sigma_x)_{i,j}}{\sqrt{(\Sigma_x)_{i,i}(\Sigma_x)_{j,j}}}, \quad \forall i, j = 1, 2, \dots, N.$$

561 The main problem is thus to estimate  $\{\Sigma_x, \mathbf{D}\}$  from the noisy and temporally blurred data  $\{\mathbf{y}_{t,l}\}_{t=1}^{T,L}$ .

### 562 Overview of the proposed estimation method

First, given a limited number of trials  $L$  from an ensemble with typically low spiking rates, we need  
to incorporate suitable prior assumptions to avoid overfitting. Thus, we impose a prior  $p_{\text{pr}}(\Sigma_x)$  on  
the noise covariance, to compensate sparsity of data. A natural estimation method to estimate  
 $\{\Sigma_x, \mathbf{D}\}$  in a Bayesian framework is to maximize the observed data likelihood  $p(\{\mathbf{y}_{t,l}\}_{t=1}^{T,L} | \Sigma_x, \mathbf{D})$ , i.e.,  
maximum likelihood (ML). Thus, we consider the joint likelihood of the observed data and latent

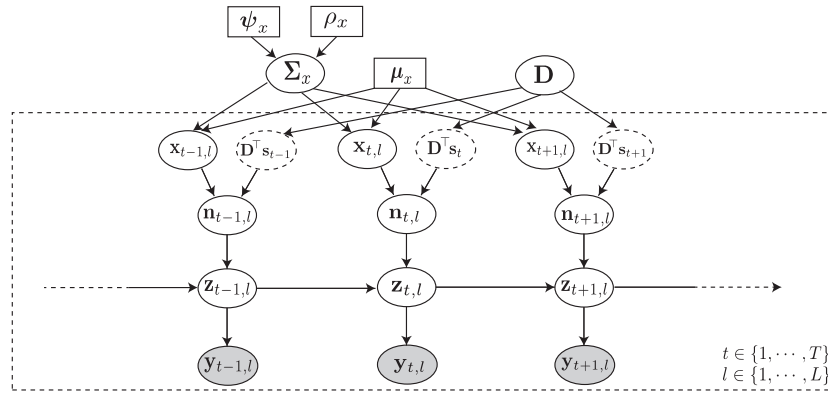

**Figure 8.** Probabilistic graphical model of the proposed forward model. The fluorescence observations at the  $t^{\text{th}}$  time frame and  $l^{\text{th}}$  trial:  $y_{t,l}$ , are noisy surrogates of the intracellular calcium concentrations:  $z_{t,l}$ . The calcium concentration at time  $t$  is a function of the spiking activity  $\mathbf{n}_{t,l}$ , and the calcium activity at the previous time point  $z_{t-1,l}$ . The spiking activity is driven by two independent mechanisms: latent trial-dependent covariates  $\mathbf{x}_{t,l}$ , and contributions from the known external stimulus  $\mathbf{s}_t$ , which we model by  $\mathbf{D}^T \mathbf{s}_t$  (in which the receptive field  $\mathbf{D}$  is unknown). Then, we model  $\mathbf{x}_{t,l}$  as a Gaussian process with constant mean  $\mu_x$ , and unknown covariance  $\Sigma_x$ . Finally, we assume the covariance  $\Sigma_x$  to have an inverse Wishart prior distribution with hyper-parameters  $\psi_x$  and  $\rho_x$ . Based on this forward model, the inverse problem amounts to recovering the signal and noise correlations by directly estimating  $\Sigma_x$  and  $\mathbf{D}$  (top layer) from the fluorescence observations  $\{y_{t,l}\}_{t=1,l=1}^{T,L}$  (bottom layer).

processes to perform Maximum a Posteriori (MAP) estimation:

$$\begin{aligned}
 & p(\mathbf{y}, \mathbf{z}, \mathbf{x}, \Sigma_x | \mathbf{D}) \\
 &= p_{\text{pr}}(\Sigma_x) \prod_{t,l=1}^{T,L} \frac{1}{\sqrt{(2\pi)^N |\Sigma_w|}} \exp\left(-\frac{1}{2}(\mathbf{y}_{t,l} - \mathbf{A}\mathbf{z}_{t,l})^T \Sigma_w^{-1} (\mathbf{y}_{t,l} - \mathbf{A}\mathbf{z}_{t,l})\right) \prod_{t,l=1}^{T,L,N} \frac{\exp\left(x_{t,l}^{(j)} + \mathbf{d}_j^T \mathbf{s}_t\right)^{z_{t,l}^{(j)} - a_{t,l}^{(j)}}}{1 + \exp\left(x_{t,l}^{(j)} + \mathbf{d}_j^T \mathbf{s}_t\right)} \prod_{t,l=1}^{T,L} \frac{1}{\sqrt{(2\pi)^N |\Sigma_x|}} \exp\left((\mathbf{x}_{t,l} - \mu_x)^T \Sigma_x^{-1} (\mathbf{x}_{t,l} - \mu_x)\right)
 \end{aligned} \tag{4}$$

563 Inspecting this MAP problem soon reveals that estimating  $\Sigma_x$  and  $\mathbf{D}$  is a challenging task: 1)  
 564 standard approaches such as Expectation-Maximization (EM) (*Shumway and Stoffer, 1982*) are  
 565 intractable due to the complexity of the model, arising from the hierarchy of latent processes and  
 566 the non-linearities involved in their mappings, and 2) the temporal coupling of the likelihood in the  
 567 calcium concentrations makes any potential direct solver scale poorly with  $T$ .

568 Thus, we propose an alternative solution based on Variational Inference (VI) (*Beal, 2003; Blei*  
 569 *et al., 2017; Jordan et al., 1999*). VI is a method widely used in Bayesian statistics to approximate  
 570 unwieldy posterior densities using optimization techniques, as a low-complexity alternative strategy  
 571 to Markov Chain Monte Carlo sampling (*Hastings, 1970*) or empirical Bayes techniques such as EM.  
 572 To this end, we treat  $\{\mathbf{x}_{t,l}\}_{t,l=1}^{T,L}$  and  $\Sigma_x$  as latent variables and  $\{\mathbf{z}_{t,l}\}_{t,l=1}^{T,L}$  and  $\mathbf{D}$  as unknown parameters to  
 573 be estimated. We introduce a framework to update the latent variables and parameters sequentially,  
 574 with straightforward update rules. We will describe the main ingredients of the proposed framework  
 575 in the following subsections. Hereafter, we use the shorthand notations  $\mathbf{y} := \{y_{t,l}\}_{t,l=1}^{T,L}$ ,  $\mathbf{z} := \{z_{t,l}\}_{t,l=1}^{T,L}$ ,  
 576 and  $\mathbf{x} := \{x_{t,l}\}_{t,l=1}^{T,L}$ .

### 577 Preliminary assumptions

578 For the sake of simplicity, we assume that the constants  $\alpha$ ,  $\mathbf{A}$ ,  $\Sigma_w$  and  $\mu_x$  are either known or can be  
 579 consistently estimated from pilot trials. For example, we assume  $\mathbf{A}$  to be diagonal and estimate  
 580 the diagonal elements based on the magnitudes of spiking events. Further, we estimate  $\mu_x$  from  
 581 the average firing rate and  $\Sigma_w$  using the background fluorescence in the absence of spiking events.  
 582 Next, we take  $p_{\text{pr}}(\Sigma_x)$  to be an Inverse Wishart density:

$$\Sigma_x \sim \text{InvWish}_N(\psi_x, \rho_x),$$

583 which turns out to be the conjugate prior in our model. Thus,  $\boldsymbol{\psi}_x$  and  $\rho_x$  will be the hyper-parameters  
 584 of our model. It is noteworthy that although we fix  $\alpha$ , it can be updated similar to the other two  
 585 hyper-parameters for better accuracy. The details of the procedure followed for hyper-parameter  
 586 tuning are given in the subsection Hyper-parameter tuning.

### 587 Decoupling via Pólya-Gamma augmentation

588 Direct application of VI to problems containing both discrete and continuous random variables  
 589 results in intractable densities. Specifically, finding a variational distribution for  $\mathbf{x}_{t,l}$  in our model  
 590 with a standard distribution is not straightforward, due to the complicated posterior arising from  
 591 co-dependent Bernoulli and Gaussian random variables. In order to overcome this difficulty, we  
 592 employ Pólya-Gamma (PG) latent variables ([Pillow and Scott, 2012](#); [Polson et al., 2013](#); [Linderman](#)  
 593 [et al., 2016](#)). We observe from [Equation 4](#) that the posterior density,  $p(\mathbf{x}|\mathbf{z}, \mathbf{D}, \boldsymbol{\Sigma}_x)$  is conditionally  
 594 independent in  $t, l$  with:

$$p(\mathbf{x}_{t,l}|\mathbf{z}, \mathbf{D}, \boldsymbol{\Sigma}_x) \propto p(\mathbf{x}_{t,l}|\boldsymbol{\Sigma}_x) \prod_{j=1}^N \frac{\left( \exp\left(x_{t,l}^{(j)} + \mathbf{d}_j^\top \mathbf{s}_t\right) \right)^{z_{t,l}^{(j)} - \alpha z_{t-1,l}^{(j)}}}{1 + \exp\left(x_{t,l}^{(j)} + \mathbf{d}_j^\top \mathbf{s}_t\right)}.$$

Thus, upon careful inspection we see that this density has the desired form for the PG augmentation  
 scheme ([Polson et al., 2013](#)). Accordingly, we introduce a set of auxiliary PG-distributed i.i.d. latent  
 random variables  $\boldsymbol{\omega}_{t,l} := [\omega_{t,l}^{(1)}, \omega_{t,l}^{(2)}, \dots, \omega_{t,l}^{(N)}]^\top$ ,  $\omega_{t,l}^{(j)} \sim \text{PG}(1, 0)$  for  $1 \leq j \leq N$ ,  $1 \leq t \leq T$  and  $1 \leq l \leq L$ , to  
 derive the complete data log-likelihood:

$$\begin{aligned} & \log p(\mathbf{y}, \mathbf{z}, \mathbf{x}, \boldsymbol{\omega}, \boldsymbol{\Sigma}_x | \mathbf{D}) \\ &= -\frac{TL}{2} \log |\boldsymbol{\Sigma}_x| + \log p_{\text{pr}}(\boldsymbol{\Sigma}_x) + \sum_{t,l=1}^{T,L} \left\{ -\frac{1}{2} (\mathbf{y}_{t,l} - \mathbf{A}\mathbf{z}_{t,l})^\top \boldsymbol{\Sigma}_w^{-1} (\mathbf{y}_{t,l} - \mathbf{A}\mathbf{z}_{t,l}) - \frac{1}{2} (\mathbf{x}_{t,l} - \boldsymbol{\mu}_x)^\top \boldsymbol{\Sigma}_x^{-1} (\mathbf{x}_{t,l} - \boldsymbol{\mu}_x) \right. \\ & \quad \left. + \sum_{j=1}^N \left\{ \left( z_{t,l}^{(j)} - \alpha z_{t-1,l}^{(j)} - \frac{1}{2} \right) \left( x_{t,l}^{(j)} + \mathbf{d}_j^\top \mathbf{s}_t \right) - \frac{1}{2} \omega_{t,l}^{(j)} \left( x_{t,l}^{(j)} + \mathbf{d}_j^\top \mathbf{s}_t \right)^2 + \log p_{\text{PG}(1,0)}\left(\omega_{t,l}^{(j)}\right) \right\} \right\} + C, \end{aligned} \quad (5)$$

595 where  $\boldsymbol{\omega} := \{\boldsymbol{\omega}_{t,l}\}_{t,l=1}^{T,L}$  and  $C$  accounts for terms not depending on  $\mathbf{y}, \mathbf{z}, \mathbf{x}, \boldsymbol{\omega}, \boldsymbol{\Sigma}_x$  and  $\mathbf{D}$ . The complete  
 596 data log-likelihood is notably *quadratic* in  $\mathbf{z}_{t,l}$ , which as we show later admits efficient estimation  
 597 procedures with favorable scaling in  $T$ .

### 598 Deriving the optimal variational densities

599 In this section, we will outline the procedure of applying VI to the latent variables  $\mathbf{x} = \{\mathbf{x}_{t,l}\}_{t,l=1}^{T,L}$ ,  $\boldsymbol{\omega} =$   
 600  $\{\boldsymbol{\omega}_{t,l}\}_{t,l=1}^{T,L}$  and  $\boldsymbol{\Sigma}_x$ , assuming that the parameter estimates  $\hat{\mathbf{z}}$  and  $\hat{\mathbf{D}}$  of the previous iteration are  
 601 available. The methods that we propose to update the parameters  $\hat{\mathbf{z}}$  and  $\hat{\mathbf{D}}$  subsequently, will be  
 602 discussed in the next section.

603 The objective of variational inference is to posit a family of approximate densities  $\mathcal{Q}$  over the  
 604 latent variables, and to find the member of that family that minimizes the Kullback-Leibler (KL)  
 605 divergence to the exact posterior:

$$q^*(\mathbf{x}, \boldsymbol{\omega}, \boldsymbol{\Sigma}_x | \hat{\mathbf{z}}, \hat{\mathbf{D}}) = \operatorname{argmin}_{q \in \mathcal{Q}} \text{KL} \left( q(\mathbf{x}, \boldsymbol{\omega}, \boldsymbol{\Sigma}_x | \hat{\mathbf{z}}, \hat{\mathbf{D}}) \parallel p(\mathbf{x}, \boldsymbol{\omega}, \boldsymbol{\Sigma}_x | \mathbf{y}, \hat{\mathbf{z}}, \hat{\mathbf{D}}) \right).$$

606 However, evaluating the KL divergence is intractable, and it has been shown ([Blei et al., 2017](#)) that  
 607 an equivalent result to this minimization can be obtained by maximizing the alternative objective  
 608 function, called the evidence lower bound (ELBO):

$$\text{ELBO}(q) = \mathbb{E}[\log p(\mathbf{x}, \boldsymbol{\omega}, \boldsymbol{\Sigma}_x, \mathbf{y} | \hat{\mathbf{z}}, \hat{\mathbf{D}})] - \mathbb{E}[\log q(\mathbf{x}, \boldsymbol{\omega}, \boldsymbol{\Sigma}_x | \hat{\mathbf{z}}, \hat{\mathbf{D}})].$$

609 Further, we assume  $\mathcal{Q}$  to be a mean-field variational family ([Blei et al., 2017](#)), resulting in the  
 610 overall variational density of the form:

$$q(\mathbf{x}, \boldsymbol{\omega}, \boldsymbol{\Sigma}_x) = q(\boldsymbol{\Sigma}_x) \prod_{t,l=1}^{T,L} \left( q(\mathbf{x}_{t,l}) \prod_{j=1}^N q(\omega_{t,l}^{(j)}) \right). \quad (6)$$

611 Under the mean field assumptions, the maximization of the ELBO can be derived using the opti-  
 612 mization algorithm ‘Coordinate Ascent Variational Inference’ (CAVI) (*Bishop, 2006; Blei et al., 2017*).  
 613 Accordingly, we see that the optimal variational densities in **Equation 6** take the forms:

$$\begin{aligned}\log q^*(\mathbf{x}_{t,l}) &\propto \mathbb{E}_{q^*(\Sigma_x)q^*(\omega_{t,l})} \left[ \log p(\mathbf{x}_{t,l} | \omega_{t,l}, \Sigma_x, \mathbf{y}, \hat{\mathbf{z}}, \hat{\mathbf{D}}) \right] \\ \log q^*(\omega_{t,l}^{(j)}) &\propto \mathbb{E}_{q^*(\mathbf{x}_{t,l})} \left[ \log p(\omega_{t,l}^{(j)} | \mathbf{x}_{t,l}, \Sigma_x, \mathbf{y}, \hat{\mathbf{z}}, \hat{\mathbf{D}}) \right] \\ \log q^*(\Sigma_x) &\propto \mathbb{E}_{q^*(\mathbf{x})} \left[ \log p(\Sigma_x | \mathbf{x}, \mathbf{y}, \hat{\mathbf{z}}, \hat{\mathbf{D}}) \right]\end{aligned}$$

Upon evaluation of these expectations, we derive the optimal variational distributions as:

$$q^*(\mathbf{x}_{t,l}) \sim \mathcal{N}(\mathbf{m}_{\mathbf{x}_{t,l}}, \mathbf{Q}_{\mathbf{x}_{t,l}}), \quad q^*(\omega_{t,l}^{(j)}) \sim \text{PG}(1, c_{t,l}^{(j)}), \quad q^*(\Sigma_x) \sim \text{InvWish}_N(\mathbf{P}_x, \gamma_x).$$

whose parameters  $\mathbf{m}_{\mathbf{x}_{t,l}} := [m_{\mathbf{x}_{t,l}}^{(1)}, m_{\mathbf{x}_{t,l}}^{(2)}, \dots, m_{\mathbf{x}_{t,l}}^{(N)}]^\top$ ,  $\mathbf{Q}_{\mathbf{x}_{t,l}}$ ,  $c_{t,l}^{(j)}$ ,  $\mathbf{P}_x$  and  $\gamma_x$  can be updated given parameter estimates  $\hat{\mathbf{D}}$  and  $\hat{\mathbf{z}}$ :

$$\begin{aligned}\mathbf{Q}_{\mathbf{x}_{t,l}} &= (\tilde{\mathbf{Q}}_{t,l} + \gamma_x \mathbf{P}_x^{-1})^{-1}, \quad \mathbf{m}_{\mathbf{x}_{t,l}} = \mathbf{Q}_{\mathbf{x}_{t,l}} \left( \hat{\mathbf{z}}_{t,l} - \alpha \hat{\mathbf{z}}_{t-1,l} - \frac{1}{2} \mathbf{1} - \tilde{\mathbf{Q}}_{t,l} \hat{\mathbf{D}}^\top \mathbf{s}_t + \gamma_x \mathbf{P}_x^{-1} \boldsymbol{\mu}_x \right), \\ \mathbf{P}_x &:= \boldsymbol{\Psi}_x + \sum_{t,l=1}^{T,L} \left\{ \mathbf{Q}_{\mathbf{x}_{t,l}} + \mathbf{m}_{\mathbf{x}_{t,l}} \mathbf{m}_{\mathbf{x}_{t,l}}^\top - \boldsymbol{\mu}_x \mathbf{m}_{\mathbf{x}_{t,l}}^\top - \mathbf{m}_{\mathbf{x}_{t,l}} \boldsymbol{\mu}_x^\top + \boldsymbol{\mu}_x \boldsymbol{\mu}_x^\top \right\}, \quad c_{t,l}^{(j)} = \sqrt{\left( \mathbf{Q}_{\mathbf{x}_{t,l}} \right)_{j,j} + \left( m_{\mathbf{x}_{t,l}}^{(j)} + \hat{\mathbf{d}}_j^\top \mathbf{s}_t \right)^2},\end{aligned}$$

614 and  $\gamma_x := \rho_x + TL$ , with  $\tilde{\mathbf{Q}}_{t,l} \in \mathbb{R}^{N \times N}$  denoting a diagonal matrix with entries  $(\tilde{\mathbf{Q}}_{t,l})_{j,j} := \frac{1}{2c_{t,l}^{(j)}} \tanh\left(\frac{c_{t,l}^{(j)}}{2}\right)$   
 615 and  $\mathbf{1} \in \mathbb{R}^N$  denoting the vector of all ones.

### 616 Low-complexity parameter updates

617 Note that even though  $\mathbf{z}$  is composed of the latent processes  $\mathbf{z}_{t,l}$ , we do not use VI for its inference,  
 618 and instead consider it as an unknown parameter. This choice is due to the temporal dependencies  
 619 arising from the underlying state-space model in **Equation 4**, which hinders a proper assignment  
 620 of variational densities under the mean field assumption. We thus seek to estimate both  $\mathbf{z}$  and  $\mathbf{D}$   
 621 using the updated variational density  $q^*(\mathbf{x}, \omega, \Sigma_x)$ .

First, note that the log-likelihood in **Equation 5** is decoupled in  $l$ , which admits independent updates to  $\{\mathbf{z}_{t,l}\}_{l=1}^T$ , for  $l = 1, \dots, L$ . As such, given an estimate  $\hat{\mathbf{D}}$ , we propose to estimate  $\{\mathbf{z}_{t,l}\}_{l=1}^T$  as:

$$\begin{aligned}\{\hat{\mathbf{z}}_{t,l}\}_{l=1}^T &= \underset{\{\mathbf{z}_{t,l}\}_{l=1}^T}{\operatorname{argmax}} \mathbb{E}_{q^*(\mathbf{x}, \omega, \Sigma_x)} \left[ \log p(\mathbf{y}, \mathbf{z}, \mathbf{x}, \omega, \Sigma_x | \hat{\mathbf{D}}) \right] \\ &= \underset{\{\mathbf{z}_{t,l}\}_{l=1}^T}{\operatorname{argmin}} \sum_{t=1}^T \left\{ \frac{1}{2} (\mathbf{y}_{t,l} - \mathbf{A} \mathbf{z}_{t,l})^\top \boldsymbol{\Sigma}_w^{-1} (\mathbf{y}_{t,l} - \mathbf{A} \mathbf{z}_{t,l}) - \sum_{j=1}^N \left( m_{\mathbf{x}_{t,l}}^{(j)} + \hat{\mathbf{d}}_j^\top \mathbf{s}_t \right) \left( z_{t,l}^{(j)} - \alpha z_{t-1,l}^{(j)} \right) \right\},\end{aligned}$$

622 under the constraints  $0 \leq z_{t,l}^{(j)} - \alpha z_{t-1,l}^{(j)} \leq 1$ , for  $t = 1, \dots, T$  and  $j = 1, \dots, N$ . These constraints are  
 623 a direct consequence of  $n_{t,l}^{(j)} = z_{t,l}^{(j)} - \alpha z_{t-1,l}^{(j)}$  being a Bernoulli random variable with  $\mathbb{E}[n_{t,l}^{(j)}] \in [0, 1]$ .  
 624 While this problem is a quadratic program and can be solved using standard techniques, it is not  
 625 readily decoupled in  $t$ , and thus standard solvers would not scale favorably in  $T$ .

626 Instead, we consider an alternative solution that admits a low-complexity recursive solution  
 627 by relaxing the constraints. To this end, we relax the constraint  $\mathbf{z}_{t,l} - \alpha \mathbf{z}_{t-1,l} \leq \mathbf{1}$  and replace the  
 628 constraint  $\mathbf{z}_{t,l} - \alpha \mathbf{z}_{t-1,l} \geq \mathbf{0}$  by penalty terms proportional to  $\left| z_{t,l}^{(j)} - \alpha z_{t-1,l}^{(j)} \right|$ . The resulting relaxed  
 629 problem is thus given by:

$$\min_{\{\mathbf{z}_{t,l}\}_{l=1}^T} \sum_{t=1}^T \left\{ \frac{1}{2} (\mathbf{y}_{t,l} - \mathbf{A} \mathbf{z}_{t,l})^\top \boldsymbol{\Sigma}_w^{-1} (\mathbf{y}_{t,l} - \mathbf{A} \mathbf{z}_{t,l}) + \sum_{j=1}^N v_{t,l}^{(j)} \left| z_{t,l}^{(j)} - \alpha z_{t-1,l}^{(j)} \right| \right\}, \quad (7)$$

630 where  $v_{t,l}^{(j)} := \beta |m_{\mathbf{x}_{t,l}}^{(j)} + \hat{\mathbf{d}}_j^\top \mathbf{s}_t|$  with  $\beta \geq 1$  being a hyper-parameter. Given that the typical spiking rates  
 631 are quite low in practice,  $m_{\mathbf{x}_{t,l}}^{(j)} + \hat{\mathbf{d}}_j^\top \mathbf{s}_t$  is expected to be a negative number. Thus, we have assumed  
 632 that  $-m_{\mathbf{x}_{t,l}}^{(j)} - \hat{\mathbf{d}}_j^\top \mathbf{s}_t = |m_{\mathbf{x}_{t,l}}^{(j)} + \hat{\mathbf{d}}_j^\top \mathbf{s}_t|$ .

The problem of **Equation 7** pertains to *compressible* state-space estimation, for which fast recursive solvers are available (*Kazempour et al., 2018*). The solver utilizes the Iteratively Reweighted Least Squares (IRLS) (*Ba et al., 2014*) framework to transform the absolute value in the second term of the cost function into a quadratic form in  $\mathbf{z}_{t,l}$ , followed by Fixed Interval Smoothing (FIS) (*Rauch et al., 1965*) to find the minimizer. At iteration  $k$ , given a current estimate  $\mathbf{z}^{[k-1]}$ , the problem reduces to a Gaussian state-space estimation of the form:

$$\mathbf{y}_{t,l} = \mathbf{A}\mathbf{z}_{t,l} + \mathbf{w}_{t,l}, \quad \mathbf{z}_{t,l} = \alpha\mathbf{z}_{t-1,l} + \mathbf{v}_{t,l}, \quad (8)$$

633 with  $\mathbf{w}_{t,l} \sim \mathcal{N}(0, \boldsymbol{\Sigma}_w)$  and  $\mathbf{v}_{t,l} \sim \mathcal{N}(0, \boldsymbol{\Sigma}_{v_{t,l}}^{[k]})$ , where  $\boldsymbol{\Sigma}_{v_{t,l}}^{[k]} \in \mathbb{R}^{N \times N}$  is a diagonal matrix with  $(\boldsymbol{\Sigma}_{v_{t,l}}^{[k]})_{j,j} :=$   
 634  $\sqrt{\frac{(\hat{z}_{t,l}^{[k-1]} - \alpha\hat{z}_{t-1,l}^{[k-1]})^2 + \varepsilon^2}{v_{t,l}^{(j)}}}$ , for some small constant  $\varepsilon > 0$ . This problem can be efficiently solved using  
 635 FIS, and the iterations proceed for a total of  $K$  times or until a standard convergence criterion is met  
 636 (*Kazempour et al., 2018*). It is noteworthy that our proposed estimator of the calcium concentration  
 637  $\mathbf{z}_{t,l}$  can be thought of as *soft* spike deconvolution, which naturally arises from our variational  
 638 framework, as opposed to the *hard* spike deconvolution step used in two-stage estimators.

Finally, given  $q^*(\mathbf{x}, \boldsymbol{\omega}, \boldsymbol{\Sigma}_x)$  and the updated  $\hat{\mathbf{z}}$ , the estimate of  $\mathbf{d}_j$  for  $j = 1, 2, \dots, N$  can be updated in closed-form by maximizing the expected complete log-likelihood  $\mathbb{E}_{q^*(\mathbf{x}, \boldsymbol{\omega}, \boldsymbol{\Sigma}_x)} [\log p(\mathbf{y}, \hat{\mathbf{z}}, \mathbf{x}, \boldsymbol{\omega}, \boldsymbol{\Sigma}_x | \mathbf{D})]$ :

$$\hat{\mathbf{d}}_j = \left( \sum_{t,l=1}^{T,L} \left( (\tilde{\boldsymbol{\Omega}}_{t,l})_{j,j} \mathbf{s}_t \mathbf{s}_t^\top \right) \right)^{-1} \left( \sum_{t,l=1}^{T,L} \left\{ \left( \hat{z}_{t,l}^{(j)} - \alpha \hat{z}_{t-1,l}^{(j)} - \frac{1}{2} \right) \mathbf{s}_t - (\tilde{\boldsymbol{\Omega}}_{t,l})_{j,j} m_{x_{t,l}}^{(j)} \mathbf{s}_t \right\} \right).$$

639 The VI procedure iterates between updating the variational densities and parameters until conver-  
 640 gence, upon which we estimate the noise and signal covariances as:

$$\hat{\boldsymbol{\Sigma}}_x := \text{mode}\{q^*(\boldsymbol{\Sigma}_x)\} = \frac{\mathbf{P}_x}{\gamma_x + N + 1}, \quad \hat{\boldsymbol{\Sigma}}_s := \hat{\mathbf{D}}^\top \mathbb{E}[\mathbf{s}_t \mathbf{s}_t^\top] \hat{\mathbf{D}}.$$

641 The overall combined iterative procedure is outlined in Algorithm 1. Furthermore, a MATLAB  
 642 implementation of this algorithm is publicly available in *Rupasinghe (2020)*.

## 643 Model parameter settings

### 644 Simulation study 1

645 In the first simulation study, we set  $\alpha = 0.98$ ,  $\beta = 8$ ,  $\mathbf{A} = 0.1\mathbf{I}$ ,  $\boldsymbol{\mu}_x = -4.5\mathbf{1}$  and  $\boldsymbol{\Sigma}_w = 2 \times 10^{-4}\mathbf{I}$  ( $\mathbf{I} \in \mathbb{R}^{8 \times 8}$   
 646 represents the identity matrix and  $\mathbf{1} \in \mathbb{R}^8$  represents the vector of all ones), so that the SNR of  
 647 simulated data was in the same range as that of experimentally-recorded data. We used a 6<sup>th</sup> order  
 648 autoregressive process with a mean of  $-1$  as the stimulus ( $s_t$ ), and considered  $M = 2$  lags of the  
 649 stimulus (i.e.,  $\mathbf{s}_t = [s_t, s_{t-1}]^\top$ ) in the subsequent analysis.

### 650 Simulation study 2

651 In the second simulation study, we set  $\alpha = 0.98$ ,  $\mathbf{A} = 0.1\mathbf{I}$ ,  $\boldsymbol{\mu}_x = -4.5\mathbf{1}$  and  $\boldsymbol{\Sigma}_w = 10^{-4}\mathbf{I}$  ( $\mathbf{I} \in \mathbb{R}^{30 \times 30}$   
 652 represents the identity matrix and  $\mathbf{1} \in \mathbb{R}^{30}$  represents the vector of all ones) when generating the  
 653 fluorescence traces  $\{\mathbf{y}_{t,l}\}_{t,l=1}^{T,L}$ , so that the SNR of the simulated data was in the same range as of  
 654 real calcium imaging observations. Furthermore, we simulated the spike trains based on a Poisson  
 655 process (*Smith and Brown, 2003*) using the discrete time re-scaling procedure (*Brown et al., 2002*;  
 656 *Smith and Brown, 2003*). Following the assumptions in *Brown et al. (2002)*, we used an exponential  
 657 link to simulate the observations:

$$n_{t,l}^{(j)} \sim \text{Poisson} \left( \lambda_{t,l}^{(j)} \right), \quad \lambda_{t,l}^{(j)} = \exp \left( x_{t,l}^{(j)} \right).$$

658 as opposed to the Bernoulli-logistic assumption in our recognition model. Then, we estimated the  
 659 noise covariance  $\hat{\boldsymbol{\Sigma}}_x$  using the Algorithm 1, with a slight modification. Since there are no external  
 660 stimuli, we set  $\mathbf{s}_t = \mathbf{0}$  and  $\mathbf{D} = \mathbf{0}$ . Accordingly, in Algorithm 1, we initialized  $\hat{\mathbf{D}} = \mathbf{0}$  and did not perform  
 661 the update on  $\hat{\mathbf{D}}$  in the subsequent iterations.

---

**Algorithm 1** Estimation of  $\Sigma_x$  and  $\mathbf{D}$  through the proposed iterative procedure

---

**Inputs:** Ensemble of fluorescence measurements  $\{\mathbf{y}_{t,l}\}_{t,l=1}^{T,L}$ , constants  $\alpha, \mathbf{A}, \Sigma_w$  and  $\mu_x$ , hyper-parameters  $\psi_x, \rho_x, \beta$  and  $\epsilon$ , tolerance at convergence  $\delta$  and the external stimulus  $s_t$

**Outputs:**  $\hat{\Sigma}_x$  and  $\hat{\mathbf{D}}$

**Initialization:** Initial choice of  $\Sigma_{v_{t,l}}, \tilde{\mathbf{Q}}_{t,l}, \hat{\Sigma}_x$  and  $\hat{\mathbf{D}}$ , residual =  $10\delta, \gamma_x = \rho_x + LT$

1: **while** residual  $\geq \delta$  **do**

**Estimate calcium concentrations using Fixed Interval Smoothing**

2: **for**  $l = 1, \dots, L$  **do**

Forward filter:

3: **for**  $t = 1, \dots, T$  **do**  
4:  $\mathbf{z}_{(t|t-1),l} = \alpha \mathbf{z}_{(t-1|t-1),l}$   
5:  $\mathbf{P}_{(t|t-1),l} = \alpha^2 \mathbf{P}_{(t-1|t-1),l} + \Sigma_{v_{t,l}}$   
6:  $\mathbf{B}_{t,l} = \mathbf{P}_{(t|t-1),l} \mathbf{A}^\top (\mathbf{A} \mathbf{P}_{(t|t-1),l} \mathbf{A}^\top + \Sigma_w)^{-1}$   
7:  $\mathbf{z}_{(t|t),l} = \mathbf{z}_{(t|t-1),l} + \mathbf{B}_{t,l} (\mathbf{y}_{t,l} - \mathbf{A} \mathbf{z}_{(t|t-1),l})$   
8:  $\mathbf{P}_{(t|t),l} = (\mathbf{I} - \mathbf{B}_{t,l} \mathbf{A}) \mathbf{P}_{(t|t-1),l}$   
9: **end for**

Backward smoother:

10: **for**  $t = T - 1, \dots, 1$  **do**  
11:  $\hat{\mathbf{z}}_{t,l} = \mathbf{z}_{(t|t),l} + \alpha \mathbf{P}_{(t|t),l} \mathbf{P}_{(t+1|t),l}^{-1} (\hat{\mathbf{z}}_{t+1,l} - \mathbf{z}_{(t+1|t),l})$   
12: **end for**  
13: **end for**

**Update variational parameters**

14: **for**  $t = 1, \dots, T$  and  $l = 1, \dots, L$  **do**  
15:  $\mathbf{Q}_{x_{t,l}} = (\tilde{\mathbf{Q}}_{t,l} + \gamma_x \mathbf{P}_{x,t}^{-1})^{-1}$   
16:  $\mathbf{m}_{x_{t,l}} = \mathbf{Q}_{x_{t,l}} \left( \hat{\mathbf{z}}_{t,l} - \alpha \hat{\mathbf{z}}_{t-1,l} - \frac{1}{2} \mathbf{1} - \tilde{\mathbf{Q}}_{t,l} \hat{\mathbf{D}}^\top \mathbf{s}_t + \gamma_x \mathbf{P}_{x,t}^{-1} \mu_x \right)$   
17:  $v_{t,l}^{(j)} := \beta |m_{x_{t,l}}^{(j)} + \hat{\mathbf{d}}_j^\top \mathbf{s}_t|$   
18: **for**  $j = 1, \dots, N$  **do**  
19:  $c_{t,l}^{(j)} = \sqrt{\left( \mathbf{Q}_{x_{t,l}} \right)_{j,j} + \left( m_{x_{t,l}}^{(j)} + \hat{\mathbf{d}}_j^\top \mathbf{s}_t \right)^2}$   
20:  $\left( \tilde{\mathbf{Q}}_{t,l} \right)_{j,j} := \frac{1}{2c_{t,l}^{(j)}} \tanh \left( \frac{c_{t,l}^{(j)}}{2} \right)$   
21: **end for**  
22: **end for**  
23:  $\mathbf{P}_x := \psi_x + \sum_{t,l=1}^{T,L} \{ \mathbf{Q}_{x_{t,l}} + \mathbf{m}_{x_{t,l}} \mathbf{m}_{x_{t,l}}^\top - \mu_x \mathbf{m}_{x_{t,l}}^\top - \mathbf{m}_{x_{t,l}} \mu_x^\top + \mu_x \mu_x^\top \}$

**Update IRLS covariance approximation**

24: **for**  $l = 1, \dots, L, t = 1, \dots, T$  and  $j = 1, \dots, N$  **do**  
25:  $\left( \Sigma_{v_{t,l}} \right)_{j,j} := \sqrt{\left( \tilde{c}_{t,l}^{(j)} - \alpha \tilde{c}_{t-1,l}^{(j)} \right)^2 + \epsilon^2} / v_{t,l}^{(j)}$   
26: **end for**

**Update outputs and the convergence criterion**

27: **for**  $j = 1, \dots, N$  **do**  
28:  $\hat{\mathbf{d}}_j = \left( \sum_{t,l=1}^{T,L} \left( \tilde{\mathbf{Q}}_{t,l} \right)_{j,j} \mathbf{s}_t \mathbf{s}_t^\top \right)^{-1} \left( \sum_{t,l=1}^{T,L} \left\{ \left( \tilde{c}_{t,l}^{(j)} - \alpha \tilde{c}_{t-1,l}^{(j)} - \frac{1}{2} \right) \mathbf{s}_t - \left( \tilde{\mathbf{Q}}_{t,l} \right)_{j,j} m_{x_{t,l}}^{(j)} \mathbf{s}_t \right\} \right)$   
29: **end for**  
30:  $(\hat{\mathbf{D}})_{\text{prev}} = \hat{\mathbf{D}}, \hat{\mathbf{D}} = [\hat{\mathbf{d}}_1, \hat{\mathbf{d}}_2, \dots, \hat{\mathbf{d}}_N]$   
31:  $(\hat{\Sigma}_x)_{\text{prev}} = \hat{\Sigma}_x, \hat{\Sigma}_x = \frac{\mathbf{P}_x}{\gamma_x + N + 1}$   
32: residual =  $\|(\hat{\Sigma}_x)_{\text{prev}} - \hat{\Sigma}_x\|_2 / \|(\hat{\Sigma}_x)_{\text{prev}}\|_2 + \|(\hat{\mathbf{D}})_{\text{prev}} - \hat{\mathbf{D}}\|_2 / \|(\hat{\mathbf{D}})_{\text{prev}}\|_2$

33: **end while**

34: Return  $\hat{\Sigma}_x$  and  $\hat{\mathbf{D}}$

---

## 662 Real data study 1

663 The dataset consisted of recordings from 371 excitatory neurons, from which we selected  $N = 16$   
664 neurons with high level of activity for the analysis. Each trial consisted of  $T = 3600$  time frames (the  
665 sampling frequency was 30 Hz, and each trial had a duration of 120 seconds), with the presentation  
666 of a random sequence of four tones. The spiking events were very sparse and infrequent, and  
667 hence this dataset fits our model with at most one spiking event in a time frame.

668 We encoded the stimulus in this experiment based on the tone onsets of the four tones. Suppose  
669 that the tone onset of the  $p^{\text{th}}$  tone ( $p = 1, \dots, P$ , where  $P = 4$ ) is given by the binary sequence  $\mathbf{f}_t^{(p)} \in \mathbb{R}^T$ .  
670 We assumed that the response at each time  $t$  depends only on the  $R$  most recent time lags of  
671 the stimulus. For each time  $t$ , we formulated the effective stimulus corresponding to the tone  
672  $p$ :  $\mathbf{s}_t^{(p)} \in \mathbb{R}^R$ , using the  $R$  recent lags of the tone onset sequence  $\mathbf{f}_t^{(p)}$  starting at  $t$ . Likewise, we  
673 encoded all  $P$  tones, and then formulated the overall effective stimulus at the  $t^{\text{th}}$  time frame,  
674  $\mathbf{s}_t := [\mathbf{s}_t^{(1)\top}, \dots, \mathbf{s}_t^{(P)\top}]_{RP \times 1}^\top$ . Note that the weight vector  $\mathbf{d}_j$  would be  $M = R \times P$  dimensional under this  
675 setting. Further, based on the duration of the tones and silent periods, we considered  $R = 25$  time  
676 lags in this analysis.

677 We set  $\alpha = 0.95$  and  $\mathbf{A} = \mathbf{I}$  ( $\mathbf{I} \in \mathbb{R}^{16 \times 16}$  represents the identity matrix), after considering the  
678 magnitude of the spiking events in observations. Further, we estimated  $\boldsymbol{\mu}_x$  by a linear function  
679 of average fluorescence activity. Finally, we assumed that the observation noise covariance  $\boldsymbol{\Sigma}_w$  is  
680 diagonal, and estimated the diagonal elements using the background fluorescence in the absence  
681 of spiking events.

## 682 Real data study 2

683 Each trial consisted of  $T = 765$  frames (25.5 seconds) at a sampling frequency of 30 Hz. The layer  
684 2/3 auditory neurons, are known to exhibit spiking rates  $< 5$  Hz (e.g., Fig. 2-F in *Petrus et al. (2014)*),  
685 which makes the Bernoulli spiking assumption plausible for the dataset considered. Further, the  
686 auditory neurons studied here had notably low response rates (in both time and space), with only  
687  $\sim 10$  neurons exhibiting meaningful response. Thus, we selected  $N = 10$  neurons with the highest  
688 level of activity and  $L = 10$  trials for the analysis, and chose  $M = 40$  lags of the stimulus in the model  
689 for the stimulus-driven condition.

690 We set  $\alpha = 0.95$  and  $\mathbf{A} = 0.75\mathbf{I}$  ( $\mathbf{I} \in \mathbb{R}^{10 \times 10}$  represents the identity matrix), considering the  
691 magnitude of the spiking events in fluorescence observations. We used the same methods as in  
692 the first real data study to determine the optimal settings of  $\boldsymbol{\mu}_x$  and  $\boldsymbol{\Sigma}_w$ .

## 693 Real data study 3

694 Each experiment consisted of  $L = 5$  trials of  $P = 9$  different tone frequencies repeated at 4 different  
695 amplitude levels, resulting in each concatenated trial being  $\sim 180$  second long (see *Bowen et al.*  
696 *(2020)* for more details). We used the same procedure as in the first real data study to encode this  
697 stimulus, setting the number of time lags to be  $R = 25$ . For each layer, we analyzed fluorescence  
698 observations from six experiments. In each experiment, we selected the most responsive  $N \sim 20$   
699 neurons for the subsequent analysis.

700 We set  $\alpha = 0.95$ ,  $\mathbf{A} = \mathbf{I}$  and used the same methods as in the previous two studies to determine  
701 the optimal settings of  $\boldsymbol{\mu}_x$  and  $\boldsymbol{\Sigma}_w$  in each experiment.

## 702 Performance evaluation

### 703 Simulation studies

704 Since the ground truth is known in simulations, we directly compared the performance of each signal  
705 and noise correlation estimate with the ground truth signal and noise correlations, respectively.  
706 Suppose the ground truth correlations are given by the matrix  $\mathbf{X}$  and the estimated correlations are  
707 given by the matrix  $\hat{\mathbf{X}}$ . To quantify the similarity between  $\mathbf{X}$  and  $\hat{\mathbf{X}}$ , we defined the following two  
708 metrics:

709 *Normalized Mean Squared Error (NMSE)*: The NMSE computes the mean squared error of  $\hat{\mathbf{X}}$  with  
710 respect to  $\mathbf{X}$  using the Frobenius Norm:

$$\text{NMSE} := \frac{\|\mathbf{X} - \hat{\mathbf{X}}\|_F^2}{\|\mathbf{X}\|_F^2}.$$

711 *Ratio between out-of-network power and in-network power (leakage)*: First, we identified the in-  
712 network and out-of-network components from the ground truth correlation matrix  $\mathbf{X}$ . Suppose  
713 that if the true correlation between the  $i^{\text{th}}$  neuron and the  $j^{\text{th}}$  neuron is non-zero, then  $|(\mathbf{X})_{i,j}| > \delta_x$ ,  
714 for some  $\delta_x > 0$ . Thus, we formed a matrix  $\mathbf{X}^{\text{in}}$  that masks the in-network components, by setting  
715  $(\mathbf{X}^{\text{in}})_{i,j} = 1$  if  $|(\mathbf{X})_{i,j}| > \delta_x$  and  $(\mathbf{X}^{\text{in}})_{i,j} = 0$  if  $|(\mathbf{X})_{i,j}| \leq \delta_x$ . Likewise, we also formed a matrix  $\mathbf{X}^{\text{out}}$  that  
716 masks the out-of-network components, by setting  $(\mathbf{X}^{\text{out}})_{i,j} = 1$  if  $|(\mathbf{X})_{i,j}| \leq \delta_x$  and  $(\mathbf{X}^{\text{out}})_{i,j} = 0$  if  
717  $|(\mathbf{X})_{i,j}| > \delta_x$ . Then, using these two matrices we quantified the leakage effect of  $\hat{\mathbf{X}}$  comparative to  $\mathbf{X}$   
718 by:

$$\text{leakage} := \frac{\|\hat{\mathbf{X}} \cdot \mathbf{X}^{\text{out}}\|_F^2}{\|\hat{\mathbf{X}} \cdot \mathbf{X}^{\text{in}}\|_F^2},$$

719 where  $(\cdot)$  denotes element-wise multiplication.

## 720 Real data studies

721 To quantify the similarity and dissimilarity between signal and noise correlation estimates, we  
722 used a statistic based on the Tanimoto similarity metric (*Lipkus, 1999*), denoted by  $T_s(\mathbf{X}, \mathbf{Y})$  for  
723 two matrices  $\mathbf{X}$  and  $\mathbf{Y}$ . For two vectors  $\mathbf{a}$  and  $\mathbf{b}$  with *non-negative* entries, the Tanimoto coefficient  
724 (*Lipkus, 1999*) is defined as:

$$T(\mathbf{a}, \mathbf{b}) := \frac{\mathbf{a}^T \mathbf{b}}{\mathbf{a}^T \mathbf{a} + \mathbf{b}^T \mathbf{b} - \mathbf{a}^T \mathbf{b}}.$$

725 The Tanimoto similarity metric between two matrices can be defined in a similar manner, by  
726 vectorizing the matrices. Thus, we formulated a similarity metric between two correlation matrices  
727  $\mathbf{X}$  and  $\mathbf{Y}$  as follows. Let  $\mathbf{X}^+ := \max\{\mathbf{X}, \mathbf{0I}\}$  and  $\mathbf{X}^- := \max\{-\mathbf{X}, \mathbf{0I}\}$ , with the  $\max\{\cdot, \cdot\}$  operator  
728 interpreted element-wise. Note that  $\mathbf{X} = \mathbf{X}^+ - \mathbf{X}^-$ , and  $\mathbf{X}^+, \mathbf{X}^-$  have non-negative entries. We then  
729 defined the similarity matrix by combining those of the positive and negative parts as follows:

$$T_s(\mathbf{X}, \mathbf{Y}) := \epsilon T(\mathbf{X}^+, \mathbf{Y}^+) + (1 - \epsilon) T(\mathbf{X}^-, \mathbf{Y}^-)$$

730 where  $\epsilon \in [0, 1]$  denotes the percentage of positive entries in  $\mathbf{X}$  and  $\mathbf{Y}$ . As a measure of dissimilarity,  
731 we used  $T_d(\mathbf{X}, \mathbf{Y}) := 1 - T_s(\mathbf{X}, \mathbf{Y})$ . The values of  $T_d(\hat{\mathbf{S}}, \hat{\mathbf{N}})$  in **Table 1** and  $T_s(\hat{\mathbf{N}}_{\text{spon}}, \hat{\mathbf{N}}_{\text{stim}})$  and  $T_d(\hat{\mathbf{S}}_{\text{stim}}, \hat{\mathbf{N}}_{\text{stim}})$   
732 reported in **Table 2** were obtained based on the foregoing definitions.

733 To further assess the statistical significance of these results, we performed following randomized  
734 tests. To test the significance of  $T_s(\hat{\mathbf{N}}_{\text{spon}}, \hat{\mathbf{N}}_{\text{stim}})$ , for each comparison and each algorithm, we fixed the  
735 first matrix (i.e.  $\hat{\mathbf{N}}_{\text{spon}}$ ) and randomly shuffled the entries of the second one ( $\hat{\mathbf{N}}_{\text{stim}}$  in both cases) while  
736 respecting symmetry. We repeated this procedure for 10000 trials, to derive the null distributions  
737 that represented the probabilities of chance occurrence of similarities between two random groups  
738 of neurons.

739 To test the significance of  $T_d(\hat{\mathbf{S}}, \hat{\mathbf{N}})$  and  $T_d(\hat{\mathbf{S}}_{\text{stim}}, \hat{\mathbf{N}}_{\text{stim}})$ , for each comparison and each algorithm,  
740 again we fixed the first matrix (i.e. signal correlations). Then, we formed the elements of the  
741 second matrix (akin to noise correlations) as follows. For each element of the second matrix, we  
742 assigned either the same element as the signal correlations (in order to model the leakage effect)  
743 or a random noise (with same variance as the elements in the noise correlation matrix) with equal  
744 probability. As before, we repeated this procedure for 10000 trials, to derive the null distributions  
745 that represent the probabilities of chance occurrence of dissimilarities between two matrices that  
746 have some leakage between them.



## 747 **Hyper-parameter tuning**

748 The hyper-parameters that directly affect the proposed estimation are the inverse Wishart prior  
 749 hyper-parameters:  $\boldsymbol{\psi}_x$  and  $\rho_x$ . Given that  $\rho_x$  appears in the form of  $\gamma_x := TL + \rho_x$ , we will consider  $\boldsymbol{\psi}_x$   
 750 and  $\gamma_x$  as the main hyper-parameters for simplicity. Here, we propose a criterion for choosing these  
 751 two hyper-parameters in a data-driven fashion, which will then be used to construct the estimates  
 752 of the noise covariance matrix  $\hat{\boldsymbol{\Sigma}}_x$  and weight matrix  $\hat{\mathbf{D}}$ . Due to the hierarchy of hidden layers in  
 753 our model, an empirical Bayes approach for hyper-parameter selection using a likelihood-based  
 754 performance metric is not straightforward. Hence, we propose an alternative empirical method for  
 755 hyper-parameter selection as follows.

756 For a given choice of  $\boldsymbol{\psi}_x$  and  $\gamma_x$ , we estimate  $\hat{\boldsymbol{\Sigma}}_x$  and  $\hat{\mathbf{D}}$  following the proposed method. Then,  
 757 based on the generative model in Proposed forward model, and using the estimated values of  $\hat{\boldsymbol{\Sigma}}_x$   
 758 and  $\hat{\mathbf{D}}$ , we sample an ensemble of simulated fluorescence traces  $\hat{\mathbf{y}} = \{\hat{\mathbf{y}}_t^{(l)}\}_{t,l=1}^{T,L}$ , and compute the  
 759 metric  $d(\boldsymbol{\psi}_x, \gamma_x)$ :

$$d(\boldsymbol{\psi}_x, \gamma_x) := D_{\text{frob}}(\text{cov}(\hat{\mathbf{y}}, \hat{\mathbf{y}}), \text{cov}(\mathbf{y}, \mathbf{y})),$$

760 where  $\text{cov}(\cdot)$  denotes the empirical covariance and  $D_{\text{frob}}(\mathbf{X}, \mathbf{Y}) := \|\mathbf{X} - \mathbf{Y}\|_F^2$ . Note that  $D_{\text{frob}}(\mathbf{X}, \mathbf{Y})$   
 761 is strictly convex in  $\mathbf{X}$ . Thus, minimizing  $D_{\text{frob}}(\mathbf{X}, \mathbf{Y})$  over  $\mathbf{X}$  for a given  $\mathbf{Y}$  has a unique solution.  
 762 Accordingly, we observe that  $d(\boldsymbol{\psi}_x, \gamma_x)$  is minimized when  $\text{cov}(\hat{\mathbf{y}}, \hat{\mathbf{y}})$  is nearest to  $\text{cov}(\mathbf{y}, \mathbf{y})$ . Therefore,  
 763 the corresponding estimates  $\hat{\boldsymbol{\Sigma}}_x$  and  $\hat{\mathbf{D}}$  that generated  $\hat{\mathbf{y}}$ , best match the second-order statistics of  $\mathbf{y}$   
 764 that was generated by the true parameters  $\boldsymbol{\Sigma}_x$  and  $\mathbf{D}$ .

765 The typically low spiking rate of sensory neurons observed in practice may render the estimation  
 766 problem ill-posed. It is thus important to have an accurate choice of the scale matrix  $\boldsymbol{\psi}_x$  in the  
 767 prior distribution. However, an exhaustive search for optimal tuning of  $\boldsymbol{\psi}_x$  is not computationally  
 768 feasible, given that it has  $N(N+1)/2$  free variables. Thus, the main challenge here is finding the  
 769 optimal choice of the scale matrix  $\boldsymbol{\psi}_{x,\text{opt}}$ .

770 To address this challenge, we propose the following method. First, we fix  $\boldsymbol{\psi}_{x,\text{init}} = \tau \mathbf{I}$ , where  $\tau$  is a  
 771 scalar and  $\mathbf{I} \in \mathbb{R}^{N \times N}$  is the identity matrix. Next, given  $\boldsymbol{\psi}_{x,\text{init}}$  we find the optimal choice of  $\gamma_x$  as:

$$\gamma_{x,\text{init}} = \underset{\gamma_x \in S_\gamma}{\text{argmin}} d(\boldsymbol{\psi}_{x,\text{init}}, \gamma_x),$$

772 where  $S_\gamma$  is a finite set of candidate solutions for  $\gamma_x > N - 1$ . Let  $\hat{\boldsymbol{\Sigma}}_{x,\text{init}}$  denote the noise covariance  
 773 estimate corresponding to hyper-parameters  $(\boldsymbol{\psi}_{x,\text{init}}, \gamma_{x,\text{init}})$ . We will next use  $\hat{\boldsymbol{\Sigma}}_{x,\text{init}}$  to find a suitable  
 774 choice of  $\boldsymbol{\psi}_x$ . To this end, we first fix  $\gamma_{x,\text{opt}} := TL + \tilde{\rho}_x$ , for some  $N - 1 < \tilde{\rho}_x \ll TL$ . Note that by  
 775 choosing  $\tilde{\rho}_x$  to be much smaller than  $TL$ , the final estimates become less sensitive to the choice of  
 776  $\gamma_x$ . Then, we construct a candidate set  $S_\psi$  for  $\boldsymbol{\psi}_{x,\text{opt}}$  by scaling  $\hat{\boldsymbol{\Sigma}}_{x,\text{init}}$  with a finite set of scalars  $\eta \in \mathbb{R}^+$ :  
 777  $S_\psi = \{\eta \hat{\boldsymbol{\Sigma}}_{x,\text{init}}, \eta \in \mathbb{R}^+\}$ . To select  $\boldsymbol{\psi}_{x,\text{opt}}$ , we match it with the choice of  $\gamma_{x,\text{opt}}$  by solving:

$$\boldsymbol{\psi}_{x,\text{opt}} = \underset{\boldsymbol{\psi}_x \in S_\psi}{\text{argmin}} d(\boldsymbol{\psi}_x, \gamma_{x,\text{opt}}).$$

778 Finally, we use these hyper-parameters  $(\boldsymbol{\psi}_{x,\text{opt}}, \gamma_{x,\text{opt}})$  to obtain the estimators  $\hat{\boldsymbol{\Sigma}}_x$  and  $\hat{\mathbf{D}}$  as the output  
 779 of the algorithm.

## 780 **Experimental procedures**

781 All procedures were approved by the University of Maryland Institutional Animal Care and Use  
 782 Committee. Imaging experiments were performed on a P60 (for real data study 1) and P83 (for real  
 783 data study 2) female F1 offspring of the CBA/CaJ strain (The Jackson Laboratory; stock #000654)  
 784 crossed with transgenic C57BL/6J-Tg(Thy1-GCaMP6s)GP4.3Dkim/J mice (The Jackson Laboratory;  
 785 stock #024275) (CBAXThy1), and F1 (CBAXC57). The third real data study was performed on data  
 786 from P66-P93 and P166-P178 mice (see [Bowen et al. \(2020\)](#) for more details). We used the F1  
 787 generation of the crossed mice because they have good hearing into adulthood ([Frisina et al.,](#)  
 788 [2011](#)).

789 We performed cranial window implantation and 2-photon imaging as previously described in  
790 *Francis et al. (2018)*; *Liu et al. (2019)*; *Bowen et al. (2019)*. Briefly, we implanted a cranial window  
791 of 3 mm in diameter over the left auditory cortex. We used a scanning microscope (Bergamo II  
792 series, B248, Thorlabs) coupled to Insight X3 laser (Spectra-physics) (study 1) or pulsed femtosecond  
793 Ti:Sapphire 2-photon laser with dispersion compensation (Vision S, Coherent) (studies 2 and 3) to  
794 image GCaMP6s fluorescence from individual neurons in awake head-fixed mice with an excitation  
795 wavelengths of  $\lambda = 920$  nm and  $\lambda = 940$  nm, respectively. The microscope was controlled by  
796 ThorImageLS software. The size of the field of view was  $370 \times 370 \mu\text{m}$ . Imaging frames of  $512 \times 512$   
797 pixels (pixel size  $0.72 \mu\text{m}$ ) were acquired at 30 Hz by bidirectional scanning of an 8 kHz resonant  
798 scanner. The imaging depth was around  $200 \mu\text{m}$  below pia. A circular ROI was manually drawn over  
799 the cell body to extract fluorescence traces from individual cells.

#### 800 Stimuli for real data study 1

801 During imaging experiments, we presented 4 tones (4, 8, 16 and 32 kHz) at 70 dB SPL. The tones  
802 were 2 s in duration with an inter-trial silence of 4 s. For the sequence of tones, we first generated  
803 a randomized sequence that consisted of 5 repeats for each tone (20 tones in total) and then the  
804 same sequence was repeated for 10 trials.

#### 805 Stimuli for real data study 2

806 During imaging experiments, we presented 97 repetitions of a 75 dB SPL 100 ms broadband noise  
807 (4–48 kHz; 8 s inter-stimulus intervals). Spontaneous neuronal activity was collected from activity  
808 during 113 randomly interleaved periods of silence (8.1 s) between 1 s long noise presentations.

#### 809 Stimuli for real data study 3

810 During imaging experiments, sounds were played at four sound levels (20, 40, 60, and 80 dB SPL).  
811 Auditory stimuli consisted of sinusoidal amplitude-modulated (SAM) tones (20 Hz modulation,  
812 cosine phase), ranging from 3–48 kHz. The frequency resolution was 2 tones/octave (0.5 octave  
813 spacing) and each of these tonal stimuli was 1 s long, repeated five times with a 4–6 s inter-stimulus  
814 interval (see *Bowen et al. (2020)* for details).

## 815 Acknowledgments

816 This work is supported in part by the National Science Foundation Award No. 1807216 (BB) and the  
817 National Institutes of Health Award No. 1U19NS107464 (BB & POK). The authors would like to thank  
818 Daniel E. Winkowski for collecting the data in *Bowen et al. (2019)* that was also used in this work.

## 819 References

- 820 **Abbott LF**, Dayan P. The effect of correlated variability on the accuracy of a population code. *Neural Computation*.  
821 1999; 11(1):91–101. <https://doi.org/10.1162/089976699300016827>, doi: 10.1162/089976699300016827.
- 822 **Ahrens MB**, Orger MB, Robson DN, Li JM, Keller PJ. Whole-brain functional imaging at cellular resolution using  
823 light-sheet microscopy. *Nature methods*. 2013; 10(5):413. <https://doi.org/10.1038/nmeth.2434>.
- 824 **Aitchison L**, Russell L, Packer AM, Yan J, Castonguay P, Hausser M, Turaga SC. Model-based Bayesian inference  
825 of neural activity and connectivity from all-optical interrogation of a neural circuit. In: *Advances in Neural*  
826 *Information Processing Systems*; 2017. p. 3486–3495. [http://papers.nips.cc/paper/6940-model-based-bayesian-](http://papers.nips.cc/paper/6940-model-based-bayesian-inference-of-neural-activity-and-connectivity-from-all-optical-interrogation-of-a-neural-circuit.pdf)  
827 [inference-of-neural-activity-and-connectivity-from-all-optical-interrogation-of-a-neural-circuit.pdf](http://papers.nips.cc/paper/6940-model-based-bayesian-inference-of-neural-activity-and-connectivity-from-all-optical-interrogation-of-a-neural-circuit.pdf).
- 828 **Averbeck BB**, Latham PE, Pouget A. Neural correlations, population coding and computation. *Nature Reviews*  
829 *Neuroscience*. 2006; 7(5):358–366. <https://doi.org/10.1038/nrn1888>.
- 830 **Ba D**, Babadi B, Purdon PL, Brown EN. Convergence and Stability of Iteratively Re-weighted Least Squares  
831 Algorithms. *IEEE Transactions on Signal Processing*. 2014 Jan; 62(1):183–195. doi: 10.1109/TSP.2013.2287685.
- 832 **Bartolo R**, Saunders RC, Mitz AR, Averbeck BB. Information-Limiting Correlations in Large Neural Popula-  
833 tions. *Journal of Neuroscience*. 2020; 40(8):1668–1678. <https://www.jneurosci.org/content/40/8/1668>, doi:  
834 [10.1523/JNEUROSCI.2072-19.2019](https://doi.org/10.1523/JNEUROSCI.2072-19.2019).

- 835 **Beal MJ**. Variational algorithms for approximate Bayesian inference. PhD thesis, University of London, University  
836 College London (United Kingdom); 2003.
- 837 **Bishop CM**. Pattern Recognition and Machine Learning (Information Science and Statistics). Berlin, Heidelberg:  
838 Springer-Verlag; 2006.
- 839 **Blei DM**, Kucukelbir A, McAuliffe JD. Variational inference: A review for statisticians. *Journal of the American*  
840 *Statistical Association*. 2017; 112(518):859–877. doi: <https://doi.org/10.1080/01621459.2017.1285773>.
- 841 **Boucheron S**, Lugosi G, Massart P. Concentration Inequalities: A Nonasymptotic Theory of Independence. OUP  
842 Oxford; 2013.
- 843 **Bowen Z**, Winkowski DE, Kanold PO. Functional organization of mouse primary auditory cortex in adult C57BL/6  
844 and F1 (CBAx C57) mice. *Scientific Reports*. 2020; 10(10905). <https://doi.org/10.1038/s41598-020-67819-4>.
- 845 **Bowen Z**, Winkowski DE, Seshadri S, Plenz D, Kanold PO. Neuronal Avalanches in Input and Associative Layers  
846 of Auditory Cortex. *Frontiers in Systems Neuroscience*. 2019; 13:45. <https://www.frontiersin.org/article/10.3389/fnsys.2019.00045>, doi: [10.3389/fnsys.2019.00045](https://doi.org/10.3389/fnsys.2019.00045).
- 848 **Brown EN**, Barbieri R, Ventura V, Kass RE, Frank LM. The Time-rescaling Theorem and Its Application to  
849 Neural Spike Train Data Analysis. *Neural Comput*. 2002 Feb; 14(2):325–346. <https://doi.org/10.1162/08997660252741149>.
- 851 **Cohen M**, Kohn A. Measuring and interpreting neuronal correlations. *Nature Neuroscience*. 2011; 14(7):811–819.  
852 <https://doi.org/10.1038/nn.2842>.
- 853 **Cohen MR**, Maunsell JH. Attention improves performance primarily by reducing interneuronal correlations.  
854 *Nature Neuroscience*. 2009; 12(12):1594. doi: <https://doi.org/10.1038/nn.2439>.
- 855 **De Vico Fallani F**, Corazzol M, Sternberg JR, Wyart C, Chavez M. Hierarchy of Neural Organization in the Embry-  
856 onic Spinal Cord: Granger-Causality Graph Analysis of In Vivo Calcium Imaging Data. *IEEE Transactions on*  
857 *Neural Systems and Rehabilitation Engineering*. 2015 May; 23(3):333–341. doi: [10.1109/TNSRE.2014.2341632](https://doi.org/10.1109/TNSRE.2014.2341632).
- 858 **Deneux T**, Kaszas A, Szalay G, Katona G, Lakner T, Grinvald A, Rózsa B, Vanzetta I. Accurate spike estimation  
859 from noisy calcium signals for ultrafast three-dimensional imaging of large neuronal populations in vivo.  
860 *Nature Communications*. 2016; 7(1):1–17. doi: <https://doi.org/10.1038/ncomms12190>.
- 861 **Ecker AS**, Berens P, Cotton RJ, Subramaniyan M, Denfield GH, Cadwell CR, Smirnakis SM, Bethge  
862 M, Tolias AS. State Dependence of Noise Correlations in Macaque Primary Visual Cortex. *Neu-*  
863 *ron*. 2014; 82(1):235 – 248. <http://www.sciencedirect.com/science/article/pii/S0896627314001044>, doi:  
864 <https://doi.org/10.1016/j.neuron.2014.02.006>.
- 865 **Eden U**, Frank L, Barbieri R, Solo V, Brown E. Dynamic analysis of neural encoding by point process adaptive  
866 filtering. *Neural Computation*. 2004; 16(5):971–998. <https://www.mitpressjournals.org/doi/abs/10.1162/089976604773135069>.
- 868 **Forli A**, Vecchia D, Binini N, Succol F, Bovetti S, Moretti C, Nespoli F, Mahn M, Baker CA, Bolton MM, et al.  
869 Two-photon bidirectional control and imaging of neuronal excitability with high spatial resolution in vivo. *Cell*  
870 *reports*. 2018; 22(11):3087–3098. <https://doi.org/10.1016/j.celrep.2018.02.063>.
- 871 **Francis NA**, Winkowski DE, Sheikhattar A, Armengol K, Babadi B, Kanold PO. Small Networks Encode Decision-  
872 Making in Primary Auditory Cortex. *Neuron*. 2018; 97(4):885 – 897.e6. [http://www.sciencedirect.com/science/](http://www.sciencedirect.com/science/article/pii/S0896627318300229)  
873 [article/pii/S0896627318300229](http://www.sciencedirect.com/science/article/pii/S0896627318300229), doi: <https://doi.org/10.1016/j.neuron.2018.01.019>.
- 874 **Friedrich J**, Zhou P, Paninski L. Fast online deconvolution of calcium imaging data. *PLOS Computational Biology*.  
875 2017 03; 13(3):1–26. <https://doi.org/10.1371/journal.pcbi.1005423>, doi: [10.1371/journal.pcbi.1005423](https://doi.org/10.1371/journal.pcbi.1005423).
- 876 **Frisina RD**, Singh A, Bak M, Bozorg S, Seth R, Zhu X. F1 (CBAx C57) mice show superior hearing in old age  
877 relative to their parental strains: Hybrid vigor or a new animal model for “Golden Ears”? *Neurobiology of*  
878 *aging*. 2011; 32(9):1716–1724. <http://www.sciencedirect.com/science/article/pii/S0197458009003157>, doi:  
879 <https://doi.org/10.1016/j.neurobiolaging.2009.09.009>.
- 880 **Gawne T**, Richmond B. How independent are the messages carried by adjacent inferior temporal cortical  
881 neurons? *Journal of Neuroscience*. 1993; 13(7):2758–2771. <https://www.jneurosci.org/content/13/7/2758>, doi:  
882 [10.1523/JNEUROSCI.13-07-02758.1993](https://doi.org/10.1523/JNEUROSCI.13-07-02758.1993).

- 883 **Grewe BF**, Langer D, Kasper H, Kampa BM, Helmchen F. High-speed in vivo calcium imaging reveals  
884 neuronal network activity with near-millisecond precision. *Nature Methods*. 2010; 7(5):399. doi:  
885 <https://doi.org/10.1038/nmeth.1453>.
- 886 **Hansen BJ**, Chelaru MI, Dragoi V. Correlated variability in laminar cortical circuits. *Neuron*. 2012; 76(3):590–602.  
887 doi: <https://doi.org/10.1016/j.neuron.2012.08.029>.
- 888 **Hastings WK**. Monte Carlo sampling methods using Markov chains and their applications. *Biometrika*. 1970;  
889 57(1):97–109. <https://www.jstor.org/stable/2334940>.
- 890 **Jewell SW**, Hocking TD, Fearnhead P, Witten DM. Fast nonconvex deconvolution of calcium imaging data.  
891 *Biostatistics*. 2020 October; 21. <https://doi.org/10.1093/biostatistics/kxy083>.
- 892 **Jewell SW**, Witten DM. Exact spike train inference via  $\ell_0$  optimization. *The Annals of Applied Statistics*. 2018;  
893 12(4):2457–2482. <https://projecteuclid.org/euclid.aos/1542078052>.
- 894 **Jordan MI**, Ghahramani Z, Jaakkola TS, Saul LK. An introduction to variational methods for graphical models.  
895 *Machine Learning*. 1999; 37(2):183–233. doi: <https://doi.org/10.1023/A:1007665907178>.
- 896 **Josić K**, Shea-Brown E, Doiron B, de la Rocha J. Stimulus-dependent correlations and population  
897 codes. *Neural Computation*. 2009; 21(10):2774–2804. <https://doi.org/10.1162/neco.2009.10-08-879>, doi:  
898 [10.1162/neco.2009.10-08-879](https://doi.org/10.1162/neco.2009.10-08-879), pMID: 19635014.
- 899 **Kadirvelu B**, Hayashi Y, Nasuto SJ. Inferring structural connectivity using Ising couplings in models of neuronal  
900 networks. *Scientific Reports*. 2017 aug; 7(1). doi: <https://doi.org/10.1038/s41598-017-05462-2>.
- 901 **Kazemipour A**, Liu J, Solarana K, Nagode DA, Kanold PO, Wu M, Babadi B. Fast and Stable Signal Deconvolution  
902 via Compressible State-Space Models. *IEEE Transactions on Biomedical Engineering*. 2018 Jan; 65(1):74–86.  
903 doi: <https://doi.org/10.1109/TBME.2017.2694339>.
- 904 **Keeley SL**, Aoi MC, Yu Y, Smith SL, Pillow JW. Identifying signal and noise structure in neural population activity  
905 with Gaussian process factor models. In: Larochelle H, Ranzato M, Hadsell R, Balcan MF, Lin H, editors.  
906 *Advances in Neural Information Processing Systems 33* Curran Associates, Inc.; 2020. [https://papers.nips.cc/  
907 paper/2020/file/9eed867b73ab1eab60583c9d4a789b1b-Paper.pdf](https://papers.nips.cc/paper/2020/file/9eed867b73ab1eab60583c9d4a789b1b-Paper.pdf).
- 908 **Kerlin A**, Mohar B, Flickinger D, MacLennan BJ, Dean MB, Davis C, Spruston N, Svoboda K. Functional clustering  
909 of dendritic activity during decision-making. *eLife*. 2019 oct; 8:e46966. <https://doi.org/10.7554/eLife.46966>,  
910 doi: [10.7554/eLife.46966](https://doi.org/10.7554/eLife.46966).
- 911 **Kohn A**, Coen-Cagli R, Kanitscheider I, Pouget A. Correlations and Neuronal Population Information. *Annual*  
912 *Review of Neuroscience*. 2016; 39(1):237–256. doi: <https://doi.org/10.1146/annurev-neuro-070815-013851>,  
913 pMID: 27145916.
- 914 **Kohn A**, Smith MA. Stimulus Dependence of Neuronal Correlation in Primary Visual Cortex of the Macaque.  
915 *Journal of Neuroscience*. 2005; 25(14):3661–3673. <https://www.jneurosci.org/content/25/14/3661>, doi:  
916 [10.1523/JNEUROSCI.5106-04.2005](https://doi.org/10.1523/JNEUROSCI.5106-04.2005).
- 917 **Linderman S**, Adams RP, Pillow JW. Bayesian latent structure discovery from multi-neuron recordings. In:  
918 *Advances in Neural Information Processing Systems*; 2016. p. 2002–2010. [http://papers.nips.cc/paper/6185-  
919 bayesian-latent-structure-discovery-from-multi-neuron-recordings.pdf](http://papers.nips.cc/paper/6185-bayesian-latent-structure-discovery-from-multi-neuron-recordings.pdf).
- 920 **Lipkus AH**. A proof of the triangle inequality for the Tanimoto distance. *Journal of Mathematical Chemistry*.  
921 1999 Oct; 26(1):263–265. <https://doi.org/10.1023/A:1019154432472>.
- 922 **Liu J**, Whiteway MR, Sheikhattar A, Butts DA, Babadi B, Kanold PO. Parallel Processing of Sound Dynamics across  
923 Mouse Auditory Cortex via Spatially Patterned Thalamic Inputs and Distinct Areal Intracortical Circuits. *Cell*  
924 *Reports*. 2019; 27(3):872 – 885.e7. <http://www.sciencedirect.com/science/article/pii/S2211124719303997>, doi:  
925 <https://doi.org/10.1016/j.celrep.2019.03.069>.
- 926 **Lyamzin DR**, Barnes SJ, Donato R, Garcia-Lazaro JA, Keck T, Lesica NA. Nonlinear Transfer of Signal and Noise  
927 Correlations in Cortical Networks. *Journal of Neuroscience*. 2015; 35(21):8065–8080. [https://www.jneurosci.  
928 org/content/35/21/8065](https://www.jneurosci.org/content/35/21/8065), doi: [10.1523/JNEUROSCI.4738-14.2015](https://doi.org/10.1523/JNEUROSCI.4738-14.2015).
- 929 **Lüttcke H**, Gerhard F, Zenke F, Gerstner W, Helmchen F. Inference of neuronal network spike dynamics and  
930 topology from calcium imaging data. *Frontiers in Neural Circuits*. 2013; 7:201. [https://www.frontiersin.org/  
931 article/10.3389/fncir.2013.00201](https://www.frontiersin.org/article/10.3389/fncir.2013.00201), doi: [10.3389/fncir.2013.00201](https://doi.org/10.3389/fncir.2013.00201).

- 932 **Martin DA**, Ribeiro TL, Cannas SA, Grigera TS, Plenz D, Chialvo DR. Box-scaling as a proxy of finite-size correla-  
933 tions; 2020. <https://arxiv.org/abs/2007.08236>.
- 934 **Meng X**, Kao JP, Lee HK, Kanold PO. Intracortical circuits in thalamorecipient layers of auditory cortex refine  
935 after visual deprivation. *Eneuro*. 2017; 4(2). <https://www.eneuro.org/content/4/2/ENEURO.0092-17.2017>, doi:  
936 [10.1523/ENEURO.0092-17.2017](https://doi.org/10.1523/ENEURO.0092-17.2017).
- 937 **Meng X**, Winkowski DE, Kao JP, Kanold PO. Sublaminar subdivision of mouse auditory cortex layer 2/3 based  
938 on functional translaminar connections. *Journal of Neuroscience*. 2017; 37(42):10200–10214. <https://www.jneurosci.org/content/37/42/10200>, doi: [10.1523/JNEUROSCI.1361-17.2017](https://doi.org/10.1523/JNEUROSCI.1361-17.2017).
- 940 **Mishchenko Y**, Vogelstein J, Paninski L. A Bayesian approach for inferring neuronal connectivity from calcium  
941 fluorescent imaging data. *Annals of Applied Statistics*. 2011; 5(2B):1229–1261. [https://www.jstor.org/stable/](https://www.jstor.org/stable/23024850)  
942 [23024850](https://www.jstor.org/stable/23024850).
- 943 **Montijn JS**, Vinck M, Pennartz CMA. Population coding in mouse visual cortex: response reliability and  
944 dissociability of stimulus tuning and noise correlation. *Frontiers in Computational Neuroscience*. 2014; 8:58.  
945 <https://www.frontiersin.org/article/10.3389/fncom.2014.00058>, doi: [10.3389/fncom.2014.00058](https://doi.org/10.3389/fncom.2014.00058).
- 946 **Najafi F**, Elsayed GF, Cao R, Pnevmatikakis E, Latham PE, Cunningham JP, Churchland AK. Excitatory and Inhibitory  
947 Subnetworks Are Equally Selective during Decision-Making and Emerge Simultaneously during Learning.  
948 *Neuron*. 2020; 105(1):165 – 179.e8. <http://www.sciencedirect.com/science/article/pii/S0896627319308487>,  
949 doi: <https://doi.org/10.1016/j.neuron.2019.09.045>.
- 950 **Pachitariu M**, Stringer C, Harris KD. Robustness of Spike Deconvolution for Neuronal Calcium Imaging.  
951 *Journal of Neuroscience*. 2018; 38(37):7976–7985. <https://www.jneurosci.org/content/38/37/7976>, doi:  
952 [10.1523/JNEUROSCI.3339-17.2018](https://doi.org/10.1523/JNEUROSCI.3339-17.2018).
- 953 **Paninski L**. Maximum likelihood estimation of cascade point-process neural encoding models. *Network:*  
954 *Computation in Neural Systems*. 2004; 15(4):243–262. [https://doi.org/10.1088/0954-898X\\_15\\_4\\_002](https://doi.org/10.1088/0954-898X_15_4_002).
- 955 **Petrus E**, Isaiah A, Jones AP, Li D, Wang H, Lee HK, Kanold PO. Crossmodal Induction of Thalamocortical  
956 Potentiation Leads to Enhanced Information Processing in the Auditory Cortex. *Neuron*. 2014; 81(3):664 –  
957 673. <http://www.sciencedirect.com/science/article/pii/S089662731301091X>.
- 958 **Pillow JW**, Scott J. Fully Bayesian inference for neural models with negative-binomial spiking. In: Pereira F,  
959 Burges CJC, Bottou L, Weinberger KQ, editors. *Advances in Neural Information Processing Systems 25* Curran  
960 Associates, Inc.; 2012.p. 1898–1906. [http://papers.nips.cc/paper/4567-fully-bayesian-inference-for-neural-](http://papers.nips.cc/paper/4567-fully-bayesian-inference-for-neural-models-with-negative-binomial-spiking.pdf)  
961 [models-with-negative-binomial-spiking.pdf](http://papers.nips.cc/paper/4567-fully-bayesian-inference-for-neural-models-with-negative-binomial-spiking.pdf).
- 962 **Pnevmatikakis E**, Soudry D, Gao Y, Machado TA, Merel J, Pfau D, Reardon T, Mu Y, Lacefield C, Yang W, Ahrens  
963 M, Bruno R, Jessell TM, Peterka D, Yuste R, Paninski L. Simultaneous Denoising, Deconvolution, and Demixing  
964 of Calcium Imaging Data. *Neuron*. 2016; 89(2):285–299. doi: <https://doi.org/10.1016/j.neuron.2015.11.037>.
- 965 **Polson NG**, Scott JG, Windle J. Bayesian Inference for Logistic Models Using Pólya–Gamma Latent Variables.  
966 *Journal of the American Statistical Association*. 2013; 108(504):1339–1349. [https://www.jstor.org/stable/](https://www.jstor.org/stable/24247065)  
967 [24247065](https://www.jstor.org/stable/24247065).
- 968 **Ramesh RN**, Burgess CR, Sugden AU, Gyetvan M, Andermann ML. Intermingled ensembles in visual as-  
969 sociation cortex encode stimulus identity or predicted outcome. *Neuron*. 2018; 100(4):900–915. doi:  
970 <https://doi.org/10.1016/j.neuron.2018.09.024>.
- 971 **Rauch HE**, Tung F, Striebel CT. Maximum likelihood estimates of linear dynamic systems. *AIAA Journal*. 1965;  
972 3(8):1445–1450. <https://doi.org/10.2514/3.3166>, doi: [10.2514/3.3166](https://doi.org/10.2514/3.3166).
- 973 **Romano SA**, Pérez-Schuster V, Jouary A, Boulanger-Weill J, Candéo A, Pietri T, Sumbre G. An integrated calcium  
974 imaging processing toolbox for the analysis of neuronal population dynamics. *PLoS Computational Biology*.  
975 2017; 13(6):e1005526. doi: <https://doi.org/10.1371/journal.pcbi.1005526>.
- 976 **Rothschild G**, Nelken I, Mizrahi A. Functional organization and population dynamics in the mouse primary  
977 auditory cortex. *Nature Neuroscience*. 2010; 13(3):353. doi: <https://doi.org/10.1038/nn.2484>.
- 978 **Rumyantsev OI**, Lecoq JA, Hernandez O, Zhang Y, Savall J, Chrapkiewicz R, Li J, Zeng H, Ganguli S, Schnitzer  
979 MJ. Fundamental bounds on the fidelity of sensory cortical coding. *Nature*. 2020 April; 580(7801):100–105.  
980 <https://doi.org/10.1038/s41586-020-2130-2>.

- 981 **Rupasinghe A**, Babadi B. Robust Inference of Neuronal Correlations from Blurred and Noisy Spiking Ob-  
982 servations. In: *2020 54th Annual Conference on Information Sciences and Systems (CISS)*; 2020. p. 1–5.  
983 <https://doi.org/10.1109/CISS48834.2020.1570617409>.
- 984 **Rupasinghe A**, Direct Extraction of Signal and Noise Correlations from Two-Photon Calcium Imaging of Ensemble  
985 Neuronal Activity MATLAB Codes. GitHub Repository; 2020. [https://github.com/Anuththara-Rupasinghe/  
986 Signal-Noise-Correlation](https://github.com/Anuththara-Rupasinghe/Signal-Noise-Correlation).
- 987 **Rupasinghe A**, Francis N, Liu J, Bowen Z, Kanold PO, Babadi B, Experimental Data from ‘Direct Extraction of  
988 Signal and Noise Correlations from Two-Photon Calcium Imaging of Ensemble Neuronal Activity’. Digital  
989 Repository at the University of Maryland (DRUM); 2021. <http://hdl.handle.net/1903/26917>.
- 990 **Shumway RH**, Stoffer DS. An approach to time series smoothing and forecasting using the EM algorithm.  
991 *Journal of time series analysis*. 1982; 3(4):253–264. <https://doi.org/10.1111/j.1467-9892.1982.tb00349.x>.
- 992 **Smith AC**, Brown EN. Estimating a State-space Model from Point Process Observations. *Neural Comput*. 2003  
993 May; 15(5):965–991. <https://doi.org/10.1162/089976603765202622>.
- 994 **Smith MA**, Sommer MA. Spatial and temporal scales of neuronal correlation in visual area V4. *Journal of*  
995 *Neuroscience*. 2013; 33(12):5422–5432. <https://doi.org/10.1523/JNEUROSCI.2929-08.2008>.
- 996 **Sompolinsky H**, Yoon H, Kang K, Shamir M. Population coding in neuronal systems with correlated noise. *Phys*  
997 *Rev E*. 2001 Oct; 64:051904. <https://link.aps.org/doi/10.1103/PhysRevE.64.051904>.
- 998 **Soudry D**, Keshri S, Stinson P, Oh Mh, Iyengar G, Paninski L. Efficient "shotgun" inference of neural connectivity  
999 from highly sub-sampled activity data. *PLoS Computational Biology*. 2015; 11(10). [https://doi.org/10.1371/  
1000 journal.pcbi.1004464](https://doi.org/10.1371/journal.pcbi.1004464).
- 1001 **Stosiek C**, Garaschuk O, Holthoff K, Konnerth A. In vivo two-photon calcium imaging of neuronal networks.  
1002 *Proceedings of the National Academy of Sciences*. 2003; 100(12):7319–7324. [https://doi.org/10.1073/pnas.  
1003 1232232100](https://doi.org/10.1073/pnas.1232232100).
- 1004 **Stringer C**, Pachitariu M. Computational processing of neural recordings from calcium imaging data. *Current*  
1005 *Opinion in Neurobiology*. 2019; 55:22–31. <https://doi.org/10.1016/j.conb.2018.11.005>.
- 1006 **Svoboda K**, Yasuda R. Principles of Two-Photon Excitation Microscopy and Its Applications to Neuroscience.  
1007 *Neuron*. 2006; 50(6):823 – 839. <https://doi.org/10.1016/j.neuron.2006.05.019>.
- 1008 **Theis L**, Berens P, Froudarakis E, Reimer J, Román Rosón M, Baden T, Euler T, Tolias A, Bethge M. Benchmarking  
1009 Spike Rate Inference in Population Calcium Imaging. *Neuron*. 2016; 90(3):471–482. [https://doi.org/10.1016/j.  
1010 neuron.2016.04.014](https://doi.org/10.1016/j.neuron.2016.04.014).
- 1011 **Truccolo W**, Eden UT, Fellows MR, Donoghue JP, Brown EN. A point process framework for relating neural spiking  
1012 activity to spiking history, neural ensemble, and extrinsic covariate effects. *Journal of Neurophysiology*. 2005;  
1013 93(2):1074–1089. <https://doi.org/10.1152/jn.00697.2004>.
- 1014 **Vinci G**, Ventura V, Smith MA, Kass RE. Separating spike count correlation from firing rate correlation. *Neural*  
1015 *computation*. 2016; 28(5):849–881. [https://www.mitpressjournals.org/doi/full/10.1162/NECO\\_a\\_00831](https://www.mitpressjournals.org/doi/full/10.1162/NECO_a_00831), doi:  
1016 10.1162/NECO\_a\_00831.
- 1017 **Vogelstein JT**, Packer AM, Machado TA, Sippy T, Babadi B, Yuste R, Paninski L. Fast Nonnegative Deconvolution  
1018 for Spike Train Inference From Population Calcium Imaging. *Journal of Neurophysiology*. 2010; 104(6):3691–  
1019 3704. <https://doi.org/10.1152/jn.01073.2009>.
- 1020 **Vogelstein JT**, Watson BO, Packer AM, Yuste R, Jedynak B, Paninski L. Spike inference from calcium imaging  
1021 using sequential Monte Carlo methods. *Biophysical Journal*. 2009; 97(2):636–655. [https://doi.org/10.1016/j.  
1022 bpj.2008.08.005](https://doi.org/10.1016/j.bpj.2008.08.005).
- 1023 **Wang C**, Blei DM. Variational Inference in Nonconjugate Models. *J Mach Learn Res*. 2013 Apr; 14(1):1005–1031.  
1024 doi: <https://dl.acm.org/doi/pdf/10.5555/2567709.2502613>.
- 1025 **Winkowski DE**, Kanold PO. Laminar Transformation of Frequency Organization in Auditory Cortex.  
1026 *Journal of Neuroscience*. 2013; 33(4):1498–1508. <https://www.jneurosci.org/content/33/4/1498>, doi:  
1027 10.1523/JNEUROSCI.3101-12.2013.
- 1028 **Wong R**. *Asymptotic Approximations of Integrals*. Society for Industrial and Applied Mathematics; 2001.  
1029 <https://epubs.siam.org/doi/abs/10.1137/1.9780898719260>.

- 1030 **Yatsenko D**, Josić K, Ecker AS, Froudarakis E, Cotton RJ, Tolias AS. Improved Estimation and Interpretation of  
1031 Correlations in Neural Circuits. *PLOS Computational Biology*. 2015 03; 11(3):1–28. [https://doi.org/10.1371/](https://doi.org/10.1371/journal.pcbi.1004083)  
1032 [journal.pcbi.1004083](https://doi.org/10.1371/journal.pcbi.1004083).
- 1033 **Yu BM**, Cunningham JP, Santhanam G, Ryu SI, Shenoy KV, Sahani M. Gaussian-Process Factor Analysis for  
1034 Low-Dimensional Single-Trial Analysis of Neural Population Activity. *Journal of Neurophysiology*. 2009;  
1035 102(1):614–635. <https://doi.org/10.1152/jn.90941.2008>.
- 1036 **Yu S**, Yang H, Nakahara H, Santos GS, Nikolić D, Plenz D. Higher-Order Interactions Characterized in Cortical  
1037 Activity. *Journal of Neuroscience*. 2011; 31(48):17514–17526. <https://www.jneurosci.org/content/31/48/17514>.

1038 **Appendix 1**

1039

**Relationship to existing definitions of Signal and Noise correlations**

Recall that the conventional definitions of signal and noise covariance of spiking activity between the  $i^{\text{th}}$  and  $j^{\text{th}}$  neuron are (Lyamzin et al., 2015):

1040

$$(\Sigma_s^{\text{con}})_{i,j} = \text{cov}\left(\frac{1}{L} \sum_l n_{t,l}^{(i)}, \frac{1}{L} \sum_l n_{t,l}^{(j)}\right),$$

1041

1042

1043

1044

$$(\Sigma_x^{\text{con}})_{i,j} = \frac{1}{L} \sum_l \text{cov}\left(n_{t,l}^{(i)} - \frac{1}{L} \sum_l n_{t,l}^{(i)}, n_{t,l}^{(j)} - \frac{1}{L} \sum_l n_{t,l}^{(j)}\right),$$

1045

1046

1047

where  $\text{cov}(\mathbf{u}, \mathbf{v}) := \frac{1}{T} \sum_{t=1}^T (\mathbf{u}_t - \frac{1}{T} \sum_{t=1}^T \mathbf{u}_t) (\mathbf{v}_t - \frac{1}{T} \sum_{t=1}^T \mathbf{v}_t)^\top$ , is the empirical covariance. The correlations, are then derived by the standard normalization:

1048

1049

$$(\mathbf{S}^{\text{con}})_{i,j} := \frac{(\Sigma_s^{\text{con}})_{i,j}}{\sqrt{(\Sigma_s^{\text{con}})_{i,i} (\Sigma_s^{\text{con}})_{j,j}}}, \quad (\mathbf{N}^{\text{con}})_{i,j} := \frac{(\Sigma_x^{\text{con}})_{i,j}}{\sqrt{(\Sigma_x^{\text{con}})_{i,i} (\Sigma_x^{\text{con}})_{j,j}}}, \quad \forall i, j = 1, 2, \dots, N. \quad (9)$$

Suppose that the spiking events follow the forward model:

1050

1051

1052

1053

1054

1055

1056

1057

$$\begin{aligned} n_{t,l}^{(j)} &\sim \text{Bernoulli}\left(\lambda_{t,l}^{(j)}\right), \\ \lambda_{t,l}^{(j)} &= \phi\left(\mathbf{x}_{t,l}^{(j)}, \mathbf{d}_j^\top \mathbf{s}_t\right), \end{aligned}$$

where  $\phi : \mathbb{R}^2 \rightarrow [0, 1]$  is a differentiable non-linear mapping. We assume  $\mathbf{x}_{t,l}$  and  $\mathbf{s}_t$  to be independent. Without loss of generality, let  $\mathbb{E}[\mathbf{s}_t] = \mathbf{0}$  and  $\mathbb{E}[\mathbf{x}_{t,l}] = \boldsymbol{\mu}_x$ . Further, we define the notation  $X_t \approx Y_t$  to denote almost sure equivalence, i.e.,  $X_t \xrightarrow{\text{a.s.}} Z$  and  $Y_t \xrightarrow{\text{a.s.}} Z$  for some random variable  $Z$ .

First, let us consider  $(\mathbf{S}^{\text{con}})_{i,j}$ . Noting that  $\mathbb{E}[n_{t,l}^{(j)}] = \mathbb{E}[\lambda_{t,l}^{(j)}]$  and  $\mathbb{E}[n_{t,l}^{(i)} n_{t,l}^{(j)}] = \mathbb{E}[\lambda_{t,l}^{(i)} \lambda_{t,l}^{(j)}]$ , we conclude as  $T \rightarrow \infty$ :

$$(\Sigma_s^{\text{con}})_{i,j} \approx \text{cov}\left(\frac{1}{L} \sum_l \lambda_{t,l}^{(i)}, \frac{1}{L} \sum_l \lambda_{t,l}^{(j)}\right),$$

from the law of large numbers. Then, if we consider the Taylor series expansion of  $\phi\left(\mathbf{x}_{t,l}^{(j)}, \mathbf{d}_j^\top \mathbf{s}_t\right)$  around the mean  $(\boldsymbol{\mu}_x^{(j)}, 0)$ , we get:

$$\begin{aligned} (\Sigma_s^{\text{con}})_{i,j} \approx & \text{cov}\left(\phi\left(\boldsymbol{\mu}_x^{(i)}, 0\right) + \frac{1}{L} \sum_l \left(x_{t,l}^{(i)} - \boldsymbol{\mu}_x^{(i)}\right) \phi_{(x_{t,l}^{(i)})} \left(\boldsymbol{\mu}_x^{(i)}, 0\right) + \left(\mathbf{d}_i^\top \mathbf{s}_t\right) \phi_{(\mathbf{d}_i^\top \mathbf{s}_t)} \left(\boldsymbol{\mu}_x^{(i)}, 0\right) + \epsilon_{t,l}^{(i)}, \right. \\ & \left. \phi\left(\boldsymbol{\mu}_x^{(j)}, 0\right) + \frac{1}{L} \sum_l \left(x_{t,l}^{(j)} - \boldsymbol{\mu}_x^{(j)}\right) \phi_{(x_{t,l}^{(j)})} \left(\boldsymbol{\mu}_x^{(j)}, 0\right) + \left(\mathbf{d}_j^\top \mathbf{s}_t\right) \phi_{(\mathbf{d}_j^\top \mathbf{s}_t)} \left(\boldsymbol{\mu}_x^{(j)}, 0\right) + \epsilon_{t,l}^{(j)}\right), \end{aligned}$$

where  $\epsilon_{t,l}^{(i)}$  and  $\epsilon_{t,l}^{(j)}$  represent the higher order terms. Then, as  $L \rightarrow \infty$ , we get:

$$(\Sigma_s^{\text{con}})_{i,j} \approx \text{cov}\left(\left(\mathbf{d}_i^\top \mathbf{s}_t\right) \phi_{(\mathbf{d}_i^\top \mathbf{s}_t)} \left(\boldsymbol{\mu}_x^{(i)}, 0\right), \left(\mathbf{d}_j^\top \mathbf{s}_t\right) \phi_{(\mathbf{d}_j^\top \mathbf{s}_t)} \left(\boldsymbol{\mu}_x^{(j)}, 0\right)\right) + \epsilon_{i,l},$$

since  $\lim_{L \rightarrow \infty} \frac{1}{L} \sum_{l=1}^L \left(x_{t,l}^{(j)}\right) = \boldsymbol{\mu}_x^{(j)}$  by the Law of Large numbers. Thus, we see that:

$$\begin{aligned} (\Sigma_s^{\text{con}})_{i,j} &\approx C_S \mathbf{d}_i^\top \text{cov}\left(\mathbf{s}_t, \mathbf{s}_t\right) \mathbf{d}_j^\top + \epsilon_{i,l} \\ &= C_S (\Sigma_s)_{i,j} + \epsilon_{i,l}, \end{aligned}$$

where  $C_S$  is a constant and  $\epsilon_{i,l}$  is typically small if the latent process  $\mathbf{x}_{t,l}$  and the stimulus  $\mathbf{s}_t$  are concentrated around their means. Then, the signal correlations are obtained by



1075

1078

1079

1080

1081

1082

1083

1084

1085

1086

1087

1088

1089

1090

1091

1092

1093

1094

1095

1096

1097

1098

1099

1100

1101

1102

1103

1104

1105

1106

1107

1108

1109

1110

1111

1112

1113

1114

1115

normalization of the signal covariance as in **Equation 9**, through which the scaling factor  $C_S$  cancels and we get:

$$(\mathbf{S}^{\text{con}})_{i,j} \approx (\mathbf{S})_{i,j}.$$

Thus, as  $T, L \rightarrow \infty$ , we see that  $\mathbf{S}$  is indeed the signal correlation matrix that is aimed to be approximated by the conventional definitions.

Next, let us consider  $(\mathbf{N}^{\text{con}})_{i,j}$ . Similar to foregoing analysis of the signal covariance, as  $T \rightarrow \infty$  we get:

$$(\boldsymbol{\Sigma}_x^{\text{con}})_{i,j} \approx \frac{1}{L} \sum_l \text{cov} \left( \lambda_{t,l}^{(i)} - \frac{1}{L} \sum_l \lambda_{t,l}^{(i)}, \lambda_{t,l}^{(j)} - \frac{1}{L} \sum_l \lambda_{t,l}^{(j)} \right).$$

Then, from a Taylor series expansion, we get:

$$(\boldsymbol{\Sigma}_x^{\text{con}})_{i,j} \approx \frac{1}{L} \sum_l \text{cov} \left( x_{t,l}^{(i)} \phi_{(x_{t,l}^{(i)})}(\mu_x^{(i)}, 0) - \frac{1}{L} \sum_l x_{t,l}^{(i)} \phi_{(x_{t,l}^{(i)})}(\mu_x^{(i)}, 0) + \xi_{t,l}^{(i)}, \right. \\ \left. x_{t,l}^{(j)} \phi_{(x_{t,l}^{(j)})}(\mu_x^{(j)}, 0) - \frac{1}{L} \sum_l x_{t,l}^{(j)} \phi_{(x_{t,l}^{(j)})}(\mu_x^{(j)}, 0) + \xi_{t,l}^{(j)} \right),$$

where  $\xi_{t,l}^{(i)}$  and  $\xi_{t,l}^{(j)}$  represent the higher order terms. Then, as  $L \rightarrow \infty$ :

$$(\boldsymbol{\Sigma}_x^{\text{con}})_{i,j} \approx \frac{1}{L} \sum_l \text{cov} \left( (x_{t,l}^{(i)} - \mu_x^{(i)}) \phi_{(x_{t,l}^{(i)})}(\mu_x^{(i)}, 0), (x_{t,l}^{(j)} - \mu_x^{(j)}) \phi_{(x_{t,l}^{(j)})}(\mu_x^{(j)}, 0) \right) + \xi_{t,l},$$

from the law of large numbers. Accordingly, we see that:

$$(\boldsymbol{\Sigma}_x^{\text{con}})_{i,j} \approx C_N \frac{1}{L} \sum_l \text{cov} \left( x_{t,l}^{(i)} - \mu_x^{(i)}, x_{t,l}^{(j)} - \mu_x^{(j)} \right) + \xi_{t,l} \\ = C_N (\boldsymbol{\Sigma}_x)_{i,j} + \xi_{t,l},$$

where  $C_N$  is a constant and  $\xi_{t,l}$  is typically small if the latent process  $\mathbf{x}_{t,l}$  and the stimulus  $\mathbf{s}_t$  are concentrated around their means. Then, the noise correlations are derived by normalization of the noise covariance given in **Equation 9**. This cancels out the scaling factor  $C_N$ , and we get:

$$(\mathbf{N}^{\text{con}})_{i,j} \approx (\mathbf{N})_{i,j}.$$

Thus, we similarly conclude that as  $T, L \rightarrow \infty$ , the conventional definition of noise correlation  $\mathbf{N}^{\text{con}}$  indeed aims to approximate  $\mathbf{N}$ .

As a numerical illustration, we demonstrated in **Figure 2–Figure Supplement 2** that the conventional definitions of the correlations indeed approximate our proposed definitions, but require much larger number of trials to be accurate. More specifically, in order to achieve comparable performance to our method using  $L = 20$  trials, the conventional correlation estimates require  $L = 1000$  trials.

## 1116 Appendix 2

### 1117 Proof of Theorem 1

1118 In what follows, we present a comprehensive proof of Theorem 1. Recall the following key  
1119 assumptions:

1120 *Assumption (1).* We assume a scalar time-varying external stimulus (i.e.  $s_t = s_{t'}$ , and hence  
1121  $\mathbf{d}_j = d_j$ ,  $\mathbf{d} = [d_1, d_2, \dots, d_N]^\top$ ). Furthermore, we set the observation noise covariance to be  
1122  $\Sigma_w = \sigma_w^2 \mathbf{I}$ , for notational convenience.

1123 *Assumption (2).* We derive the performance bounds in the regime where  $T$  and  $L$  are  
1124 large, and thus do not impose any prior distribution on the correlations (i.e.,  $p_{\text{pr}}(\Sigma_x) \propto 1$ ),  
1125 which are otherwise needed to mitigate overfitting (see Methods and Materials).

1126 *Assumption (3).* We assume the latent noise process and stimulus to be slowly varying  
1127 signals, and thus adopt a piece-wise constant model in which these processes are constant  
1128 within consecutive windows of length  $W$  (i.e.,  $\mathbf{x}_{t,l} = \mathbf{x}_{W_k,l}$  and  $s_t = s_{W_k}$ , for  $(k-1)W + 1 \leq t < kW$   
1129 and  $k = 1, \dots, K$  with  $W_k = (k-1)W + 1$  and  $KW = T$ ) for our theoretical analysis, as is usually  
1130 done in spike count calculations for conventional noise correlation estimates.

*Proof of Theorem 1.* First, recall the proposed forward model (see Methods and Materials)  
under Assumption (1)–(3):

$$\begin{aligned} \mathbf{y}_{t,l} &= \mathbf{A} \mathbf{z}_{t,l} + \mathbf{w}_{t,l}, \\ \mathbf{z}_{t,l} &= \alpha \mathbf{z}_{t-1,l} + \mathbf{n}_{t,l}, \\ n_{t,l}^{(j)} &\sim \text{Bernoulli} \left( \phi \left( x_{W_k,l}^{(j)} \right) \right), \\ \mathbf{x}_{W_k,l} &\sim \mathcal{N} \left( \boldsymbol{\mu}_x + s_{W_k} \mathbf{d}, \Sigma_x \right), \end{aligned}$$

1131 where  $\phi(\cdot) := \frac{\exp(\cdot)}{1+\exp(\cdot)}$ , is the logistic function. Note that we have re-defined the latent process  
1132  $\mathbf{x}_{t,l}$  by absorbing the stimulus activity  $s_t \mathbf{d}$  to the mean of  $\mathbf{x}_{t,l}$  for notational convenience,  
1133 without loss of generality. Hereafter, we also assume that  $\mathbf{A} = \mathbf{I}$  without loss of gener-  
1134 ality. For a truncation level  $B$  (to be specified later), consider the event  $\mathcal{A}_W = \left\{ \left| x_{W_k,l}^{(j)} \right| \leq \right.$   
1135  $B$  and  $\frac{1}{2(1+\exp(B))} \leq \tilde{n}_{W_k,l}^{(j)} \leq 1 - \frac{1}{2(1+\exp(B))}$  for  $j = 1, \dots, N, k = 1, \dots, K$  and  $l = 1, \dots, L \left. \right\}$ , such that  
1136  $\tilde{\mathbf{n}}_{W_k,l} = \left[ \tilde{n}_{W_k,l}^{(1)}, \tilde{n}_{W_k,l}^{(2)}, \dots, \tilde{n}_{W_k,l}^{(N)} \right]^\top := \frac{1}{W} \sum_{w=1}^W \mathbf{n}_{(k-1)W+w,l}$ . First, we derive convenient forms of the  
1137 maximum likelihood estimators via the Laplace's approximations and asymptotic expansions  
1138 (**Wong, 2001**) through the following lemma:

1139 **Lemma 1.** *Conditioned on event  $\mathcal{A}_W$ , the maximum likelihood estimators of the stimulus kernel  
1140 of the  $j^{\text{th}}$  neuron and the noise covariance between the  $i^{\text{th}}$  and  $j^{\text{th}}$  neurons take the forms:*

$$\begin{aligned} \hat{d}_j &= \tilde{d}_j \left( 1 + \mathcal{O}(\sigma_w^2) \right) \left( 1 + \mathcal{O}\left(\frac{1}{W}\right) \right) \quad \text{and} \\ (\hat{\Sigma}_x)_{i,j} &= (\tilde{\Sigma}_x)_{i,j} \left( 1 + \mathcal{O}(\sigma_w^2) \right) \left( 1 + \mathcal{O}\left(\frac{1}{W}\right) \right), \end{aligned}$$

1141 where

$$\begin{aligned} \tilde{d}_j &= \frac{1}{L \sum_{k=1}^K s_{W_k}^2} \sum_{k,l=1}^{K,L} s_{W_k} \left( \phi^{-1} \left( \tilde{n}_{W_k,l}^{(j)} \right) - \mu_x^{(j)} \right) \quad \text{and} \\ (\tilde{\Sigma}_x)_{i,j} &= \frac{1}{KL} \sum_{k,l=1}^{K,L} \left( \phi^{-1} \left( \tilde{n}_{W_k,l}^{(i)} \right) - \mu_x^{(i)} - s_{W_k} \tilde{d}_i \right) \left( \phi^{-1} \left( \tilde{n}_{W_k,l}^{(j)} \right) - \mu_x^{(j)} - s_{W_k} \tilde{d}_j \right), \end{aligned}$$

1142 with  $\tilde{\mathbf{n}}_{W_k,l} = \left[ \tilde{n}_{W_k,l}^{(1)}, \tilde{n}_{W_k,l}^{(2)}, \dots, \tilde{n}_{W_k,l}^{(N)} \right]^\top := \frac{1}{W} \sum_{w=1}^W \left( \mathbf{y}_{(k-1)W+w,l} - \alpha \mathbf{y}_{(k-1)W+w-1,l} \right)$  and  $\phi^{-1}(z) := \ln(z/(1-z))$ .

*Proof of Lemma 1.* First, maximizing the data likelihood, we derive the estimators:

$$\hat{d}_j = \underset{d_j}{\operatorname{argmax}} p(\mathbf{y}|\Sigma_x, \mathbf{d}) = \frac{\int \left( \frac{1}{L \sum_{k=1}^K s_{W_k}^2} \sum_{k,l=1}^{K,L} s_{W_k} \left( x_{W_{k,l}}^{(j)} - \mu_x^{(j)} \right) \right) p(\mathbf{y}|\mathbf{n})p(\mathbf{n}|\mathbf{x})p(\mathbf{x}|\Sigma_x, \mathbf{d}) d\mathbf{n}d\mathbf{x}}{\int p(\mathbf{y}|\mathbf{n})p(\mathbf{n}|\mathbf{x})p(\mathbf{x}|\Sigma_x, \mathbf{d}) d\mathbf{n}d\mathbf{x}}, \quad (10)$$

and

$$\widehat{(\Sigma_x)}_{i,j} = \underset{(\Sigma_x)_{i,j}}{\operatorname{argmax}} p(\mathbf{y}|\Sigma_x, \mathbf{d}) = \frac{\int \left( \frac{1}{KL} \sum_{k,l=1}^{K,L} \left( x_{W_{k,l}}^{(i)} - \mu_x^{(i)} - s_{W_k} \hat{d}_i \right) \left( x_{W_{k,l}}^{(j)} - \mu_x^{(j)} - s_{W_k} \hat{d}_j \right) \right) p(\mathbf{y}|\mathbf{n})p(\mathbf{n}|\mathbf{x})p(\mathbf{x}|\Sigma_x, \mathbf{d}) d\mathbf{n}d\mathbf{x}}{\int p(\mathbf{y}|\mathbf{n})p(\mathbf{n}|\mathbf{x})p(\mathbf{x}|\Sigma_x, \mathbf{d}) d\mathbf{n}d\mathbf{x}}. \quad (11)$$

where  $W_k = (k-1)W + 1$ . Then, we simplify these integrals based on the saddle point method of asymptotic expansions ([Wong, 2001](#)). To that end, first consider the numerator of [Equation 10](#) denoted by  $I_{\text{num}}^{(1)}$ . First, we evaluate the integration in  $I_{\text{num}}^{(1)}$  with respect to the variable  $\mathbf{n}$ . To that end, note:

$$I_{\text{num}}^{(1)} = \int h_{\text{num}}^{(1)}(\mathbf{n}) \exp(A_1 f_1(\mathbf{n})) d\mathbf{n},$$

where  $h_{\text{num}}^{(1)}(\mathbf{n}) = \frac{1}{\sqrt{(2\pi)^{TNL} \sigma_w^{2TNL}}} \int \left( \frac{1}{L \sum_{k=1}^K s_{W_k}^2} \sum_{k,l=1}^{K,L} s_{W_k} \left( x_{W_{k,l}}^{(j)} - \mu_x^{(j)} \right) \right) p(\mathbf{n}|\mathbf{x})p(\mathbf{x}|\Sigma_x, \mathbf{d}) d\mathbf{x}$ ,  $A_1 = \frac{1}{\sigma_w^2}$ ,  $f_1(\mathbf{n}) = -\frac{1}{2} \sum_{t,l,j} \left( y_{t,l}^{(j)} - \sum_{k=1}^t \alpha^{t-k} n_{t,l}^{(j)} \right)^2$  and  $d\mathbf{n}$  is shorthand notation for the product measure of the discrete random vector  $\mathbf{n}$ . Observing that  $\nabla f_1(\hat{\mathbf{n}}) = \mathbf{0}$  for  $\hat{\mathbf{n}} := \{\hat{\mathbf{n}}_{t,l} = \mathbf{y}_{t,l} - \alpha \mathbf{y}_{t-1,l}\}_{t,l=1}^{T,L}$  using the method of asymptotic expansions,  $I_{\text{num}}^{(1)}$  can be evaluated as:

$$I_{\text{num}}^{(1)} = h_{\text{num}}^{(1)}(\hat{\mathbf{n}}) \times \exp(A_1 f_1(\hat{\mathbf{n}})) \sqrt{\frac{(2\pi)^{TNL}}{-A_1 |H(f_1)|}} \left( 1 + \mathcal{O}\left(\frac{1}{A_1}\right) \right), \quad (12)$$

where the determinant of the Hessian matrix  $|H(f_1)|$ , is a negative function of  $\alpha$ . Note that the covariance of this Gaussian integral  $(-H(f_1))^{-1}$  is a function of  $\alpha \in (0, 1)$ , and hence is bounded. Thus, all higher order error terms in [Equation 12](#) are also bounded, as higher order moments of Gaussian distributions are functions of the covariance.

Next, we simplify the integral  $h_{\text{num}}^{(1)}(\hat{\mathbf{n}})$  in [Equation 12](#) using a similar procedure. We have:

$$h_{\text{num}}^{(1)}(\hat{\mathbf{n}}) = \int r_{\text{num}}^{(1)}(\mathbf{x}) \exp(A_2 f_2(\mathbf{x})) d\mathbf{x}, \quad (13)$$

where  $f_2(\mathbf{x}) = \sum_{k,l,j} \left( \tilde{n}_{W_{k,l}}^{(j)} x_{W_{k,l}}^{(j)} - \log\left(1 + \exp\left(x_{W_{k,l}}^{(j)}\right)\right) \right)$  with  $\tilde{\mathbf{n}}_{W_{k,l}} = \left[ \tilde{n}_{W_{k,l}}^{(1)}, \tilde{n}_{W_{k,l}}^{(2)}, \dots, \tilde{n}_{W_{k,l}}^{(N)} \right]^T := \frac{1}{W} \sum_{w=1}^W \hat{\mathbf{n}}_{(k-1)W+w,l}$ ,  $r_{\text{num}}^{(1)}(\mathbf{x}) = \frac{1}{\sqrt{(2\pi)^{(W+1)KLN} \sigma_w^{2TNL} |\Sigma_x|^{KL}}} \exp\left(-\frac{1}{2} \sum_t (\mathbf{x}_{W_{k,l}} - \mu_x - s_{W_k} \mathbf{d})^\top \Sigma_x^{-1} (\mathbf{x}_{W_{k,l}} - \mu_x - s_{W_k} \mathbf{d})\right) \times \left( \frac{1}{L \sum_{k=1}^K s_{W_k}^2} \sum_{k=1}^K s_{W_k} \left( x_{W_{k,l}}^{(j)} - \mu_x^{(j)} \right) \right)$  and  $A_2 = W$ . Then, we note that the gradient of  $f_2$ ,  $\nabla f_2(\hat{\mathbf{x}}) = \mathbf{0}$  for  $\hat{\mathbf{x}} := \left\{ \hat{x}_{W_{k,l}}^{(j)} = \phi^{-1}\left(\tilde{n}_{W_{k,l}}^{(j)}\right) \right\}_{k,l,j=1}^{K,L,N}$ , where  $\phi^{-1}(z) := \text{logit}(z) = \ln(z/(1-z))$ . Accordingly, by re-applying the saddle point method of asymptotic expansions, we evaluate the integral in [Equation 13](#) as:

$$h_{\text{num}}^{(1)}(\hat{\mathbf{n}}) = r_{\text{num}}^{(1)}(\hat{\mathbf{x}}) \times \exp(A_2 f_2(\hat{\mathbf{x}})) \sqrt{\frac{(2\pi)^{KLN}}{-A_2 |H(f_2(\hat{\mathbf{x}}))|}} \left( 1 + \mathcal{O}\left(\frac{1}{A_2}\right) \right), \quad (14)$$

where the determinant of the Hessian,  $|H(f_2(\hat{\mathbf{x}}))| = -\prod_{k,l,j} \tilde{n}_{W_{k,l}}^{(j)} \left(1 - \tilde{n}_{W_{k,l}}^{(j)}\right) < 0$  when conditioned on event  $\mathcal{A}_W$ . The higher order terms in [Equation 14](#) will be bounded if the covariance of the saddle point approximation  $(-H(f_2(\hat{\mathbf{x}})))^{-1}$  is bounded, which we ensure by conditioning on event  $\mathcal{A}_W$ . This completes the evaluation of  $I_{\text{num}}^{(1)}$ .

Following the same sequence of arguments, we evaluate the denominator of **Equation 10** denoted by  $I_{\text{den}}^{(1)}$ . Accordingly, we derive:

$$I_{\text{den}}^{(1)} = h_{\text{den}}^{(1)}(\hat{\mathbf{n}}) \times \exp(A_1 f_1(\hat{\mathbf{n}})) \sqrt{\frac{(2\pi)^{TLN}}{-A_1 |H(f_1)|}} \left(1 + \mathcal{O}\left(\frac{1}{A_1}\right)\right),$$

$$h_{\text{den}}^{(1)}(\hat{\mathbf{n}}) = r_{\text{den}}^{(1)}(\hat{\mathbf{x}}) \times \exp(A_2 f_2(\hat{\mathbf{x}})) \sqrt{\frac{(2\pi)^{KLN}}{-A_2 |H(f_2(\hat{\mathbf{x}}))|}} \left(1 + \mathcal{O}\left(\frac{1}{A_2}\right)\right), \quad (15)$$

where  $r_{\text{den}}^{(1)}(\mathbf{x}) = \frac{1}{\sqrt{(2\pi)^{(W+1)KLN} \sigma_w^{2TLN} |\Sigma_x|^{KL}}} \exp\left(-\frac{1}{2} \sum_{k,l} (\mathbf{x}_{W_k,l} - \boldsymbol{\mu}_x - s_{W_k} \mathbf{d})^\top \Sigma_x^{-1} (\mathbf{x}_{W_k,l} - \boldsymbol{\mu}_x - s_{W_k} \mathbf{d})\right)$ . Finally, by combining **Equation 12**, **Equation 14** and **Equation 15**, the maximum likelihood estimator in **Equation 10** takes the form:

$$\hat{d}_j = \frac{I_{\text{num}}^{(1)}}{I_{\text{den}}^{(1)}} = \tilde{d}_j \frac{\left(1 + \mathcal{O}\left(\frac{1}{A_1}\right)\right) \left(1 + \mathcal{O}\left(\frac{1}{A_2}\right)\right)}{\left(1 + \mathcal{O}\left(\frac{1}{A_1}\right)\right) \left(1 + \mathcal{O}\left(\frac{1}{A_2}\right)\right)} = \tilde{d}_j \left(1 + \mathcal{O}(\sigma_w^2)\right) \left(1 + \mathcal{O}\left(\frac{1}{W}\right)\right).$$

Further, following the same sequence of reasoning, simplifying the numerator ( $I_{\text{num}}^{(2)}$ ) and denominator ( $I_{\text{den}}^{(2)}$ ) of **Equation 11** yields:

$$(\hat{\boldsymbol{\Sigma}}_x)_{i,j} = \frac{I_{\text{num}}^{(2)}}{I_{\text{den}}^{(2)}} = \frac{\tilde{(\boldsymbol{\Sigma}}_x)_{i,j} \left(1 + \mathcal{O}\left(\frac{1}{A_1}\right)\right) \left(1 + \mathcal{O}\left(\frac{1}{A_2}\right)\right)}{\tilde{(\boldsymbol{\Sigma}}_x)_{i,j} \left(1 + \mathcal{O}\left(\frac{1}{A_1}\right)\right) \left(1 + \mathcal{O}\left(\frac{1}{A_2}\right)\right)} = \tilde{(\boldsymbol{\Sigma}}_x)_{i,j} \left(1 + \mathcal{O}(\sigma_w^2)\right) \left(1 + \mathcal{O}\left(\frac{1}{W}\right)\right).$$

This concludes the proof of Lemma 1.  $\square$

Given that  $\phi^{-1}(z)$  is unbounded for  $z = 0$  or  $z = 1$ , we consider another truncation:  $\phi_{B'}^{-1}(z) := \min\{\max\{\phi^{-1}(z), -B'\}, B'\}$ , where  $B' = 2 \log(2 \exp(B) + 1)$ . This choice of  $B'$  guarantees that over  $\mathcal{A}_W$ ,  $\left|\phi_{B'}^{-1}\left(\frac{\tilde{n}_{W_k,l}^{(j)}}{n_{W_k,l}^{(j)}}\right)\right| < B'$  for all  $j = 1, \dots, N$ ,  $k = 1, \dots, K$  and  $l = 1, \dots, L$ ; and thus  $\phi_{B'}^{-1}\left(\frac{\tilde{n}_{W_k,l}^{(j)}}{n_{W_k,l}^{(j)}}\right) = \phi^{-1}\left(\frac{\tilde{n}_{W_k,l}^{(j)}}{n_{W_k,l}^{(j)}}\right)$  on  $\mathcal{A}_W$ .

From Lemma 1, the bias and variance of the maximum likelihood estimators,  $\hat{d}_j$  and  $(\hat{\boldsymbol{\Sigma}}_x)_{i,j}$  are upper-bounded, if those of  $\tilde{d}_j$  and  $(\tilde{\boldsymbol{\Sigma}}_x)_{i,j}$  are bounded:

$$\left|\text{bias}\left(\hat{d}_j\right)\right| \leq \left|\text{bias}\left(\tilde{d}_j\right)\right| + \zeta_j, \quad \text{Var}\left(\hat{d}_j\right) \leq \text{Var}\left(\tilde{d}_j\right) + \tilde{\zeta}_j, \quad (16)$$

and

$$\left|\text{bias}\left((\hat{\boldsymbol{\Sigma}}_x)_{i,j}\right)\right| \leq \left|\text{bias}\left((\tilde{\boldsymbol{\Sigma}}_x)_{i,j}\right)\right| + v_{i,j}, \quad \text{Var}\left((\hat{\boldsymbol{\Sigma}}_x)_{i,j}\right) \leq \text{Var}\left((\tilde{\boldsymbol{\Sigma}}_x)_{i,j}\right) + \tilde{v}_{i,j}, \quad (17)$$

where  $\zeta_j$ ,  $\tilde{\zeta}_j$ ,  $v_{i,j}$  and  $\tilde{v}_{i,j}$  represent terms that are  $\mathcal{O}(\sigma_w^2)$  or  $\mathcal{O}\left(\frac{1}{W}\right)$ . Thus, we seek to derive the performance bounds of  $\tilde{d}_j$  and  $(\tilde{\boldsymbol{\Sigma}}_x)_{i,j}$ .

**Bounding the bias of  $\hat{d}_j$**

Let us first consider  $\tilde{d}_j$ . Note that:

$$\begin{aligned} \left|\text{bias}\left(\tilde{d}_j\right)\right| &:= \left|\mathbb{E}\left[\tilde{d}_j\right] - d_j\right| \\ &\stackrel{(a)}{=} \left|\mathbb{E}\left[\tilde{d}_j - (d_{\text{Oracle}})_j\right]\right| \\ &\stackrel{(b)}{\leq} \frac{1}{L \sum_{k=1}^K s_{W_k}^2} \sum_{k,l=1}^{K,L} |s_{W_k}| \left|\mathbb{E}\left[\left|\phi_{B'}^{-1}\left(\frac{\tilde{n}_{W_k,l}^{(j)}}{n_{W_k,l}^{(j)}}\right) - x_{W_k,l}^{(j)}\right|\right]\right| \end{aligned} \quad (18)$$

1231

1232

1233

1234

1235

1236

1237

1238

1239

1240

1241

1242

1243

1244

1245

1246

1247

1248

1249

1250

1251

1252

1253

1254

1255

1256

1257

1258

1259

1260

1261

1262

1263

1264

1265

where (a) holds since the Oracle estimator,  $(d_{\text{Oracle}})_j = \frac{1}{L \sum_{k=1}^K \sum_{l=1}^L s_{W_k} (x_{W_k,l}^{(j)} - \mu_x^{(j)})}$  (i.e., observing  $\mathbf{x}_{:,l}$  directly) is unbiased and (b) follows through the application of Jensen's inequality and triangle inequality. To simplify this bound, the triangle inequality yields:

$$\mathbb{E} \left[ \left| \phi_{B'}^{-1}(\tilde{n}_{W_k,l}^{(j)}) - x_{W_k,l}^{(j)} \right| \right] \leq \mathbb{E} \left[ \left| \phi_{B'}^{-1}(\tilde{n}_{W_k,l}^{(j)}) - \phi_{B'}^{-1}(\bar{n}_{W_k,l}^{(j)}) \right| \right] + \mathbb{E} \left[ \left| \phi_{B'}^{-1}(\bar{n}_{W_k,l}^{(j)}) - x_{W_k,l}^{(j)} \right| \right]. \quad (19)$$

Then, to bound each of these terms, we establish a piece-wise linear Lipschitz-type bound on  $\phi_{B'}^{-1}(z)$ . First, consider the first term  $\mathbb{E} \left[ \left| \phi_{B'}^{-1}(\tilde{n}_{W_k,l}^{(j)}) - \phi_{B'}^{-1}(\bar{n}_{W_k,l}^{(j)}) \right| \right]$ . We seek to upper-bound this expectation by bounding  $\left| \phi_{B'}^{-1}(\tilde{n}_{W_k,l}^{(j)}) - \phi_{B'}^{-1}(\bar{n}_{W_k,l}^{(j)}) \right|$  via the following technical lemma:

**Lemma 2.** *Conditioned on event  $\mathcal{A}_{W'}$ , the following bound holds for all  $j = 1, \dots, N$ ,  $k = 1, \dots, K$  and  $l = 1, \dots, L$ :*

$$\varepsilon(\tilde{n}_{W_k,l}^{(j)}, \bar{n}_{W_k,l}^{(j)}) := \left| \phi_{B'}^{-1}(\tilde{n}_{W_k,l}^{(j)}) - \phi_{B'}^{-1}(\bar{n}_{W_k,l}^{(j)}) \right| \leq g(B) \left| \tilde{n}_{W_k,l}^{(j)} - \bar{n}_{W_k,l}^{(j)} \right|,$$

where

$$g(B) = \max \left\{ 4(1 + \exp(B))^2, 4 \exp(-B) \log(2 \exp(B) + 1) (1 + (2 \exp(B) + 1)^2) \right\}.$$

*Proof of Lemma 2.* First, consider the case  $\bar{n}_{W_k,l}^{(j)} \leq 0.5$ . We bound the function  $\varepsilon(\tilde{n}_{W_k,l}^{(j)}, \bar{n}_{W_k,l}^{(j)})$  in a piece-wise fashion as follows. Note that  $\phi_{B'}^{-1}(\tilde{n}_{W_k,l}^{(j)})$  is convex for  $\tilde{n}_{W_k,l}^{(j)} \geq 0.5$  and concave for  $\tilde{n}_{W_k,l}^{(j)} \leq 0.5$ . Thus, it immediately follows that for  $\bar{n}_{W_k,l}^{(j)} \leq \tilde{n}_{W_k,l}^{(j)}$ ,  $\varepsilon(\tilde{n}_{W_k,l}^{(j)}, \bar{n}_{W_k,l}^{(j)})$  is convex and hence:

$$\varepsilon(\tilde{n}_{W_k,l}^{(j)}, \bar{n}_{W_k,l}^{(j)}) \leq \frac{B' + \phi_{B'}^{-1}(\bar{n}_{W_k,l}^{(j)})}{\left| \bar{n}_{W_k,l}^{(j)} - \frac{1}{1 + \exp(B')} \right|} \left( \tilde{n}_{W_k,l}^{(j)} - \bar{n}_{W_k,l}^{(j)} \right). \quad (20)$$

Furthermore, for  $\bar{n}_{W_k,l}^{(j)} \leq \tilde{n}_{W_k,l}^{(j)} \leq 0.5$ ,  $\varepsilon(\tilde{n}_{W_k,l}^{(j)}, \bar{n}_{W_k,l}^{(j)})$  is concave, and hence is bounded by the tangent at  $\bar{n}_{W_k,l}^{(j)}$ :

$$\varepsilon(\tilde{n}_{W_k,l}^{(j)}, \bar{n}_{W_k,l}^{(j)}) \leq \frac{1}{\bar{n}_{W_k,l}^{(j)} (1 - \bar{n}_{W_k,l}^{(j)})} \left( \tilde{n}_{W_k,l}^{(j)} - \bar{n}_{W_k,l}^{(j)} \right). \quad (21)$$

Finally, for the case of  $\bar{n}_{W_k,l}^{(j)} \geq 0.5$ , consider the line,

$$h(\tilde{n}_{W_k,l}^{(j)}, \bar{n}_{W_k,l}^{(j)}) := \frac{B' - \phi_{B'}^{-1}(\bar{n}_{W_k,l}^{(j)})}{\left| \frac{1}{1 + \exp(-B')} - \bar{n}_{W_k,l}^{(j)} \right|} \left( \tilde{n}_{W_k,l}^{(j)} - \bar{n}_{W_k,l}^{(j)} \right). \quad (22)$$

From the convexity of  $\varepsilon(\tilde{n}_{W_k,l}^{(j)}, \bar{n}_{W_k,l}^{(j)})$ ,  $h(\tilde{n}_{W_k,l}^{(j)}, \bar{n}_{W_k,l}^{(j)})$  upper bounds  $\varepsilon(\tilde{n}_{W_k,l}^{(j)}, \bar{n}_{W_k,l}^{(j)})$  for  $\bar{n}_{W_k,l}^{(j)} \geq 0.5$ , since  $h(0.5, \bar{n}_{W_k,l}^{(j)}) \geq \varepsilon(0.5, \bar{n}_{W_k,l}^{(j)})$  for  $\bar{n}_{W_k,l}^{(j)} \leq 0.5$ . Combining the piece-wise bounds in **Equation 20**, **Equation 21** and **Equation 22**, we conclude that for  $\bar{n}_{W_k,l}^{(j)} \leq 0.5$ :

$$\varepsilon(\tilde{n}_{W_k,l}^{(j)}, \bar{n}_{W_k,l}^{(j)}) \leq \tilde{g}(\bar{n}_{W_k,l}^{(j)}, B') \left| \tilde{n}_{W_k,l}^{(j)} - \bar{n}_{W_k,l}^{(j)} \right|, \quad (23)$$

1272  
1273  
1274  
1275  
1276  
1277  
1278  
1279  
1280  
1281  
1282  
1283  
1284  
1285  
1286  
1287  
1288  
1289  
1290  
1291  
1292  
1293  
1294  
1295  
1296  
1297  
1298  
1299  
1300  
1301  
1302  
1303  
1304  
1305  
1306  
1307  
1308  
1309  
1310

where

$$\tilde{g}\left(\bar{n}_{W_{k,l}}^{(j)}, B'\right) = \max \left\{ \frac{1}{\bar{n}_{W_{k,l}}^{(j)}(1 - \bar{n}_{W_{k,l}}^{(j)})}, \frac{\left| B' + \phi_{B'}^{-1}\left(\bar{n}_{W_{k,l}}^{(j)}\right) \right|}{\left| \bar{n}_{W_{k,l}}^{(j)} - \frac{1}{1 + \exp(B')} \right|}, \frac{\left| B' - \phi_{B'}^{-1}\left(\bar{n}_{W_{k,l}}^{(j)}\right) \right|}{\left| \frac{1}{1 + \exp(-B')} - \bar{n}_{W_{k,l}}^{(j)} \right|} \right\}.$$

Due to the symmetry of  $\varepsilon\left(\bar{n}_{W_{k,l}}^{(j)}, \bar{n}_{W_{k,l}}^{(j)}\right)$ , the same bound in **Equation 23** can be established for  $\bar{n}_{W_{k,l}}^{(j)} > 0.5$  as well.

Then, using  $\left| \phi_{B'}^{-1}\left(\bar{n}_{W_{k,l}}^{(j)}\right) \right| \leq B'$  and conditioning on event  $\mathcal{A}_W$ , we simplify this bound as:

$$\tilde{g}\left(\bar{n}_{W_{k,l}}^{(j)}, B'\right) \leq \max \left\{ 4(1 + \exp(B))^2, \frac{4B'(1 + \exp(B'))(1 + \exp(B))}{\exp(B') - (2\exp(B) + 1)} \right\}.$$

Finally, based on the fact that  $B' = 2 \log(2\exp(B) + 1)$ , the latter is further upper bounded as:

$$\tilde{g}\left(\bar{n}_{W_{k,l}}^{(j)}, B'\right) \leq g(B),$$

where

$$g(B) = \max \left\{ 4(1 + \exp(B))^2, 4\exp(-B) \log(2\exp(B) + 1)(1 + (2\exp(B) + 1)^2) \right\}.$$

This concludes the proof of Lemma 2. □

Following Lemma 2, by conditioning on the event  $\mathcal{A}_W$  we have:

$$\mathbb{E}_{\mathcal{A}_W} \left[ \left| \phi_{B'}^{-1}\left(\tilde{n}_{W_{k,l}}^{(j)}\right) - \phi_{B'}^{-1}\left(\bar{n}_{W_{k,l}}^{(j)}\right) \right| \right] \leq g(B) \mathbb{E}_{\mathcal{A}_W} \left[ \left| \tilde{n}_{W_{k,l}}^{(j)} - \bar{n}_{W_{k,l}}^{(j)} \right| \right]. \quad (24)$$

Then, we note that:

$$\begin{aligned} \mathbb{E} \left[ \left| \tilde{n}_{W_{k,l}}^{(j)} - \bar{n}_{W_{k,l}}^{(j)} \right| \right] &\stackrel{(c)}{\leq} \sqrt{\mathbb{E} \left[ \left| \tilde{n}_{W_{k,l}}^{(j)} - \bar{n}_{W_{k,l}}^{(j)} \right|^2 \right]} \\ &\stackrel{(d)}{=} \frac{\sigma_w \sqrt{1 + \alpha^2}}{\sqrt{W}}, \end{aligned} \quad (25)$$

where in (c) we have used the Cauchy-Schwarz inequality, and in (d) we have used the fact that the observation noise across the  $W$  time instances is i.i.d. and white. From the bounds in **Equation 24** and **Equation 25**, we conclude that the first expectation in **Equation 19**, conditioned on event  $\mathcal{A}_W$  is bounded as:

$$\begin{aligned} \mathbb{E}_{\mathcal{A}_W} \left[ \left| \phi_{B'}^{-1}\left(\tilde{n}_{W_{k,l}}^{(j)}\right) - \phi_{B'}^{-1}\left(\bar{n}_{W_{k,l}}^{(j)}\right) \right| \right] &\leq g(B) \mathbb{E}_{\mathcal{A}_W} \left[ \left| \tilde{n}_{W_{k,l}}^{(j)} - \bar{n}_{W_{k,l}}^{(j)} \right| \right] \\ &\leq g(B) \frac{\sigma_w \sqrt{1 + \alpha^2}}{\sqrt{W} \mathbb{P}(\mathcal{A}_W)}. \end{aligned} \quad (26)$$

The foregoing sequence of reasoning similarly follows for  $\mathbb{E} \left[ \left| \phi_{B'}^{-1}\left(\bar{n}_{W_{k,l}}^{(j)}\right) - x_{W_{k,l}}^{(j)} \right| \right]$ , since  $\frac{1}{1 + \exp(B)} \leq \phi\left(x_{W_{k,l}}^{(j)}\right) \leq 1 - \frac{1}{1 + \exp(B)}$  for  $k = 1, \dots, K, l = 1, \dots, L$  and  $j = 1, \dots, N$  (as a consequence of  $|x_{W_{k,l}}^{(j)}| < B$  for  $k = 1, \dots, K, l = 1, \dots, L$  and  $j = 1, \dots, N$ , conditioned on  $\mathcal{A}_W$ ). Accordingly,

we derive the upper bound on the second term in **Equation 19**, conditioned on event  $\mathcal{A}_W$ :

$$\begin{aligned}
 \mathbb{E}_{\mathcal{A}_W} \left[ \left| \phi_{B'}^{-1} \left( \tilde{n}_{W_{k,l}}^{(j)} \right) - x_{W_{k,l}}^{(j)} \right| \right] &\leq g(B) \mathbb{E}_{\mathcal{A}_W} \left[ \left| \tilde{n}_{W_{k,l}}^{(j)} - \phi \left( x_{W_{k,l}}^{(j)} \right) \right| \right] \\
 &\stackrel{(e)}{\leq} \frac{g(B)}{W \mathbb{P}(\mathcal{A}_W)} \sqrt{\mathbb{E} \left[ \left( \sum_{w=1}^W n_{(k-1)W+w,l}^{(j)} - W \phi \left( x_{W_{k,l}}^{(j)} \right) \right)^2 \right]} \\
 &\stackrel{(f)}{=} \frac{g(B)}{W \mathbb{P}(\mathcal{A}_W)} \sqrt{\mathbb{E} \left[ W \phi \left( x_{W_{k,l}}^{(j)} \right) \left( 1 - \phi \left( x_{W_{k,l}}^{(j)} \right) \right) \right]} \\
 &\stackrel{(g)}{\leq} \frac{g(B)}{2\sqrt{W} \mathbb{P}(\mathcal{A}_W)}, \tag{27}
 \end{aligned}$$

where (e) follows from the application of Jensen's inequality, (f) follows from the formula for the variance of a Binomial random variable, and (g) follows from the inequality  $\phi \left( x_{W_{k,l}}^{(j)} \right) \times \left( 1 - \phi \left( x_{W_{k,l}}^{(j)} \right) \right) \leq 1/4$ , for  $\phi \left( x_{W_{k,l}}^{(j)} \right) \in [0, 1]$ . Combining the results in **Equation 26** and **Equation 27**, the overall expectation in **Equation 19**, conditioned on the event  $\mathcal{A}_W$  is upper-bounded by:

$$\mathbb{E}_{\mathcal{A}_W} \left[ \left| \phi_{B'}^{-1} \left( \tilde{n}_{W_{k,l}}^{(j)} \right) - x_{W_{k,l}}^{(j)} \right| \right] \leq \frac{2g(B)}{\sqrt{W}} \left( \sigma_w \sqrt{1 + \alpha^2} + \frac{1}{2} \right), \tag{28}$$

where we have lower bounded the probability of the event  $\mathcal{A}_W$  by  $1/2$  (that is,  $\mathbb{P}(\mathcal{A}_W) > 1/2$ ). Thus, from **Equation 18** and **Equation 28** we derive:

$$\begin{aligned}
 \left| \text{bias}_{\mathcal{A}_W} \left( \tilde{d}_j \right) \right| &\leq \frac{2g(B)}{\sqrt{W}} \left( \sigma_w \sqrt{1 + \alpha^2} + \frac{1}{2} \right) \frac{\sum_{k,l=1}^{K,L} |s_{W_k}|}{L \sum_{k=1}^K s_{W_k}^2} \\
 &\stackrel{(h)}{\leq} \frac{2g(B)}{\sigma_s \sqrt{W}} \left( \sigma_w \sqrt{1 + \alpha^2} + \frac{1}{2} \right),
 \end{aligned}$$

where in (h) we have used the Cauchy-Schwarz inequality  $\sum_{k=1}^K |s_{W_k}| \leq \sqrt{K} \sqrt{\sum_{k=1}^K s_{W_k}^2}$  while defining  $\sigma_s^2 := \frac{1}{K} \sum_{k=1}^K s_{W_k}^2$ .

Then, for  $B \geq 2.5$ , we have  $g(B) = 4(1 + \exp(B))^2$  and  $B' = 2 \log(2 \exp(B) + 1) \leq 3B$ . Let  $B := \sigma_m \sqrt{8q \log W}$  for some  $q > \frac{1}{64}$ . Further, for some  $\epsilon < 1/2$ , suppose that:

$$\log W \geq \max \left\{ \frac{\log(8KLN/\eta)}{q}, \frac{32\sigma_m^2 q}{\epsilon^2}, \frac{2 \log(64q)}{1 - 2\epsilon}, \frac{\max \left\{ 6.25, 4 \left( \|\mu_x\|_\infty + \max_{k,j} \{ |s_{W_k} d_j| \} \right)^2 \right\}}{8q\sigma_m^2}, \log 2 \right\}. \tag{29}$$

Under these conditions,

$$\begin{aligned}
 g(B) &\leq 4 \left( 1 + \exp(\sigma_m \sqrt{8q \log W}) \right)^2 \\
 &\stackrel{(i)}{\leq} 16 \exp \left( 2\sigma_m \sqrt{8q \log W} \right) \\
 &\leq 16W^\epsilon, \tag{30}
 \end{aligned}$$

where in (i) we have used the fact that  $e^x \geq 1$  for  $x \geq 0$ . Thus, under the conditions in **Equation 29**, we have:

$$\left| \text{bias}_{\mathcal{A}_W} \left( \tilde{d}_j \right) \right| \leq \frac{32}{\sigma_s \sqrt{W^{1-2\epsilon}}} \left( \sigma_w \sqrt{1 + \alpha^2} + \frac{1}{2} \right). \tag{31}$$

1344

1345

1346

1347

1348

1349

1350

1351

1352

1353

1354

1355

1356

1357

1358

1359

1360

1361

1362

1363

1364

1365

1366

Finally, from **Equation 16** and **Equation 31**, we conclude that:

$$\left| \text{bias}_{\mathcal{A}_W}(\hat{d}_j) \right| \leq \frac{1}{\sqrt{W^{1-2\epsilon}}} C_1 \left( 2\sigma_w \sqrt{1 + \alpha^2} + 1 \right) + \mathcal{O}(\sigma_w^2) + \mathcal{O}\left(\frac{1}{W}\right),$$

where  $C_1 := \frac{16}{\sigma_s}$ .

Bounding the variance of  $\hat{d}_j$

Next, we prove the upper bound on the variance of the maximum likelihood estimator,  $\hat{d}_j$ . To that end, we upper-bound the variance of  $\tilde{d}_j$ . First, using the Cauchy-Schwarz inequality, we have:

$$\text{Var}(\tilde{d}_j) := \mathbb{E} \left[ \left[ \tilde{d}_j - \mathbb{E}[\tilde{d}_j] \right]^2 \right] \leq \left\{ \sqrt{\mathbb{E} \left[ \left[ \tilde{d}_j - (d_{\text{Oracle}})_j \right]^2 \right]} + \sqrt{\text{Var} \left( (d_{\text{Oracle}})_j \right)} \right\}^2. \quad (32)$$

Then, we upper-bound the conditional second moment of  $\left| \tilde{d}_j - (d_{\text{Oracle}})_j \right|$  using the same techniques as we used in bounding the first moment. Accordingly, we get:

$$\begin{aligned} \mathbb{E}_{\mathcal{A}_W} \left[ \left[ \tilde{d}_j - (d_{\text{Oracle}})_j \right]^2 \right] &= \frac{1}{\left( L \sum_{k=1}^K s_{W_k}^2 \right)^2} \mathbb{E}_{\mathcal{A}_W} \left[ \left[ \sum_{k,l=1}^{K,L} s_{W_k} \left( \phi_{B'}^{-1}(\tilde{n}_{W_k,l}^{(j)}) - x_{W_k,l}^{(j)} \right) \right]^2 \right] \\ &\stackrel{(k)}{\leq} \frac{1}{\left( L \sum_{k=1}^K s_{W_k}^2 \right)^2} \left\{ \sum_{k,l=1}^{K,L} |s_{W_k}| \sqrt{\mathbb{E}_{\mathcal{A}_W} \left[ \left[ \phi_{B'}^{-1}(\tilde{n}_{W_k,l}^{(j)}) - x_{W_k,l}^{(j)} \right]^2 \right]} \right\}^2 \\ &\stackrel{(l)}{\leq} \left\{ \frac{\sqrt{2}g(B)}{\sigma_s \sqrt{W}} \left( \sigma_w \sqrt{1 + \alpha^2} + \frac{1}{2} \right) \right\}^2 \end{aligned} \quad (33)$$

where in (k) we have used the Cauchy-Schwarz inequality and (l) follows from

$\mathbb{E}_{\mathcal{A}_W} \left[ \left[ \phi_{B'}^{-1}(\tilde{n}_{W_k,l}^{(j)}) - x_{W_k,l}^{(j)} \right]^2 \right] \leq \frac{2(g(B))^2}{W} \left( \sigma_w \sqrt{1 + \alpha^2} + \frac{1}{2} \right)^2$ , which can be proven by the same techniques as before.

Next, we note that the variance of the Oracle estimator  $(d_{\text{Oracle}})_j$ :

$$\begin{aligned} \text{Var} \left( (d_{\text{Oracle}})_j \right) &= \frac{1}{\left( L \sum_{k=1}^K s_{W_k}^2 \right)^2} \sum_{k,l=1}^{K,L} s_{W_k}^2 \text{Var} \left( \left( x_{W_k,l}^{(j)} - \mu_x^{(j)} \right) \right) \\ &= \frac{(\Sigma_x)_{j,j}}{L \sum_{k=1}^K s_{W_k}^2} = \frac{(\Sigma_x)_{j,j}}{LK\sigma_s^2} \end{aligned} \quad (34)$$

Combining **Equation 32**, **Equation 33** and **Equation 34**, we can upper-bound the conditional variance of  $\tilde{d}_j$  as: following **Equation 32**:

$$\sqrt{\text{Var}_{\mathcal{A}_W}(\tilde{d}_j)} \leq \sqrt{\frac{(\Sigma_x)_{j,j}}{KL\sigma_s^2(1-\eta)}} + \frac{\sqrt{2}g(B)}{\sigma_s \sqrt{W}} \left( \sigma_w \sqrt{1 + \alpha^2} + \frac{1}{2} \right)$$

Then, following **Equation 16**, under the conditions for  $W$  in **Equation 29**, we conclude the proof of the conditional variance of  $\hat{d}_j$ :

$$\sqrt{\text{Var}_{\mathcal{A}_W}(\hat{d}_j)} \leq \sqrt{\frac{(\Sigma_x)_{j,j}}{KL\sigma_s^2(1-\eta)}} + \frac{1}{\sqrt{W^{1-2\epsilon}}} C_2 \left( 2\sigma_w \sqrt{1 + \alpha^2} + 1 \right) + \mathcal{O}(\sigma_w^2) + \mathcal{O}\left(\frac{1}{W}\right), \quad (35)$$



1376

1378

1379

1380

1381

1382

1383

1384

1385

1386

1387

1388

1389

1390

1391

1392

1393

1394

1395

1396

1397

1398

1399

1400

1401

1402

1403

1404

1405

1406

1407

1408

1409

1410

1411

1412

1413

1414

1415

1416

1417

1418

1419

1420

1421

1422

1423

1424

1425

1426

1427

1428

1429

1430

1431

1432

1433

1434

1435

1436

1437

where  $C_2 := \frac{8\sqrt{2}}{\sigma_s}$ .

Bounding the bias of  $(\widehat{\Sigma}_x)_{i,j}$

Next, following the foregoing techniques, we upper-bound the bias and variance of the noise covariance estimator  $(\widehat{\Sigma}_x)_{i,j}$ . To that end, we first note:

$$\begin{aligned} \left| \text{bias} \left( (\widehat{\Sigma}_x)_{i,j} \right) \right| &:= \left| \mathbb{E} \left[ (\widehat{\Sigma}_x)_{i,j} \right] - (\Sigma_x)_{i,j} \right| \\ &\stackrel{(m)}{\leq} \left| \mathbb{E} \left[ (\widetilde{\Sigma}_x)_{i,j} - (\Sigma_{\text{Oracle}})_{i,j} \right] \right| + \left| \text{bias} \left( (\Sigma_{\text{Oracle}})_{i,j} \right) \right| \end{aligned} \quad (36)$$

where (m) follows from the triangle inequality, with the Oracle noise covariance estimator (i.e., observing  $\mathbf{x}_{t,l}$  directly), being defined as:  $(\Sigma_{\text{Oracle}})_{i,j} = \frac{1}{KL} \sum_{k,l=1}^{K,L} (x_{W_{k,l}}^{(i)} - \mu_x^{(i)} - s_{W_k}(d_{\text{Oracle}})_i) \times (x_{W_{k,l}}^{(j)} - \mu_x^{(j)} - s_{W_k}(d_{\text{Oracle}})_j)$ . Then, to simplify the first term in **Equation 36**, we use similar techniques as before. Accordingly,

$$\begin{aligned} &\left| \mathbb{E} \left[ (\widetilde{\Sigma}_x)_{i,j} - (\Sigma_{\text{Oracle}})_{i,j} \right] \right| \\ &= \left| \mathbb{E} \left[ \frac{1}{KL} \sum_{k,l=1}^{K,L} (\phi_{B'}^{-1}(\widetilde{n}_{W_{k,l}}^{(i)}) - \mu_x^{(i)} - s_{W_k} \widetilde{d}_i) (\phi_{B'}^{-1}(\widetilde{n}_{W_{k,l}}^{(j)}) - \mu_x^{(j)} - s_{W_k} \widetilde{d}_j) - \frac{1}{T} \sum_{t=1}^T (x_{W_{k,l}}^{(i)} - \mu_x^{(i)} - s_{W_k}(d_{\text{Oracle}})_i) (x_{W_{k,l}}^{(j)} - \mu_x^{(j)} - s_{W_k}(d_{\text{Oracle}})_j) \right] \right| \\ &\stackrel{(n)}{\leq} \frac{1}{KL} \sum_{k,l=1}^{K,L} \mathbb{E} \left[ \left| (\phi_{B'}^{-1}(\widetilde{n}_{W_{k,l}}^{(i)}) - \mu_x^{(i)}) (\phi_{B'}^{-1}(\widetilde{n}_{W_{k,l}}^{(j)}) - \mu_x^{(j)}) - (x_{W_{k,l}}^{(i)} - \mu_x^{(i)}) (x_{W_{k,l}}^{(j)} - \mu_x^{(j)}) \right| \right] \\ &+ \frac{1}{KL^2 \sum_{k=1}^K s_{W_k}^2} \sum_{k,l=1}^{K,L} \mathbb{E} \left[ \sum_{k',l'=1}^{K,L} s_{W_{k'}} (\phi_{B'}^{-1}(\widetilde{n}_{W_{k',l'}}^{(i)}) - \mu_x^{(i)}) - \sum_{k',l'=1}^{K,L} s_{W_{k'}} (x_{W_{k',l'}}^{(i)} - \mu_x^{(i)}) \sum_{k',l'=1}^{K,L} s_{W_{k'}} (x_{W_{k',l'}}^{(j)} - \mu_x^{(j)}) \right], \end{aligned} \quad (37)$$

where (n) follows through the application of Jensen's inequality and triangle inequality. Next, we have:

$$\begin{aligned} &\mathbb{E}_{\mathcal{A}_W} \left[ \left| (\phi_{B'}^{-1}(\widetilde{n}_{W_{k,l}}^{(i)}) - \mu_x^{(i)}) (\phi_{B'}^{-1}(\widetilde{n}_{W_{k,l}}^{(j)}) - \mu_x^{(j)}) - (x_{W_{k,l}}^{(i)} - \mu_x^{(i)}) (x_{W_{k,l}}^{(j)} - \mu_x^{(j)}) \right| \right] \\ &\leq \mathbb{E}_{\mathcal{A}_W} \left[ \left| \phi_{B'}^{-1}(\widetilde{n}_{W_{k,l}}^{(i)}) \phi_{B'}^{-1}(\widetilde{n}_{W_{k,l}}^{(j)}) - x_{W_{k,l}}^{(i)} x_{W_{k,l}}^{(j)} \right| \right] + \mu_x^{(i)} \mathbb{E}_{\mathcal{A}_W} \left[ \left| \phi_{B'}^{-1}(\widetilde{n}_{W_{k,l}}^{(i)}) - x_{W_{k,l}}^{(i)} \right| \right] + \mu_x^{(j)} \mathbb{E}_{\mathcal{A}_W} \left[ \left| \phi_{B'}^{-1}(\widetilde{n}_{W_{k,l}}^{(j)}) - x_{W_{k,l}}^{(j)} \right| \right] \\ &\leq \mathbb{E}_{\mathcal{A}_W} \left[ \left| \phi_{B'}^{-1}(\widetilde{n}_{W_{k,l}}^{(i)}) \phi_{B'}^{-1}(\widetilde{n}_{W_{k,l}}^{(j)}) - \phi_{B'}^{-1}(\widetilde{n}_{W_{k,l}}^{(i)}) \phi_{B'}^{-1}(\widetilde{n}_{W_{k,l}}^{(j)}) \right| \right] + \mathbb{E}_{\mathcal{A}_W} \left[ \left| \phi_{B'}^{-1}(\widetilde{n}_{W_{k,l}}^{(i)}) \phi_{B'}^{-1}(\widetilde{n}_{W_{k,l}}^{(j)}) - x_{W_{k,l}}^{(i)} x_{W_{k,l}}^{(j)} \right| \right] \\ &\quad + 2\mu_m \mathbb{E}_{\mathcal{A}_W} \left[ \left| \phi_{B'}^{-1}(\widetilde{n}_{W_{k,l}}^{(j)}) - x_{W_{k,l}}^{(j)} \right| \right] \\ &\leq 2g(B) \frac{\sigma_w \sqrt{1+\alpha^2}}{\sqrt{W}} \left( g(B) \frac{\sigma_w \sqrt{1+\alpha^2}}{\sqrt{W}} + 4 \log(2 \exp(B) + 1) \right) + \frac{2g(B)}{\sqrt{W}} \left\{ \frac{g(B)}{4\sqrt{W}} + B \right\} \\ &\quad + \frac{4\mu_m g(B)}{\sqrt{W}} \left( \sigma_w \sqrt{1+\alpha^2} + \frac{1}{2} \right), \end{aligned} \quad (38)$$

where  $\mu_m = \|\mu_x\|_\infty$  and we have used  $B' = 2 \log(2 \exp(B) + 1)$ . Similarly, the second term in **Equation 37** can be bounded as:

$$\begin{aligned}
 & \mathbb{E}_{\mathcal{A}_W} \left[ \left| \sum_{k,l=1}^{K,L} s_{W_k} \left( \phi_{B'}^{-1}(\tilde{n}_{W_k,l}^{(i)}) - \mu_x^{(i)} \right) \sum_{k',l'=1}^{K,L} s_{W_{k'}} \left( \phi_{B'}^{-1}(\tilde{n}_{W_{k'},l'}^{(i)}) - \mu_x^{(i)} \right) - \sum_{k,l=1}^{K,L} s_{W_k} \left( x_{W_k,l}^{(i)} - \mu_x^{(i)} \right) \sum_{k',l'=1}^{K,L} s_{W_{k'}} \left( x_{W_{k'},l'}^{(i)} - \mu_x^{(i)} \right) \right| \right] \\
 & \leq \sum_{k,k',l,l'=1}^{K,K,L,L} |s_{W_k} s_{W_{k'}}| \mathbb{E}_{\mathcal{A}_W} \left[ \left| \phi_{B'}^{-1}(\tilde{n}_{W_k,l}^{(i)}) \phi_{B'}^{-1}(\tilde{n}_{W_{k'},l'}^{(j)}) - x_{W_k,l}^{(i)} x_{W_{k'},l'}^{(j)} \right| \right] \\
 & \quad + \mu_x^{(i)} \sum_{k,k',l,l'=1}^{K,K,L,L} |s_{W_k} s_{W_{k'}}| \mathbb{E}_{\mathcal{A}_W} \left[ \left| \phi_{B'}^{-1}(\tilde{n}_{W_{k'},l'}^{(j)}) - x_{W_{k'},l'}^{(j)} \right| \right] \\
 & \quad + \mu_x^{(j)} \sum_{k,k',l,l'=1}^{K,K,L,L} |s_{W_k} s_{W_{k'}}| \mathbb{E}_{\mathcal{A}_W} \left[ \left| \phi_{B'}^{-1}(\tilde{n}_{W_k,l}^{(i)}) - x_{W_k,l}^{(i)} \right| \right] \tag{39} \\
 & \leq \left( L \sum_{k=1}^K |s_{W_k}| \right)^2 \left\{ 2g(B) \frac{\sigma_w \sqrt{1+\alpha^2}}{\sqrt{W}} \left( g(B) \frac{\sigma_w \sqrt{1+\alpha^2}}{\sqrt{W}} + 4 \log(2 \exp(B) + 1) \right) \right. \\
 & \quad \left. + \frac{2g(B)}{\sqrt{W}} \left\{ \frac{g(B)}{4\sqrt{W}} + B \right\} + \frac{4\mu_m g(B)}{\sqrt{W}} \left( \sigma_w \sqrt{1+\alpha^2} + \frac{1}{2} \right) \right\}. \tag{40}
 \end{aligned}$$

Then, by combining the bounds in **Equation 38** and **Equation 40** and using an instance of Cauchy-Schwarz inequality  $\left( \sum_{k=1}^K |s_{W_k}| \right)^2 \leq K \sum_{k=1}^K s_{W_k}^2$ , we see that the bound in **Equation 37** can be expressed as:

$$\begin{aligned}
 & \left| \mathbb{E}_{\mathcal{A}_W} \left[ (\tilde{\Sigma}_x)_{i,j} - (\Sigma_{\text{Oracle}})_{i,j} \right] \right| \\
 & \leq 4g(B) \frac{\sigma_w \sqrt{1+\alpha^2}}{\sqrt{W}} \left( g(B) \frac{\sigma_w \sqrt{1+\alpha^2}}{\sqrt{W}} + 4 \log(2 \exp(B) + 1) + 2\mu_m \right) + \frac{4g(B)}{\sqrt{W}} \left\{ \frac{g(B)}{4\sqrt{W}} + B + \mu_m \right\}. \tag{41}
 \end{aligned}$$

Next, we see that the oracle estimator follows an Inverse Wishart distribution, that is  $KL\Sigma_{\text{Oracle}} \sim \text{InvWish}_N(\Sigma_x, KL - 1)$ . Therefore, we get:

$$\mathbb{E}[\Sigma_{\text{Oracle}}] = \frac{(KL - 1)}{KL} \Sigma_x.$$

Thus, the bias of the oracle estimator is given by:

$$\left| \text{bias} \left( (\Sigma_{\text{Oracle}})_{i,j} \right) \right| = \frac{1}{KL} \left| (\Sigma_x)_{i,j} \right|. \tag{42}$$

Combining the results in **Equation 41** and **Equation 42**, the bias of  $(\tilde{\Sigma}_x)_{i,j}$  can be bounded as:

$$\begin{aligned}
 \left| \text{bias}_{\mathcal{A}_W} \left( (\tilde{\Sigma}_x)_{i,j} \right) \right| & \leq \frac{\left| (\Sigma_x)_{i,j} \right|}{KL(1-\eta)} + 4g(B) \frac{\sigma_w \sqrt{1+\alpha^2}}{\sqrt{W}} (4 \log(2 \exp(B) + 1) + 2\mu_m) \\
 & \quad + \frac{4g(B)}{\sqrt{W}} (B + \mu_m) + \mathcal{O} \left( \frac{g(B)^2}{W} \right). \tag{43}
 \end{aligned}$$

Finally, under the conditions for  $W$  in **Equation 29**, the latter inequality simplifies to:

$$\begin{aligned}
 \left| \text{bias}_{\mathcal{A}_W} \left( (\tilde{\Sigma}_x)_{i,j} \right) \right| & \stackrel{(p)}{\leq} \frac{\left| (\Sigma_x)_{i,j} \right|}{KL(1-\eta)} + \frac{Bg(B)}{\sqrt{W}} (28\sigma_w \sqrt{1+\alpha^2} + 6) + \mathcal{O} \left( \frac{g(B)^2}{W} \right) \\
 & \stackrel{(q)}{\leq} \frac{\left| (\Sigma_x)_{i,j} \right|}{KL(1-\eta)} + 64\sigma_m \sqrt{\frac{2q \log W}{W^{1-2c}}} (14\sigma_w \sqrt{1+\alpha^2} + 3) + \mathcal{O} \left( \frac{1}{W^{1-2c}} \right) \tag{44}
 \end{aligned}$$

where in (p) we have used  $2 \log(2 \exp(B) + 1) \leq 3B$  and  $B > 2\mu_m$  and in (q) we have used  $Bg(B) \leq 16L^\epsilon \sigma_m \sqrt{8q \log L}$ , which follows from **Equation 30**. Thus, following **Equation 17** we

1426  
1427  
1428  
1429  
1430  
1431  
1432  
1433  
1434  
1435  
1436  
1437  
1438  
1439  
1440  
1441  
1442  
1443  
1444  
1445  
1446  
1447  
1448  
1449  
1450  
1451

derive the bound on the bias of the maximum likelihood estimator:

$$\left| \text{bias}_{\mathcal{A}_W} \left( (\hat{\Sigma}_x)_{i,j} \right) \right| \leq \frac{|\left( \Sigma_x \right)_{i,j}|}{KL(1-\eta)} + \sqrt{\frac{\log W}{W^{1-2\epsilon}}} C_3 \left( 14\sigma_w \sqrt{1+\alpha^2} + 3 \right) + \mathcal{O} \left( \sigma_w^2 \right) + \mathcal{O} \left( \frac{1}{W^{1-2\epsilon}} \right),$$

where  $C_3 := 64\sigma_m \sqrt{2q}$ .

Bounding the variance of  $(\hat{\Sigma}_x)_{i,j}$

Next, we establish an upper bound on the variance of the maximum likelihood estimator of the noise covariance. To that end, we upper-bound the variance of  $(\tilde{\Sigma}_x)_{i,j}$ . First, using the Cauchy-Schwarz inequality, we get:

$$\text{Var} \left( (\tilde{\Sigma}_x)_{i,j} \right) := \mathbb{E} \left[ \left| (\tilde{\Sigma}_x)_{i,j} - \mathbb{E} \left[ (\tilde{\Sigma}_x)_{i,j} \right] \right|^2 \right] \leq \left\{ \sqrt{\mathbb{E} \left[ \left| (\tilde{\Sigma}_x)_{i,j} - (\Sigma_{\text{Oracle}})_{i,j} \right|^2 \right]} + \sqrt{\text{Var} \left( (\Sigma_{\text{Oracle}})_{i,j} \right)} \right\}^2. \quad (45)$$

Then, we upper-bound the conditional second moment of  $\left| (\tilde{\Sigma}_x)_{i,j} - (\Sigma_{\text{Oracle}})_{i,j} \right|$  using the same techniques used in bounding its first moment. Accordingly, we derive:

$$\begin{aligned} & \mathbb{E}_{\mathcal{A}_W} \left[ \left| (\tilde{\Sigma}_x)_{i,j} - (\Sigma_{\text{Oracle}})_{i,j} \right|^2 \right] \\ &= \frac{1}{k^2 L^2} \mathbb{E}_{\mathcal{A}_W} \left[ \left\{ \sum_{k,l=1}^{K,L} \left( (\phi_{B'}^{-1}(\tilde{n}_{W_k,l}^{(i)}) - \mu_x^{(i)} - s_{W_k} \tilde{d}_i) (\phi_{B'}^{-1}(\tilde{n}_{W_k,l}^{(j)}) - \mu_x^{(j)} - s_{W_k} \tilde{d}_j) - (x_{W_k,l}^{(i)} - \mu_x^{(i)} - s_{W_k}(d_{\text{Oracle}})_i) (x_{W_k,l}^{(j)} - \mu_x^{(j)} - s_{W_k}(d_{\text{Oracle}})_j) \right) \right\}^2 \right] \\ &\leq \frac{1}{k^2 L^2} \left\{ \sum_{k,l=1}^{K,L} \left\{ \mathbb{E}_{\mathcal{A}_W} \left[ \left( (\phi_{B'}^{-1}(\tilde{n}_{W_k,l}^{(i)}) - \mu_x^{(i)} - s_{W_k} \tilde{d}_i) (\phi_{B'}^{-1}(\tilde{n}_{W_k,l}^{(j)}) - \mu_x^{(j)} - s_{W_k} \tilde{d}_j) - (x_{W_k,l}^{(i)} - \mu_x^{(i)} - s_{W_k}(d_{\text{Oracle}})_i) (x_{W_k,l}^{(j)} - \mu_x^{(j)} - s_{W_k}(d_{\text{Oracle}})_j) \right)^2 \right] \right\} \right\}^2 \end{aligned} \quad (46)$$

where the last bound follows from the Cauchy-Schwarz inequality. Then, we derive:

$$\begin{aligned} & \mathbb{E}_{\mathcal{A}_W} \left[ \left\{ (\phi_{B'}^{-1}(\tilde{n}_{W_k,l}^{(i)}) - \mu_x^{(i)} - s_{W_k} \tilde{d}_i) (\phi_{B'}^{-1}(\tilde{n}_{W_k,l}^{(j)}) - \mu_x^{(j)} - s_{W_k} \tilde{d}_j) - (x_{W_k,l}^{(i)} - \mu_x^{(i)} - s_{W_k}(d_{\text{Oracle}})_i) (x_{W_k,l}^{(j)} - \mu_x^{(j)} - s_{W_k}(d_{\text{Oracle}})_j) \right\}^2 \right] \\ &= \mathbb{E}_{\mathcal{A}_W} \left[ \left\{ \left( (\phi_{B'}^{-1}(\tilde{n}_{W_k,l}^{(i)}) - \mu_x^{(i)} - s_{W_k} \frac{1}{L \sum_{k',l'=1}^{K,L} s_{W_{k'}}} \sum_{k'',l''=1}^{K,L} s_{W_{k''}} (\phi_{B'}^{-1}(\tilde{n}_{W_{k'',l''}}^{(i)}) - \mu_x^{(i)}) \right) \left( (\phi_{B'}^{-1}(\tilde{n}_{W_k,l}^{(j)}) - \mu_x^{(j)} - s_{W_k} \frac{1}{L \sum_{k'',l''=1}^{K,L} s_{W_{k''}}} \sum_{k''',l'''=1}^{K,L} s_{W_{k'''}} (\phi_{B'}^{-1}(\tilde{n}_{W_{k''',l'''}}^{(j)}) - \mu_x^{(j)}) \right) \right. \right. \\ &\quad \left. \left. - \left( x_{W_k,l}^{(i)} - \mu_x^{(i)} - s_{W_k} \frac{1}{L \sum_{k',l'=1}^{K,L} s_{W_{k'}}} \sum_{k'',l''=1}^{K,L} s_{W_{k''}} (x_{W_{k'',l''}}^{(i)} - \mu_x^{(i)}) \right) \left( x_{W_k,l}^{(j)} - \mu_x^{(j)} - s_{W_k} \frac{1}{L \sum_{k'',l''=1}^{K,L} s_{W_{k''}}} \sum_{k''',l'''=1}^{K,L} s_{W_{k'''}} (x_{W_{k''',l'''}}^{(j)} - \mu_x^{(j)}) \right) \right\}^2 \right] \\ &= \mathbb{E}_{\mathcal{A}_W} \left[ \left\{ \left( (\phi_{B'}^{-1}(\tilde{n}_{W_k,l}^{(i)}) - \mu_x^{(i)}) \left( (\phi_{B'}^{-1}(\tilde{n}_{W_k,l}^{(j)}) - \mu_x^{(j)}) - (x_{W_k,l}^{(i)} - \mu_x^{(i)}) (x_{W_k,l}^{(j)} - \mu_x^{(j)}) \right) \right. \right. \right. \\ &\quad \left. \left. - \frac{s_{W_k}}{L \sum_{k',l'=1}^{K,L} s_{W_{k'}}} \sum_{k'',l''=1}^{K,L} s_{W_{k''}} \left( (\phi_{B'}^{-1}(\tilde{n}_{W_k,l}^{(i)}) - \mu_x^{(i)}) \left( (\phi_{B'}^{-1}(\tilde{n}_{W_{k'',l''}}^{(j)}) - \mu_x^{(j)}) - (x_{W_k,l}^{(i)} - \mu_x^{(i)}) (x_{W_{k'',l''}}^{(j)} - \mu_x^{(j)}) \right) \right) \right. \right. \\ &\quad \left. \left. - \frac{s_{W_k}}{L \sum_{k',l'=1}^{K,L} s_{W_{k'}}} \sum_{k'',l''=1}^{K,L} s_{W_{k''}} \left( (\phi_{B'}^{-1}(\tilde{n}_{W_{k',l'}}^{(i)}) - \mu_x^{(i)}) \left( (\phi_{B'}^{-1}(\tilde{n}_{W_k,l}^{(j)}) - \mu_x^{(j)}) - (x_{W_{k',l'}}^{(i)} - \mu_x^{(i)}) (x_{W_k,l}^{(j)} - \mu_x^{(j)}) \right) \right) \right. \right. \\ &\quad \left. \left. + \frac{s_{W_k}^2}{L^2 \sum_{k',l'=1}^{K,L} s_{W_{k'}}^2 \sum_{k'',l''=1}^{K,L} s_{W_{k''}}^2} \sum_{k''',l'''=1}^{K,L} s_{W_{k'''}} s_{W_{k''}} \left( (\phi_{B'}^{-1}(\tilde{n}_{W_{k',l'}}^{(i)}) - \mu_x^{(i)}) \left( (\phi_{B'}^{-1}(\tilde{n}_{W_{k'',l''}}^{(j)}) - \mu_x^{(j)}) - (x_{W_{k',l'}}^{(i)} - \mu_x^{(i)}) (x_{W_{k'',l''}}^{(j)} - \mu_x^{(j)}) \right) \right) \right\}^2 \right] \\ &\leq \frac{2(g(B))^2}{W} \left( \sigma_w \sqrt{1+\alpha^2} + \frac{1}{2} \right)^2 \left( \frac{g(B)}{\sqrt{W}} \left( \sigma_w \sqrt{1+\alpha^2} + \frac{1}{2} \right) + 2(B + \mu_m) \right)^2 \\ &\quad \times \left( 1 + \frac{s_{W_k} L \sum_{k',l'=1}^K s_{W_{k'}}}{L \sum_{k',l'=1}^K s_{W_{k'}}^2} + \frac{s_{W_k} L \sum_{k'',l''=1}^K s_{W_{k''}}}{L \sum_{k'',l''=1}^K s_{W_{k''}}^2} + \frac{s_{W_k}^2 L \sum_{k',l'=1}^K s_{W_{k'}} L \sum_{k'',l''=1}^K s_{W_{k''}}}{L^2 \sum_{k',l'=1}^K s_{W_{k'}}^2 \sum_{k'',l''=1}^K s_{W_{k''}}^2} \right). \end{aligned} \quad (47)$$

Using the final bound of **Equation 47** in **Equation 46**, we get:

$$\begin{aligned}
 & \sqrt{\mathbb{E}_{\mathcal{A}_W} \left[ \left| (\tilde{\Sigma}_x)_{i,j} - (\Sigma_{\text{Oracle}})_{i,j} \right|^2 \right]} \\
 & \leq \frac{\sqrt{2}g(B)}{\sqrt{W}} \left( \sigma_w \sqrt{1 + \alpha^2} + \frac{1}{2} \right) \left( \frac{g(B)}{\sqrt{W}} \left( \sigma_w \sqrt{1 + \alpha^2} + \frac{1}{2} \right) + 2(B + \mu_m) \right) \\
 & \quad \times \frac{1}{KL} \left( KL + \frac{L \sum_{k=1}^K |s_{W_k}| \sum_{k'=1}^K |s_{W_{k'}}|}{\sum_{k'=1}^K s_{W_{k'}}^2} + \frac{L \sum_{k=1}^K |s_{W_k}| \sum_{k''=1}^K |s_{W_{k''}}|}{\sum_{k''=1}^K s_{W_{k''}}^2} + \frac{L \sum_{k=1}^K s_{W_k}^2 \sum_{k'=1}^K |s_{W_{k'}}| \sum_{k''=1}^K |s_{W_{k''}}|}{\sum_{k'=1}^K s_{W_{k'}}^2 \sum_{k''=1}^K s_{W_{k''}}^2} \right) \\
 & \leq \frac{4\sqrt{2}g(B)}{\sqrt{W}} \left( \sigma_w \sqrt{1 + \alpha^2} + \frac{1}{2} \right) \left( \frac{g(B)}{\sqrt{W}} \left( \sigma_w \sqrt{1 + \alpha^2} + \frac{1}{2} \right) + 2(B + \mu_m) \right), \tag{48}
 \end{aligned}$$

where the last inequality follows from an instance of the Cauchy-Schwarz inequality, i.e.,  $\left( \sum_{k=1}^K |s_{W_k}| \right)^2 \leq K \sum_{k=1}^K s_{W_k}^2$ .

Then, following the observation  $KL \Sigma_{\text{Oracle}} \sim \text{InvWish}_N(\Sigma_x, KL - 1)$ , we derive the variance of  $(\Sigma_{\text{Oracle}})_{i,j}$ :

$$\text{Var} \left( (\Sigma_{\text{Oracle}})_{i,j} \right) = \delta_{i,j}^2 = \frac{(KL - 1) \left( (\Sigma_x)_{i,j}^2 + (\Sigma_x)_{i,j} (\Sigma_x)_{j,j} \right)}{K^2 L^2}. \tag{49}$$

Combining **Equation 45**, **Equation 48** and **Equation 49**, we express the upper bound on the conditional variance of  $(\tilde{\Sigma}_x)_{i,j}$  as:

$$\sqrt{\text{Var}_{\mathcal{A}_W} \left( (\tilde{\Sigma}_x)_{i,j} \right)} \leq \frac{1}{\sqrt{1 - \eta}} \delta_{i,j} + \frac{8\sqrt{2}g(B)}{\sqrt{W}} (B + \mu_m) \left( \sigma_w \sqrt{1 + \alpha^2} + \frac{1}{2} \right) + \mathcal{O} \left( \frac{g(B)^2}{W} \right).$$

Then, following **Equation 17** and the conditions in **Equation 29**, we conclude the proof of the upper bound on the conditional variance of  $(\hat{\Sigma}_x)_{i,j}$ :

$$\sqrt{\text{Var}_{\mathcal{A}_W} \left( (\hat{\Sigma}_x)_{i,j} \right)} \leq \frac{1}{\sqrt{1 - \eta}} \delta_{i,j} + \sqrt{\frac{\log W}{W^{1-2\epsilon}}} C_4 \left( 2\sigma_w \sqrt{1 + \alpha^2} + 1 \right) + \mathcal{O}(\sigma_w^2) + \mathcal{O} \left( \frac{1}{W^{1-2\epsilon}} \right),$$

where  $C_4 := 384\sigma_m \sqrt{q}$ .

Finally, it only remains to prove that the event  $\mathcal{A}_W$  occurs with high probability for sufficiently large  $W$ :

**Lemma 3.** *The probability of occurrence of the event  $\mathcal{A}_W = \left\{ \left| x_{W_k,l}^{(j)} \right| \leq B \text{ and } \frac{1}{2(1+\exp(B))} \leq \bar{n}_{W_k,l}^{(j)} \leq 1 - \frac{1}{2(1+\exp(B))} \text{ for } j = 1, \dots, N, k = 1, \dots, K \text{ and } l = 1, \dots, L \right\}$  is upper-bounded as follows:*

$$\mathbb{P}(\mathcal{A}_W) \geq 1 - \eta,$$

for some constant  $0 < \eta \leq 1/2$  satisfying the conditions of Eq. (29).

*Proof of Lemma 3.* First, using the union bound, we have:

$$\mathbb{P}(\mathcal{A}_W) \geq 1 - \sum_{k,l,j=1}^{K,L,N} \left\{ \mathbb{P} \left( \left| x_{W_k,l}^{(j)} \right| > B \right) + \mathbb{P} \left( \bar{n}_{W_k,l}^{(j)} < \frac{1}{2(1+\exp(B))} \right) + \mathbb{P} \left( \bar{n}_{W_k,l}^{(j)} > 1 - \frac{1}{2(1+\exp(B))} \right) \right\}. \tag{50}$$

1482  
1483  
1484  
1485  
1486  
1487  
1488  
1489  
1490  
1491  
1492  
1493  
1494  
1495  
1496  
1497  
  
1498  
1499  
1500  
1501  
1502  
1503  
1504  
1505  
1506  
1507  
1508  
1509  
  
1510  
1511  
1512  
1513  
1514  
1515  
1516  
1517  
1518  
1519  
1520  
  
1521  
1522

Next, we bound the probabilities on the right hand side using Chernoff's inequality (*Boucheron et al., 2013*). First, note that:

$$\begin{aligned} \mathbb{P}\left(x_{W_k,l}^{(j)} > B\right) &= \mathbb{P}\left(x_{W_k,l}^{(j)} - \mu_x^{(j)} - s_{W_k} d_j > B - \mu_x^{(j)} - s_{W_k} d_j\right) \\ &\stackrel{(r)}{\leq} \mathbb{P}\left(x_{W_k,l}^{(j)} - \mu_x^{(j)} - s_{W_k} d_j > \frac{B}{2}\right) \\ &\stackrel{(s)}{\leq} \exp\left(-\frac{B^2}{8\sigma_m^2}\right), \end{aligned}$$

where (r) follows if  $B > 2(\|\mu_x\|_\infty + \max_{k,j} \{|s_{W_k} d_j|\})$  (which will hold under the conditions in *Equation 29*) and (s) has been derived by applying the Chernoff's bound on the Gaussian random variable  $x_{W_k,l}^{(j)}$ . From the same reasoning we see that  $\mathbb{P}\left(x_{W_k,l}^{(j)} < -B\right) \leq \exp\left(-\frac{B^2}{8\sigma_m^2}\right)$ . Combining these two results, we get the upper bound:

$$\mathbb{P}\left(|x_{W_k,l}^{(j)}| > B\right) \leq 2 \exp\left(-\frac{B^2}{8\sigma_m^2}\right). \quad (51)$$

Next, note that:

$$\begin{aligned} \mathbb{P}\left(\bar{n}_{W_k,l}^{(j)} < \frac{1}{2(1 + \exp(B))}\right) &\stackrel{(u)}{\leq} \mathbb{P}\left(\bar{n}_{W_k,l}^{(j)} - \phi\left(x_{W_k,l}^{(j)}\right) < \frac{-1}{2(1 + \exp(B))}\right) \\ &\stackrel{(v)}{\leq} \exp\left(-\frac{W}{16(1 + \exp(B))^2}\right), \end{aligned} \quad (52)$$

where (u) follows from the observation  $\frac{1}{1 + \exp(B)} < \phi\left(x_{W_k,l}^{(j)}\right)$  (which is a consequence of  $|x_{W_k,l}^{(j)}| < B$ ). Then, we note that the zero-mean random variable  $\bar{n}_{W_k,l}^{(j)} - \phi\left(x_{W_k,l}^{(j)}\right)$  is sub-Gaussian with variance factor  $\frac{2}{W}$ . Thus, using the Chernoff's inequality on sub-Gaussian random variables (*Boucheron et al., 2013*), we derive the upper-bound (v) in *Equation 52*. In a similar fashion, based on the observation  $\phi\left(x_{W_k,l}^{(j)}\right) < 1 - \frac{1}{1 + \exp(B)}$ , we conclude the bound:

$$\mathbb{P}\left(\bar{n}_{W_k,l}^{(j)} > 1 - \frac{1}{2(1 + \exp(B))}\right) \leq \exp\left(-\frac{W}{16(1 + \exp(B))^2}\right). \quad (53)$$

By combining the bounds in *Equation 51*, *Equation 52* and *Equation 53*, the upper bound on  $\mathbb{P}(\mathcal{A}_W)$  in *Equation 50* takes the form:

$$\mathbb{P}(\mathcal{A}_W) \geq 1 - 2KLN \exp\left(-\frac{W}{16(1 + \exp(B))^2}\right) - 2KLN \exp\left(-\frac{B^2}{8\sigma_m^2}\right).$$

Finally, under the assumptions in *Equation 29*, we further simplify this bound as:

$$\mathbb{P}(\mathcal{A}_W) \geq 1 - 2KLN \exp\left(-\frac{W^{1-\epsilon}}{64}\right) - \frac{2KLN}{W^q} \geq 1 - \frac{4KLN}{W^q},$$

where we have used  $W \geq 2$  (which gives  $\log W \geq 2 \log \log W$ ) and  $\log W \geq \frac{2 \log(64q)}{1-2\epsilon}$  to show that  $\frac{W^{1-\epsilon}}{64} \geq q \log W$ . Thus,  $\log W \geq \frac{\log(8KLN/\eta)}{q}$  ensures that  $\mathbb{P}(\mathcal{A}_W) \geq 1 - \eta$ , for  $0 < \eta \leq \frac{1}{2}$ .  $\square$

This concludes the proof of Theorem 1.  $\square$

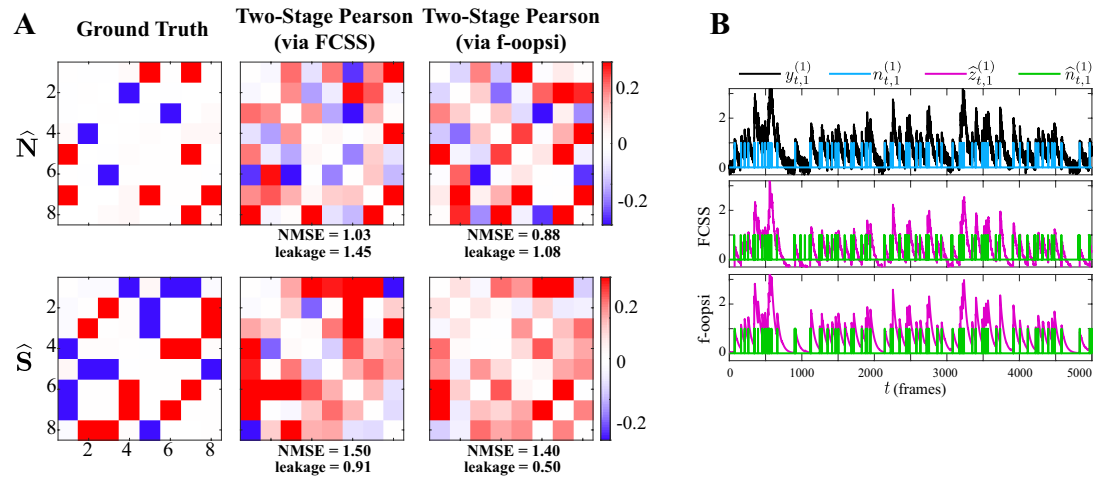

1523

**Figure 2-Figure supplement 1.** A) Noise (first row) and signal (second row) correlations corresponding to the ground truth (first column), estimated by the two-stage Pearson method using the FCSS (*Kazemipour et al., 2018*) (second column) and constrained f-oopsi (*Pnevmatikakis et al., 2016*) (third column) spike deconvolution techniques, for the simulation study in Figure 2. The NMSE and leakage ratios of the estimates are indicated below each panel. While the correlation estimates based on these two methods are comparable, there exist notable differences between them, as a result of the slight discrepancies in the deconvolved spikes. This demonstrates that the two-stage estimates are notably sensitive to minor differences in the estimated spikes obtained by different deconvolution techniques. In addition, both two-stage Pearson estimates fail to capture the ground truth correlations (as is also evident from the high NMSE and leakage values). B) Simulated observations (black, re-scaled for ease of visual comparison) and ground truth spikes (blue), as well as the estimated calcium concentrations (purple) and putative spikes (green) for the 1<sup>st</sup> trial of neuron 1 in the simulation study of Figure 2, using the FCSS (*Kazemipour et al., 2018*) (second row) and constrained f-oopsi (*Pnevmatikakis et al., 2016*) (third row) spike deconvolution methods.

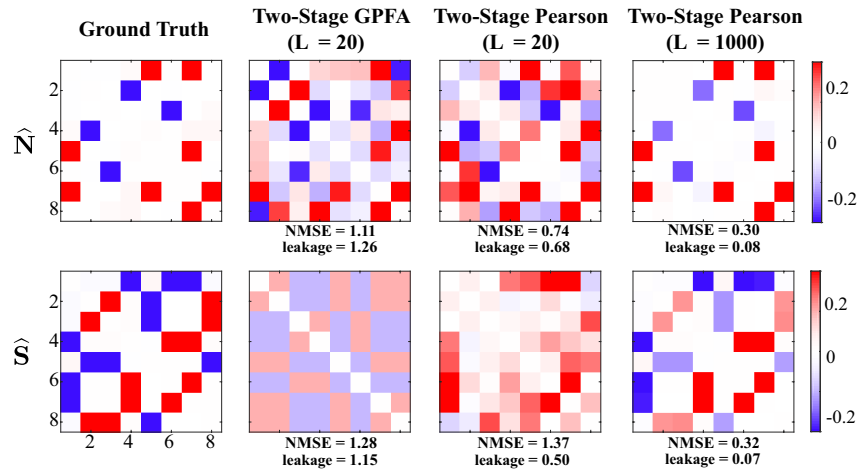

1524

**Figure 2-Figure supplement 2.** Performance of two stage estimates based on ground truth spikes. Noise (first row) and signal (second row) correlations corresponding to the ground truth (first column) are repeated from **Figure 2**. The second and third columns show the results of two-stage GPFA and two-stage Pearson methods using  $L = 20$  trials, respectively. The fourth column shows the results of the two-stage Pearson method using  $L = 1000$  trials. All estimates were obtained using the ground truth spikes, as opposed to extracting the spikes via a deconvolution technique. Thus, these results isolate the effect of the non-linearities involved in spike generation on the estimation performance. The NMSE and leakage ratios of the estimates are indicated below each panel. Even though the ground truth spikes are used, the NMSE and leakage ratios indicated in the second and third columns are remarkably high. This further shows that the usage of conventional definitions and GPFA estimates is not optimal for the recovery of signal and noise correlations. In accordance with our theoretical analysis in **Appendix 1**, the performance of the two-stage Pearson method significantly improves as the number of trials is increased to  $L = 1000$ , a number that is unrealistic in the context of typical two-photon imaging experiments. However, our proposed method shown in **Figure 2** achieves comparable performance with number of trials as low as  $L = 20$ . In summary, these results suggest that the two-stage methods produce highly biased estimates under limited number of trials, even if the ground truth spikes were ideally deconvolved from the two-photon data.

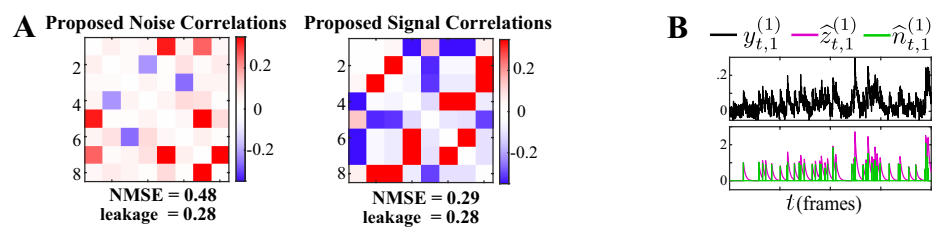

1525

**Figure 2-Figure supplement 3.** A) Proposed noise and signal correlation estimates for data simulated at lower SNR than the setting of **Figure 2** and model mismatch introduced by using a second-order autoregressive model for the calcium decay. The ground truth correlations are the same as those in **Figure 2**. The NMSE and leakage ratio are given at the bottom. B) putative spikes (green) and estimated calcium concentrations (purple). The model mismatch and lower SNR result in slight performance degradation compared to **Figure 2** (in terms of NMSE and leakage), and our method is capable of recovering the underlying correlations faithfully.

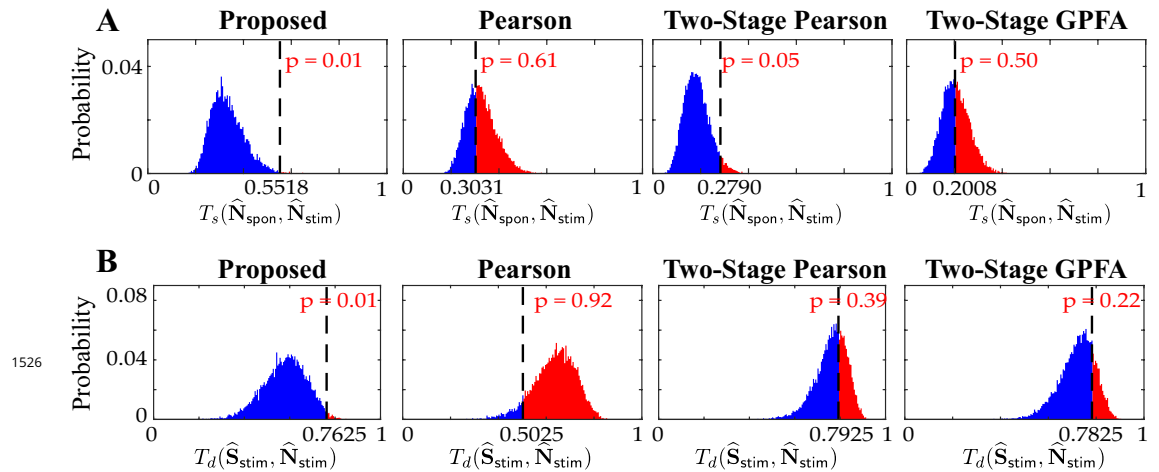

**Figure 6-Figure supplement 1.** Null distributions of A) the similarities between  $N_{\text{spon}}$  and  $N_{\text{stim}}$  (top:  $T_s(\hat{N}_{\text{spon}}, \hat{N}_{\text{stim}})$ ) and B) the dissimilarities between  $\hat{S}_{\text{stim}}$  and  $\hat{N}_{\text{stim}}$  (bottom:  $T_d(\hat{S}_{\text{stim}}, \hat{N}_{\text{stim}})$ ), obtained by the shuffling procedure applied to the results of real data study 2 in **Figure 6**. The observed test statistic in each case is indicated by a dashed vertical line. Rows from left to right: proposed method, Pearson correlations from two-photon data, two-stage Pearson correlations and two-stage GPFA estimates. These results show that the only statistically significant outcomes (with  $p \leq 0.05$ ) are the similarities and dissimilarities obtained by our proposed method.

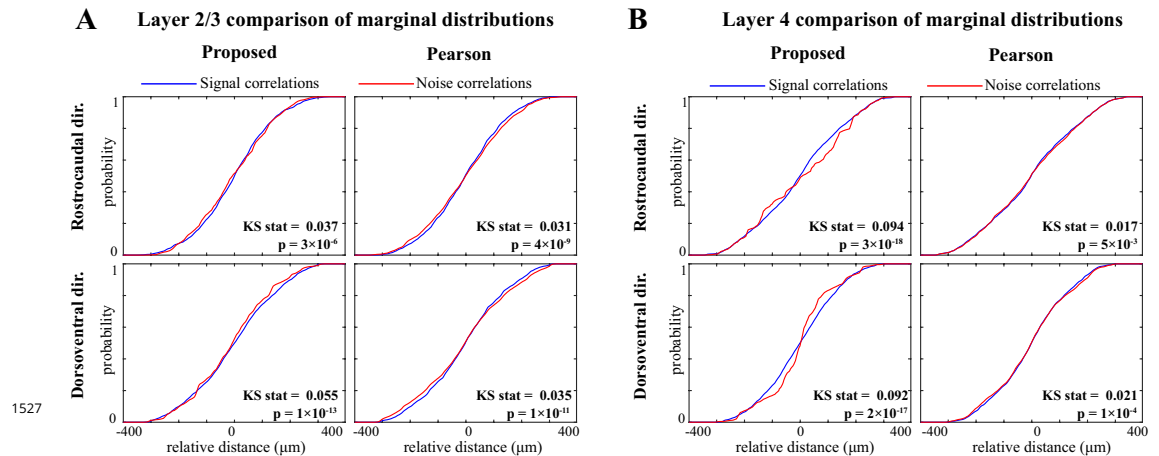

**Figure 7-Figure supplement 1.** Comparison of marginal distributions of signal and noise correlations. A) Cumulative marginal probability distributions of signal (blue) and noise (red) correlations along the rostromedial (top) and dorsoventral (bottom) directions, as estimated by the proposed method (left) and Pearson correlations from two-photon data (right), in layer 2/3 neurons. The Kolmogorov-Smirnov (KS) test statistic along with the corresponding p-values are indicated as insets in each panel. Panel B shows the results for layer 4 in the same organization as panel A. These results show that along both directions and in both layers, the signal correlation distributions are significantly different from the corresponding noise correlation distributions, consistently for both methods. However, the KS statistics (i.e., effect sizes) for the proposed estimate are remarkably larger than those obtained from the Pearson estimates.



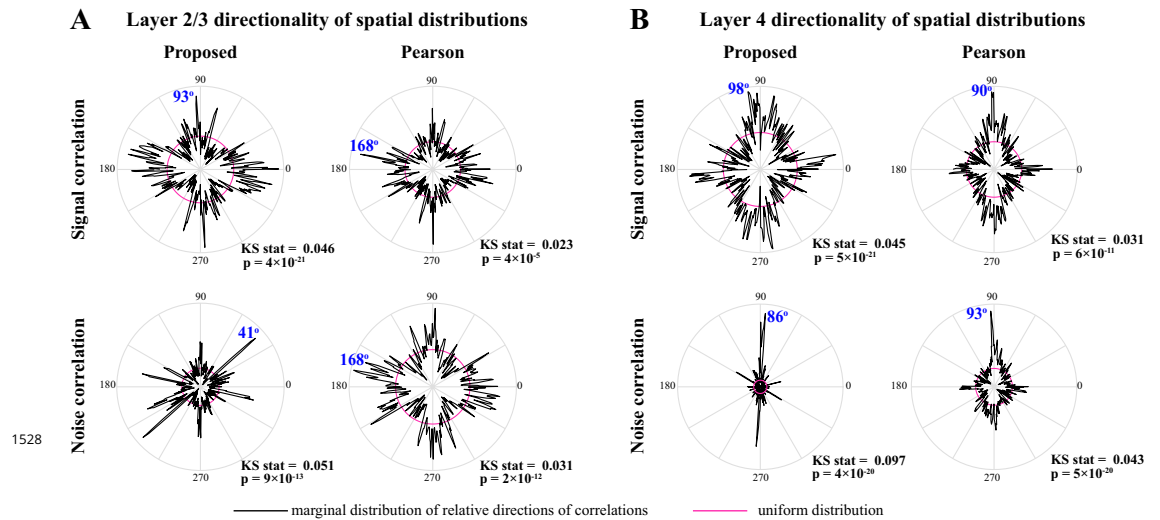

**Figure 7-Figure supplement 2.** Polar plots of the angular marginal distributions of correlations. A) Polar histograms indicating the distribution of signal (top) and noise (bottom) correlations as a function of relative angle (in the dorsoventral-rostrocaudal coordinate system) between pairs of neurons in layer 2/3, as estimated by the proposed method (left) and Pearson correlations from two-photon data (right). The KS test statistic comparing each polar distribution with a uniform distribution (shown in magenta), along with the corresponding p-values are indicated below each polar plot. The mode of each probability distribution is also indicated in blue fonts. Panel B shows the results for layer 4 in the same organization as panel A. All distributions are significantly non-uniform, and particularly indicate a rostrocaudal directionality in layer 4 (as indicated by the mode angles in panel B).
